# Supplementary material for: Does improving sleep lead to better mental health? A protocol for a meta-analytic review of randomised controlled trials
Source: PubMed Central journal article supplement — BMJ Open. 2017 Sep 18;7(9):e016873. doi: 10.1136/bmjopen-2017-016873 (PMC5623526; doi:10.1136/bmjopen-2017-016873), 2017-09-18
Supplement: bmjopen-2017-016873.draft_revisions.pdf [file bmjopen-2017-016873.draft_revisions.pdf]

# BMJ Open

BMJ Open is committed to open peer review. As part of this commitment we make the peer review history of every article we publish publicly available.

When an article is published we post the peer reviewers' comments and the authors' responses online. We also post the versions of the paper that were used during peer review. These are the versions that the peer review comments apply to.

The versions of the paper that follow are the versions that were submitted during the peer review process. They are not the versions of record or the final published versions. They should not be cited or distributed as the published version of this manuscript.

BMJ Open is an open access journal and the full, final, typeset and author-corrected version of record of the manuscript is available on our site with no access controls, subscription charges or pay-per-view fees (<http://bmjopen.bmj.com>).

If you have any questions on BMJ Open's open peer review process please email [info.bmjopen@bmj.com](mailto:info.bmjopen@bmj.com)

# BMJ Open

## Does Improving Sleep Lead to Better Mental Health and Wellbeing? A Protocol for a Meta-Analytic Review of Randomised Controlled Trials

|                                 |                                                                                                                                                                                                             |
|---------------------------------|-------------------------------------------------------------------------------------------------------------------------------------------------------------------------------------------------------------|
| Journal:                        | <i>BMJ Open</i>                                                                                                                                                                                             |
| Manuscript ID                   | Draft                                                                                                                                                                                                       |
| Article Type:                   | Protocol                                                                                                                                                                                                    |
| Date Submitted by the Author:   | n/a                                                                                                                                                                                                         |
| Complete List of Authors:       | Scott, Alex; Sheffield University, School of Health and Related Research<br>Webb, Thomas; Sheffield University, Department of Psychology<br>Rowse, Georgina; Sheffield University, Clinical Psychology Unit |
| <b>Primary Subject Heading</b>: | Mental health                                                                                                                                                                                               |
| Secondary Subject Heading:      | Public health                                                                                                                                                                                               |
| Keywords:                       | Meta-analysis, Review, Protocol, Sleep, MENTAL HEALTH, Wellbeing                                                                                                                                            |
|                                 |                                                                                                                                                                                                             |

SCHOLARONE™  
Manuscripts

Does Improving Sleep Lead to Better Mental Health and Wellbeing?

1

1 **Does Improving Sleep Lead to Better Mental Health and Wellbeing? A Protocol for a Meta-**  
2 **Analytic Review of Randomised Controlled Trials**

3 Alexander J. Scott, Thomas L. Webb, & Georgina Rowse

4 The University of Sheffield, UK

5 For submission to: *BMJ Open*

6 Prospero registration: CRD42017055450

7 Word count (excluding tables, figures and references): 2661

8  
9  
10  
11  
12  
13 Correspondence concerning this article should be addressed to Alexander Scott, School of  
14 Health and Related Research, The University of Sheffield, Regent Court, 30 Regent Street,  
15 Sheffield, S1 4DA, alex.scott@sheffield.ac.uk

1  
2  
3  
4 16 **Abstract**

5  
6 17 **Introduction:** Sleep and mental health go hand-in-hand, with many, if not all, mental health  
7  
8 18 problems being associated with problems sleeping. Although sleep has been traditionally  
9  
10 19 conceptualized as a secondary consequence of mental health problems, contemporary views  
11  
12 20 prescribe a more influential, causal role of sleep in the formation and maintenance of mental  
13  
14 21 health problems. One way to evaluate this assertion is to examine the extent to which  
15  
16 22 interventions that successfully improve sleep also improve mental health and wellbeing.  
17

18  
19 23 **Method and analysis:** Randomized controlled trials describing the effects of interventions  
20  
21 24 designed to improve sleep on mental health and wellbeing will be retrieved via a systematic  
22  
23 25 search of bibliographic databases. Following this, meta-analysis will be used to synthesize the  
24  
25 26 effects reported in eligible trials and investigate the impact of variables that could potentially  
26  
27 27 moderate the effect of changes in sleep on outcomes pertaining to mental health and wellbeing.  
28  
29

30 28 **Ethics and dissemination:** This study requires no ethical approval. We will submit the findings  
31  
32 29 for publication in a peer-reviewed journal and promote the review to relevant stakeholders (i.e.,  
33  
34 30 clinicians, policy makers, and the general public).  
35  
36  
37  
38

39 31  
40  
41 32 *Word count:* 180 words  
42  
43

44 33  
45  
46 34 *Keywords:* Meta-analysis; protocol; review; sleep; mental health; wellbeing; intervention  
47  
48  
49 35

## Does Improving Sleep Lead to Better Mental Health and Wellbeing?

3

**Strengths**

- The present review will significantly strengthen the evidence base on the effect of interventions designed to improve sleep on mental health and wellbeing outcomes.
- The present review will elucidate the causal relationship between sleep and mental health.
- We will use the GRADE system to report the strength of the evidence base. This will allow members of the public, researchers and clinicians to quickly access the available evidence and judge its quality.

**Limitations**

- The present review will include a diverse range of interventions and target problems that might lead to a heterogeneous group of studies. To mitigate this we will use moderation analysis to investigate specific factors that might influence the effect of sleep improvement on mental health and wellbeing.

Does Improving Sleep Lead to Better Mental Health and Wellbeing?

4

1  
2  
3  
4 49 **Does Improving Sleep Lead to Better Mental Health and Wellbeing? A Protocol for a Meta-**  
5  
6 50 **Analytic Review of Randomized Controlled Trials**  
7

8  
9 51 Difficulties sleeping and mental health problems are both public health concerns in their  
10  
11 52 own right; with each having a substantive impact on both individuals and society as a whole<sup>1-4</sup>.  
12  
13 53 However, sleep and mental health go hand-in-hand, with many, if not all, mental health problems  
14  
15 54 being associated with problems sleeping<sup>5-7</sup>. Traditionally, sleep problems have been viewed as a  
16  
17 55 consequence of mental health problems; however, evidence suggests that problems sleeping can  
18  
19 56 contribute both to the formation of new mental health problems<sup>8-10</sup> and to the maintenance of  
20  
21 57 existing ones<sup>11-13</sup>. In other words, sleep is now thought to be causally related to mental health,  
22  
23 58 with problems sleeping likely to influence both the onset and trajectory of a variety of mental  
24  
25 59 health difficulties. Having said this, although a number of empirical studies have manipulated  
26  
27 60 sleep and examined the impact of so doing on outcomes related to mental health, to date there  
28  
29 61 has not been a systematic review of these studies. Consequently, the magnitude of the effect of  
30  
31 62 (changes in) sleep on mental health problems is difficult to estimate and has not been compared  
32  
33 63 between different mental health outcomes and other factors that might influence the effect (e.g.,  
34  
35 64 across different groups of participants, research designs, and approaches to intervention).  
36  
37  
38  
39  
40

41 65 The potential for a causal relationship between sleep and mental health also raises an  
42  
43 66 intriguing prospect; namely, that interventions designed to improve sleep could also improve  
44  
45 67 mental health. Providing a definitive answer to this question would have important implications  
46  
47 68 for clinicians, researchers, and members of the public alike. From a practical perspective, if  
48  
49 69 interventions designed to improve sleep can change mental health outcomes, then they may be a  
50  
51 70 useful tool for tackling mental health difficulties. Indeed, interventions designed to improve  
52  
53 71 sleep can often be delivered remotely, in self-help and group formats, and / or at little cost  
54  
55  
56  
57  
58  
59  
60

## Does Improving Sleep Lead to Better Mental Health and Wellbeing?

5

1  
2  
3  
4 72 through the internet<sup>14-18</sup>. For example, a meta-analysis by Ho et al. reported that self-help  
5  
6 73 interventions based on the principles of CBT for insomnia (termed CBTi) had medium-to-large  
7  
8 74 effects on the symptoms of insomnia<sup>16</sup>.

**75 Problems with extant literature and opportunities**

10  
11  
12  
13 76 The relationship between sleep and mental health is well documented, with numerous  
14  
15 77 reviews testifying to a robust link between the two<sup>6-8 19-24</sup>. However, the majority of these  
16  
17 78 reviews have tended to focus on primary studies with correlational research designs. That is, they  
18  
19 79 either; i) measure associations between variables at a single time point (i.e., cross-sectional  
20  
21 80 designs); or ii) measure associations between variables at multiple time points (i.e., longitudinal  
22  
23 81 designs). For example, many reviews simply report the typical sleep profiles of those with  
24  
25 82 mental health difficulties relative to those without<sup>25-28</sup>. Cross-sectional designs simply tell us  
26  
27 83 that variables are associated in some way. It is impossible to determine whether sleep causes  
28  
29 84 mental health complaints, or mental health complaints cause difficulties sleeping, or whether the  
30  
31 85 effect is bi-directional in nature.

32  
33  
34  
35  
36  
37 86 Longitudinal studies, although still correlational in nature, are better able to elucidate  
38  
39 87 causality than their cross-sectional counterparts. However, only a handful of reviews have  
40  
41 88 provided evidence on the relationship between sleep (at one point in time) and mental health  
42  
43 89 outcomes (measured later), and all of these have focused on depression, tending to report that  
44  
45 90 poor sleep quality is associated with depression<sup>8 29-31</sup>. For example, Baglioni et al.<sup>8</sup> conducted a  
46  
47 91 meta-analytic evaluation of 21 studies investigating the longitudinal associations between  
48  
49 92 insomnia and depression. Baglioni et al. reported that non-depressed people with insomnia had a  
50  
51 93 twofold risk of developing depression compared to people who did not experience difficulties  
52  
53 94 sleeping at baseline. Longitudinal designs, although better placed to infer causation, are still  
54  
55  
56  
57  
58  
59  
60

## Does Improving Sleep Lead to Better Mental Health and Wellbeing?

6

1  
2  
3  
4 95 susceptible to the ‘third variable problem’<sup>32-34</sup>. Namely, that a third, unmeasured variable (e.g.,  
5  
6 96 having young children) could cause both sleep difficulties and mental health problems. In  
7  
8 97 summary, correlational designs are not a valid way of disentangling the relationship between  
9  
10 98 problems sleeping and mental health.

11  
12  
13 99 Some reviews have assessed the impact of interventions designed to improve sleep on  
14  
15 100 mental health outcomes<sup>18 35-38 24 39 40</sup>. However, even these reviews do not permit us to draw  
16  
17 101 robust conclusions as to the causal impact of sleep quality on mental health outcomes for a  
18  
19 102 number of reasons. First, these reviews often include interventions that have not successfully  
20  
21 103 manipulated sleep (i.e., studies in which there was no significant impact of the intervention on  
22  
23 104 sleep outcomes). Such studies do not tell us anything about the relationship between sleep and  
24  
25 105 mental health other than that it can be difficult to improve sleep. Second, the focus of extant  
26  
27 106 reviews reporting both sleep and mental health variables has been on improving sleep, with the  
28  
29 107 measurement of mental health outcomes typically limited to depression and anxiety.  
30  
31 108 Consequently, the effect of improving sleep on other mental health difficulties and wellbeing  
32  
33 109 more broadly is currently unclear.

34  
35  
36  
37  
38  
39 110 Finally, to our knowledge, there has been no attempt to date to investigate variables that  
40  
41 111 influence, or *moderate*, the impact of interventions that improve sleep on mental health.  
42  
43 112 Interventions designed to improve sleep are likely to vary in their content and delivery, and such  
44  
45 113 variables may influence how effective they are in improving sleep and / or mental health  
46  
47 114 outcomes. Furthermore, variables related to the nature of the sample (e.g., age, severity of  
48  
49 115 symptoms, nature of the mental health problem) and methodological features of the primary  
50  
51 116 study (e.g., self-report vs. objective assessment of the outcome variables, and so on) are likely to  
52  
53 117 influence the effect of the respective intervention. It is therefore crucial that the impact of such  
54  
55  
56  
57  
58  
59  
60



## Does Improving Sleep Lead to Better Mental Health and Wellbeing?

7

1  
2  
3  
4 118 variables is systematically examined across the extant evidence base in order to draw reliable and  
5  
6 119 valid conclusions about the impact of changes in sleep on outcomes pertaining to mental health  
7  
8  
9 120 and well-being.

10  
11 **The proposed review**

12  
13 122 A number of primary research studies have experimentally manipulated sleep (typically  
14  
15  
16 123 via some sort of psychological intervention) and then measured mental health outcomes.  
17  
18 124 However, these individual studies have, to our knowledge, never been integrated in a manner that  
19  
20 125 allows the magnitude of the effect of sleep on mental health outcomes to be estimated. Therefore,  
21  
22 126 it is currently difficult to; i) draw firm conclusions about the relationship between sleep and  
23  
24  
25 127 various mental health problems; and ii) recommend with any confidence that mental health  
26  
27 128 problems might be tackled using interventions that have been designed to improve sleep.  
28  
29 129 Furthermore, there has been no attempt to date to understand the factors that influence, or  
30  
31  
32 130 moderate, the effect of improvements in sleep on mental health. As a consequence, clinicians,  
33  
34 131 researchers, and members of the public may be unaware of whether and how the content and  
35  
36  
37 132 nature of the intervention(s), target sample and mental health problem, and methodological  
38  
39 133 features of the primary study can influence the efficacy of an intervention.

40  
41 **Objectives**

42  
43  
44 135 The proposed review therefore has two broad objectives; i) to synthesize and quantify the  
45  
46 136 effect of interventions that *successfully* improve sleep quality on mental health outcomes; and ii)  
47  
48  
49 137 to explore variables that moderate the effect of interventions targeting sleep on both sleep and  
50  
51 138 mental health outcomes.  
52  
53  
54  
55  
56  
57  
58  
59  
60

## 139 **Method and Analysis**

140 This protocol has been prepared in accordance with the Preferred Reporting Items for  
141 Systematic Reviews and Meta-Analyses Protocol (PRISMA-P, see Supplementary Materials 1)  
142 checklist<sup>41</sup>.

### 143 **Eligibility Criteria**

#### 144 ***Inclusion criteria***

145 In order to be included in the proposed review, the primary studies need to:

- 146 1. Randomly allocate participants to either an experimental group that receive an intervention  
147 that is designed to improve sleep or a comparator group.
- 148 2. Report a statistically significant improvement on a measure of sleep quality among  
149 participants in the experimental group as compared to those in the comparison group.
- 150 3. Include a measure of mental health outcomes subsequent to the measure of sleep quality.
- 151 4. Report sufficient data for us to be able to compute an effect size. Where sufficient data is not  
152 reported, we will contact the authors and request further data. However, if this is not  
153 provided then the study will not be included in the review.

#### 154 ***Exclusion criteria***

155 The aim of the proposed review is to be as inclusive as possible and address potential  
156 differences between the primary studies (e.g., differences in the nature of the intervention or the  
157 mental health problem under consideration) using moderation analysis. Therefore, very few  
158 exclusion criteria will be applied. For example, we will not restrict the type of intervention (e.g.,  
159 psychological and pharmacological), publication status, nature of the comparison condition, or  
160 sample. However, studies with the following characteristics will be excluded in order to ensure

## Does Improving Sleep Lead to Better Mental Health and Wellbeing?

9

1  
2  
3  
4 161 that we can reliably assess the independent contribution of changes in sleep to mental health  
5  
6 162 outcomes:

- 7  
8  
9 163 1. Studies where the intervention contains elements that specifically target a mental health  
10  
11 164 problem alongside improving sleep (e.g., an intervention that provides CBT for anxiety  
12  
13 165 alongside efforts to improve sleep).  
14  
15  
16 166 2. Studies adopting a pre-post (or within participant) design.

17  
18 167 **Information Sources**

19  
20 168 The proposed review will use a combination of search techniques and sources in order to  
21  
22 169 identify potential studies. First, we will search MEDLINE, Embase, PsycINFO, and The  
23  
24 170 Cochrane Library using the Cochrane Highly Sensitive Search Strategy<sup>42</sup> to identify randomized  
25  
26 171 controlled trials that include terms relating to sleep quality/disorders and mental health/wellbeing  
27  
28 172 outcomes (see Table 1 for a list of the proposed search terms). The search strategy has been  
29  
30 173 developed in collaboration with a health sciences librarian specializing in systematic search  
31  
32 174 procedures and will be used to search each database (see Supplementary Materials 2 for an  
33  
34 175 example search strategy). Second, the reference lists of extant reviews of the relationship  
35  
36 176 between sleep and mental health (cited in the introduction) will be searched for any potential  
37  
38 177 articles. Third, a search for any unpublished or ongoing studies will be conducted by searching  
39  
40 178 online databases including White Rose Online, The National Research Register, WHO approved  
41  
42 179 clinical trial databases, and PROSPERO. Finally, the authors of articles deemed eligible for  
43  
44 180 inclusion will be contacted and asked if they are aware of any unpublished research that may be  
45  
46 181 eligible for inclusion in the review.  
47  
48  
49  
50  
51  
52  
53  
54  
55  
56  
57  
58  
59  
60

**Data management**

All records will be stored in the reference management software Endnote, and we will follow PRISMA guidelines for the selection of studies for meta-analysis<sup>43</sup>. Specifically, when the pool of potential studies have been identified, we will remove duplicates and initially screen each record based on the title and abstract and exclude clearly ineligible studies. Following this initial screening, the full-text versions of each article will be reviewed in detail and cross-referenced with the inclusion and exclusion criteria. The flow of articles through the review, including the reasons for excluding studies will be documented in a PRISMA flow chart.

**Data Extraction**

Data will be recorded on standardized data extraction forms and a manual to accompany the form will detail each variable to be extracted alongside definitions and examples (see Supplementary Materials 3 & 4). Two reviewers will pilot the data collection forms and manual on three of the included articles in order to ensure that there are no systematic problems or difficulties coding any of the variables. After this, the data will be extracted from the full set of studies by one reviewer. A second member of the review team will second code a subset of the included articles (at least 10%) and levels of agreement will be calculated. Any disagreements will be resolved through discussion, with a third member of the review team acting as arbiter for any outstanding disagreements. The review team will extract meta-data pertaining to source characteristics (e.g., publication status and year,), as well as data relating to the characteristics of the sample (e.g., age, type of sleep/mental health problem etc.), the study (e.g., nature of the comparison group, length of follow-up etc.), and characteristics of the intervention (e.g., theoretical basis, delivery modality etc.) (see Table 2 for an overview of potential moderators that we will code and examine).

## 205 **Proposed Analysis**

206 Review Manager 5.3 Cochrane Collaboration,<sup>44</sup> will be used to compute Hedges  $g$  using  
207 the post-treatment means and standard deviations for each variable reflecting sleep quality,  
208 mental health and wellbeing reported in studies comparing outcomes between an intervention  
209 group (i.e., a group receiving an intervention that improves sleep) and a comparison group (e.g.,  
210 wait-list, placebo, treatment as usual etc.). Where a study reports multiple outcome measures  
211 under one diagnostic category (e.g., several measures of depression), the effect sizes will be  
212 computed for each outcome and meta-analyzed in their own right to form one overall effect for  
213 inclusion in the main analysis. Where means and standard deviations are not reported and it is  
214 not possible to compute Hedges  $g$  from the data provided in the report (e.g., test statistics,  
215 confidence intervals etc.), then we will attempt to contact the author(s) for this information.

216 The sample-weighted average effect size ( $g_+$ ) will be computed using a random effects  
217 model as studies are likely to be “different from one another in ways too complex to capture by a  
218 few simple study characteristics”<sup>45</sup>. Following Cohen’s<sup>46</sup> recommendations,  $g = 0.20$  will be  
219 taken to represent a ‘small’ effect size,  $g = 0.50$  a ‘medium’ effect size, and  $g = 0.80$  a ‘large’  
220 effect size. We will use these qualitative indices to interpret the findings. Publication bias will be  
221 assessed via visual inspection of a funnel plot and Egger’s test<sup>47</sup>. Finally, Orwin’s<sup>48</sup> formula will  
222 be used to determine the fail-safe  $n$  (i.e., the number of studies producing a null effect that would  
223 be needed to reduce the overall effect of interventions that improve sleep on outcomes relating to  
224 mental health and wellbeing to a trivial effect size).

## 225 **Heterogeneity, Bias and Study Quality**

226 The  $I^2$  statistic will be used to assess heterogeneity across all the primary studies<sup>49</sup>. The  
227 quality of each individual study included in the present review will be assessed using the Jadad

## Does Improving Sleep Lead to Better Mental Health and Wellbeing?

12

1  
2  
3  
4 228 scale for reporting randomized controlled trials<sup>50</sup>. The Jadad scale assesses three key areas of  
5  
6 229 methodological quality that potentially impact the risk of bias – namely; randomization, blinding  
7  
8 230 and the flow of participants through the study. In order to assess these areas, raters will be asked  
9  
10 231 to answer three questions including: i) “*Was the study described as randomized (this includes the*  
11  
12 232 *use of words such as randomly, random, and randomization)*”; ii) “*Was the study described as*  
13  
14 233 *double blind?*”; and iii) “*Was there a description of withdrawals and dropouts?*”. Scores on the  
15  
16 234 Jadad scale range from 0 to 5, with higher scores indicating a lower risk of bias (and therefore  
17  
18 235 higher methodological quality). The Jadad scale for reporting randomized controlled trials has  
19  
20 236 been extensively used as a measure of the methodological quality of RCTs (having received over  
21  
22 237 7,500 citations to date) and has been recommended as the most reliable and valid scale for  
23  
24 238 assessing the quality of RCTs, in a review of 21 measures<sup>51</sup>. Finally, the Grading of  
25  
26 239 Recommendations Assessment, Development, and Evaluation (GRADE) system<sup>52 53</sup> will be used  
27  
28 240 to assess the quality of the body of evidence as a whole investigating the effect of interventions  
29  
30 241 to improve sleep on mental health and wellbeing.

### 242 Moderation Analysis

31  
32 243 Moderation analyses will be performed to identify the variables that influence the effect  
33  
34 244 of interventions that improve sleep on both sleep outcomes, as well as those relating to mental  
35  
36 245 health and wellbeing. For continuous moderators (e.g., age, publication year, study quality etc.),  
37  
38 246 sample weighted meta-regression will be used to investigate the impact of the moderator on  
39  
40 247 effect sizes. For categorical variables (e.g., self-report vs. objective outcome measures, the nature  
41  
42 248 of the comparison condition etc.), the sample weighted mean effect size  $g$  and associated  
43  
44 249 standard errors will be computed for each level of the moderator and the  $Q$  statistic will be used  
45  
46 250 to assess if the difference is statistically significant.

Does Improving Sleep Lead to Better Mental Health and Wellbeing?

13

1  
2  
3  
4 251 **Ethics and Dissemination**

5  
6 252 As the proposed research is a meta-analytic review of primary studies, no ethical  
7  
8 253 approval is required. We have registered the proposed review on the PROSPERO database in  
9  
10 254 order to adhere to the principles of open research. Following completion of the review, we aim to  
11  
12 255 publish the findings in a peer reviewed academic journal and attend conferences and  
13  
14 256 dissemination events with stakeholders where possible.  
15  
16

17  
18 257 **Author Contributions**

19  
20 258 The first author (AJS) had the idea for the proposed review and approached TLW and  
21  
22 259 GR, who contributed to the design of the research. AJS drafted the protocol and TLW and GR  
23  
24 260 provided detailed comments before submission. AJS is the identified guarantor of the review.  
25  
26

27 261 **Funding Statement**

28  
29  
30 262 This research has not yet received any funding from the public, commercial or not-for-  
31  
32 263 profit sectors.  
33

34 264 **Competing Interests**

35  
36  
37 265 There are no competing interests.  
38  
39  
40  
41  
42  
43  
44  
45  
46  
47  
48  
49  
50  
51  
52  
53  
54  
55  
56  
57  
58  
59  
60

1  
2  
3  
4 266**References**

- 5  
6 267 1. Colten HR, Altevogt BM. Sleep disorders and sleep deprivation: An unmet public health  
7  
8 268 problem: National Academies Press 2006.
- 9  
10 269 2. Patel V, Flisher AJ, Hetrick S, et al. Mental health of young people: A global public-health  
11  
12 270 challenge. *The Lancet* 2007;369(9569):1302-13.
- 13  
14 271 3. Robotham D. Sleep as a public health concern: Insomnia and mental health. *Journal of Public*  
15  
16 272 *Mental Health* 2011;10(4):234-37.
- 17  
18 273 4. Prince M, Patel V, Saxena S, et al. No health without mental health. *The lancet*  
19  
20 274 2007;370(9590):859-77.
- 21  
22 275 5. Ford DE, Kamerow DB. Epidemiologic study of sleep disturbances and psychiatric disorders:  
23  
24 276 An opportunity for prevention? *Jama* 1989;262(11):1479-84.
- 25  
26 277 6. Baglioni C, Nanovska S, Regen W, et al. Sleep and mental disorders: A meta-analysis of  
27  
28 278 polysomnographic research. *Psychological Bulletin* 2016;14:14.
- 29  
30 279 7. Benca RM, Obermeyer WH, Thisted RA, et al. Sleep and psychiatric disorders: A meta-  
31  
32 280 analysis. *Archives of general psychiatry* 1992;49(8):651-68.
- 33  
34 281 8. Baglioni C, Battagliese G, Feige B, et al. Insomnia as a predictor of depression: A meta-  
35  
36 282 analytic evaluation of longitudinal epidemiological studies. *Journal of affective disorders*  
37  
38 283 2011;135(1):10-19.
- 39  
40 284 9. Gregory AM, Rijsdijk FV, Lau J, et al. The direction of longitudinal associations between  
41  
42 285 sleep problems and depression symptoms: A study of twins aged 8 and 10 years. *Sleep*  
43  
44 286 2009;32(2):189-99.
- 45  
46  
47  
48  
49  
50  
51  
52  
53  
54  
55  
56  
57  
58  
59  
60



## Does Improving Sleep Lead to Better Mental Health and Wellbeing?

15

- 1  
2  
3  
4 287 10. Breslau N, Roth T, Rosenthal L, et al. Sleep disturbance and psychiatric disorders: A  
5  
6 288 longitudinal epidemiological study of young adults. *Biological psychiatry*  
7  
8 289 1996;39(6):411-18.  
9  
10  
11 290 11. Harvey AG. Insomnia: Symptom or diagnosis? *Clinical psychology review* 2001;21(7):1037-  
12  
13 291 59.  
14  
15 292 12. Soehner AM, Kaplan KA, Harvey AG. Insomnia comorbid to severe psychiatric illness. *Sleep*  
16  
17 293 *medicine clinics* 2013;8(3):361-71.  
18  
19  
20 294 13. Freeman D, Stahl D, McManus S, et al. Insomnia, worry, anxiety and depression as  
21  
22 295 predictors of the occurrence and persistence of paranoid thinking. *Social psychiatry and*  
23  
24 296 *psychiatric epidemiology* 2012;47(8):1195-203.  
25  
26  
27 297 14. Cuijpers P, Van Straten A, Andersson G. Internet-administered cognitive behavior therapy for  
28  
29 298 health problems: A systematic review. *Journal of behavioral medicine* 2008;31(2):169-  
30  
31 299 77.  
32  
33  
34 300 15. Wu JQ, Appleman ER, Salazar RD, et al. Cognitive behavioral therapy for insomnia  
35  
36 301 comorbid with psychiatric and medical conditions a meta-analysis. *Jama Internal*  
37  
38 302 *Medicine* 2015;175(9):1461-72. doi: 10.1001/jamainternmed.2015.3006  
39  
40  
41 303 16. Ho FY, Chung KF, Yeung WF, et al. Self-help cognitive-behavioral therapy for insomnia: A  
42  
43 304 meta-analysis of randomized controlled trials. *Sleep Medicine Reviews* 2015;19:17-28.  
44  
45  
46 305 17. van Straten A, Cuijpers P. Self-help therapy for insomnia: A meta-analysis. *Sleep Medicine*  
47  
48 306 *Reviews* 2009;13(1):61-71. doi: 10.1016/j.smr.2008.04.006  
49  
50  
51 307 18. Koffel EA, Koffel JB, Gehrman PR. A meta-analysis of group cognitive behavioral therapy  
52  
53 308 for insomnia. *Sleep Medicine Reviews* 2015;19:6-16. doi: 10.1016/j.smr.2014.05.001  
54  
55  
56  
57  
58  
59  
60

## Does Improving Sleep Lead to Better Mental Health and Wellbeing?

16

- 1  
2  
3  
4 309 19. Lovato N, Gradisar M. A meta-analysis and model of the relationship between sleep and  
5  
6 310 depression in adolescents: Recommendations for future research and clinical practice.  
7  
8 311 *Sleep Medicine Reviews* 2014;18(6):521-9.
- 9  
10 312 20. Chan MS, Chung KF, Yung KP, et al. Sleep in schizophrenia: A systematic review and meta-  
11  
12 313 analysis of polysomnographic findings in case-control studies. *Sleep Medicine Reviews*  
13  
14 314 2016;10:10.
- 15  
16  
17 315 21. Kobayashi I, Boarts JM, Delahanty DL. Polysomnographically measured sleep abnormalities  
18  
19 316 in ptsd: A meta-analytic review. *Psychophysiology* 2007;44(4):660-9.
- 20  
21 317 22. Nota JA, Sharkey KM, Coles ME. Sleep, arousal, and circadian rhythms in adults with  
22  
23 318 obsessive-compulsive disorder: A meta-analysis. *Neuroscience & Biobehavioral Reviews*  
24  
25 319 2015;51:100-7.
- 26  
27 320 23. Reeve S, Sheaves B, Freeman D. The role of sleep dysfunction in the occurrence of delusions  
28  
29 321 and hallucinations: A systematic review. *Clinical psychology review* 2015;42:96-115.
- 30  
31 322 24. Belleville G, Cousineau H, Levrier K, et al. Meta-analytic review of the impact of cognitive-  
32  
33 323 behavior therapy for insomnia on concomitant anxiety. *Clinical Psychology Review*  
34  
35 324 2011;31(4):638-52. doi: 10.1016/j.cpr.2011.02.004
- 36  
37 325 25. Benca RM, Obermeyer WH, Thisted RA, et al. Sleep and psychiatric-disorders - a  
38  
39 326 metaanalysis. *Archives of General Psychiatry* 1992;49(8):651-68.
- 40  
41 327 26. Baglioni C, Nanovska S, Regen W, et al. Sleep and mental disorders: A meta-analysis of  
42  
43 328 polysomnographic research. *Psychological Bulletin* 2016;142(9):969-90. doi:  
44  
45 329 10.1037/bul0000053
- 46  
47 330 27. Chouinard S, Poulin J, Stip E, et al. Sleep in schizophrenia: A meta-analysis. *Schizophrenia*  
48  
49 331 *Research* 2001;49(1-2):200-00.
- 50  
51  
52  
53  
54  
55  
56  
57  
58  
59  
60

## Does Improving Sleep Lead to Better Mental Health and Wellbeing?

17

- 1  
2  
3  
4 332 28. Diaz-Roman A, Perestelo-Perez L, Buela-Casal G. Sleep in obsessive-compulsive disorder: A  
5  
6 333 systematic review and meta-analysis. *Sleep Medicine* 2015;16(9):1049-55. doi:  
7  
8 334 10.1016/j.sleep.2015.03.020  
9  
10 335 29. Cole MG, Dendukuri N. Risk factors for depression among elderly community subjects: A  
11  
12 336 systematic review and meta-analysis. *American Journal of Psychiatry* 2003;160(6):1147-  
13  
14 337 56. doi: 10.1176/appi.ajp.160.6.1147  
15  
16 338 30. Lovato N, Gradisar M. A meta-analysis and model of the relationship between sleep and  
17  
18 339 depression in adolescents: Recommendations for future research and clinical practice.  
19  
20 340 *Sleep Medicine Reviews* 2014;18(6):521-29. doi: 10.1016/j.smr.2014.03.006  
21  
22 341 31. Zhai L, Zhang H, Zhang D. Sleep duration and depression among adults: A meta-analysis of  
23  
24 342 prospective studies. *Depression and Anxiety* 2015;32(9):664-70. doi: 10.1002/da.22386  
25  
26 343 32. Mauro R. Understanding love (left out variables error): A method for estimating the effects of  
27  
28 344 omitted variables. *Psychological Bulletin* 1990;108(2):314.  
29  
30 345 33. Zapf D, Dormann C, Frese M. Longitudinal studies in organizational stress research: A  
31  
32 346 review of the literature with reference to methodological issues. *Journal of occupational*  
33  
34 347 *health psychology* 1996;1(2):145.  
35  
36 348 34. Duckworth AL, Tsukayama E, May H. Establishing causality using longitudinal hierarchical  
37  
38 349 linear modeling: An illustration predicting achievement from self-control. *Social*  
39  
40 350 *psychological and personality science* 2010  
41  
42 351 35. Ho FY-Y, Chung K-F, Yeung W-F, et al. Self-help cognitive-behavioral therapy for insomnia:  
43  
44 352 A meta-analysis of randomized controlled trials. *Sleep Medicine Reviews* 2015;19:17-28.  
45  
46 353 doi: 10.1016/j.smr.2014.06.010  
47  
48  
49  
50  
51  
52  
53  
54  
55  
56  
57  
58  
59  
60

## Does Improving Sleep Lead to Better Mental Health and Wellbeing?

18

- 1  
2  
3  
4 354 36. Tang NKY, Lereya ST, Boulton H, et al. Nonpharmacological treatments of insomnia for  
5  
6 355 long-term painful conditions: A systematic review and meta-analysis of patient-reported  
7  
8 356 outcomes in randomized controlled trials. *Sleep* 2015;38(11):1751-+. doi:  
9  
10 357 10.5665/sleep.5158  
11  
12  
13 358 37. Okajima I, Komada Y, Inoue Y. A meta-analysis on the treatment effectiveness of cognitive  
14  
15 359 behavioral therapy for primary insomnia. *Sleep and Biological Rhythms* 2011;9(1):24-34.  
16  
17 360 doi: 10.1111/j.1479-8425.2010.00481.x  
18  
19  
20 361 38. Hansen K, Hoefling V, Kroener-Borowik T, et al. Efficacy of psychological interventions  
21  
22 362 aiming to reduce chronic nightmares: A meta-analysis. *Clinical Psychology Review*  
23  
24 363 2013;33(1):146-55. doi: 10.1016/j.cpr.2012.10.012  
25  
26  
27 364 39. Gupta MA, Simpson FC, Lyons DCA. The effect of treating obstructive sleep apnea with  
28  
29 365 positive airway pressure on depression and other subjective symptoms: A systematic  
30  
31 366 review and meta-analysis. *Sleep Medicine Reviews* 2016;28:55-68. doi:  
32  
33 367 10.1016/j.smrv.2015.07.002  
34  
35  
36  
37 368 40. Ho FY-Y, Chan CS, Tang KN-S. Cognitive-behavioral therapy for sleep disturbances in  
38  
39 369 treating posttraumatic stress disorder symptoms: A meta-analysis of randomized  
40  
41 370 controlled trials. *Clinical Psychology Review* 2016;43:90-102. doi:  
42  
43 371 10.1016/j.cpr.2015.09.005  
44  
45  
46 372 41. Shamseer L, Moher D, Clarke M, et al. Preferred reporting items for systematic review and  
47  
48 373 meta-analysis protocols (prisma-p) 2015: Elaboration and explanation. *Bmj*  
49  
50 374 2015;349:g7647.  
51  
52  
53  
54  
55  
56  
57  
58  
59  
60

## Does Improving Sleep Lead to Better Mental Health and Wellbeing?

19

- 1  
2  
3  
4 375 42. Robinson KA, Dickersin K. Development of a highly sensitive search strategy for the  
5  
6 376 retrieval of reports of controlled trials using pubmed. *International journal of*  
7  
8 377 *epidemiology* 2002;31(1):150-53.
- 10 378 43. Moher D, Liberati A, Tetzlaff J, et al. Preferred reporting items for systematic reviews and  
11  
12 379 meta-analyses: The prisma statement. *Journal of Clinical Epidemiology*  
13  
14 380 2009;62(10):1006-12. doi: 10.1016/j.jclinepi.2009.06.005
- 17 381 44. Collaboration C. Review manager (revman)[computer program] version 5.2. 3. Copenhagen:  
18  
19 382 The nordic cochrane centre; 2012, 2014.
- 22 383 45. Cooper HM. Integrating research: A guide for literature reviews. London, England: Sage  
23  
24 384 1986.
- 27 385 46. Cohen J. A power primer. *Psychological bulletin* 1992;112(1):155.
- 30 386 47. Egger M, Smith GD, Schneider M, et al. Bias in meta-analysis detected by a simple,  
31  
32 387 graphical test. *Bmj* 1997;315(7109):629-34.
- 34 388 48. Orwin RG. A fail-safe n for effect size in meta-analysis. *Journal of educational statistics*  
35  
36 389 1983:157-59.
- 39 390 49. Higgins JP, Thompson SG, Deeks JJ, et al. Measuring inconsistency in meta-analyses. *Bmj*  
40  
41 391 2003;327(7414):557-60.
- 44 392 50. Jadad AR, Moore RA, Carroll D, et al. Assessing the quality of reports of randomized clinical  
45  
46 393 trials: Is blinding necessary? *Controlled clinical trials* 1996;17(1):1-12.
- 48 394 51. Olivo SA, Macedo LG, Gadotti IC, et al. Scales to assess the quality of randomized  
49  
50 395 controlled trials: A systematic review. *Physical therapy* 2007

## Does Improving Sleep Lead to Better Mental Health and Wellbeing?

20

- 1  
2  
3  
4 396 52. Guyatt G, Oxman AD, Akl EA, et al. Grade guidelines: 1. Introduction: Grade evidence  
5  
6 397 profiles and summary of findings tables. *Journal of Clinical Epidemiology*  
7  
8 398 2011;64(4):383-94. doi: 10.1016/j.jclinepi.2010.04.026  
9  
10  
11 399 53. Guyatt GH, Oxman AD, Vist GE, et al. Grade: An emerging consensus on rating quality of  
12  
13 400 evidence and strength of recommendations. *BMJ: British Medical Journal*  
14  
15 401 2008;336(7650):924.  
16  
17  
18 402

403 **Table 1**

404 *Search Terms that will be Used to Identify Randomized Controlled Trials of Interventions*  
 405 *Designed to Improve Sleep on Mental Health Outcomes*

| 406 | <b>HSSS for RCTs<sup>a</sup></b> | <b>Sleep quality / disorders</b> | <b>Mental health and wellbeing</b> |
|-----|----------------------------------|----------------------------------|------------------------------------|
| 407 | Randomized controlled trial      | Sleep*                           | “Psychological health”             |
| 408 | Controlled clinical trial        | “Circadian rhythm*”              | Wellbeing                          |
| 409 | Randomized                       | Insomnia                         | Distress                           |
| 410 | Placebo                          | Hypersomnia                      | “Mental”                           |
| 411 | Drug therapy                     | Parasomnia                       | Psychiat*                          |
| 412 | Randomly                         | Narcolepsy                       | Affect                             |
| 413 | Trial                            | Apnea                            | Depress*                           |
| 414 | Groups                           | Apnoea                           | Mood                               |
| 415 |                                  | Nightmare*                       | Stress                             |
| 416 |                                  | “Restless legs syndrome”         | Anxi*                              |
| 417 |                                  |                                  | Phobi*                             |
| 418 |                                  |                                  | “Obsessive compulsive disorder”    |
| 419 |                                  |                                  | OCD                                |
| 420 |                                  |                                  | Psychos*s                          |
| 421 |                                  |                                  | Psychotic                          |
| 422 |                                  |                                  | Schiz*                             |
| 423 |                                  |                                  | Bipolar                            |
| 424 |                                  |                                  | Hallucination*                     |
| 425 |                                  |                                  | Delusion*                          |
| 426 |                                  |                                  | “Eating disturbance*”              |
| 427 |                                  |                                  | Anorexia                           |
| 428 |                                  |                                  | Bulimia                            |
| 429 |                                  |                                  | “Binge eating”                     |

430 *Notes: \* = Indicates that variants of the word after the asterisk will be searched for (e.g.,*

431 *depress\* will search for depressive etc.),*

432 <sup>a</sup> The Highly sensitive Search Strategy (HSSS) is more than just a key word search, rather it

433 *encompasses search techniques and strategies.*

Does Improving Sleep Lead to Better Mental Health and Wellbeing?

22

434 **Table 2**435 *Variables to be Extracted for Moderation Analysis (where applicable)*

| 436 | <b>Source characteristics</b> | <b>Sample characteristics</b>    | <b>Study characteristics</b>  | <b>Intervention characteristics</b> |
|-----|-------------------------------|----------------------------------|-------------------------------|-------------------------------------|
| 437 | Publication status            | Age                              | Nature of comparison group(s) | Theoretical basis                   |
| 438 | Publication year              | Gender                           | Attrition/drop-out rate       | Delivery modality                   |
| 439 | Journal name                  | Type of mental health problem(s) | Methodological quality        | Duration                            |
| 440 | Journal impact factor         | Type of sleep problem(s)         | Timing of follow-up           | Self-help vs. face-to-face          |
| 441 |                               | Clinical status                  | Method of recruitment         | Adherence                           |
| 442 |                               | Comorbidity                      | Measure(s) of sleep           |                                     |
| 443 |                               | Measure of mental health         | Measure(s) of mental health   |                                     |
| 444 |                               | Concurrent medication use        | Study quality                 |                                     |
| 445 |                               | Concurrent psychological help    |                               |                                     |



1  
2  
3  
4  
5  
6  
7  
8  
9  
10  
11  
12  
13  
14  
15  
16  
17  
18  
19  
20  
21  
22  
23  
24  
25  
26  
27  
28  
29  
30  
31  
32  
33  
34  
35  
36  
37  
38  
39  
40  
41  
42  
43  
44  
45  
46  
47  
48  
49

**Supplementary Materials 1**

*PRISMA-P Checklist*

**PRISMA-P (Preferred Reporting Items for Systematic review and Meta-Analysis Protocols) 2015 checklist: recommended items to address in a systematic review protocol\***

Page and line numbers, emboldened and in parentheses, indicate the location of the PRISMA-P item in the corresponding manuscript.

| Section and topic                 | Item No | Checklist item                                                                                                                                                                                              |
|-----------------------------------|---------|-------------------------------------------------------------------------------------------------------------------------------------------------------------------------------------------------------------|
| <b>ADMINISTRATIVE INFORMATION</b> |         |                                                                                                                                                                                                             |
| Title:                            |         |                                                                                                                                                                                                             |
| Identification                    | 1a      | Identify the report as a protocol of a systematic review <b>(p. 1)</b>                                                                                                                                      |
| Update                            | 1b      | If the protocol is for an update of a previous systematic review, identify as such <b>(NA)</b>                                                                                                              |
| Registration                      | 2       | If registered, provide the name of the registry (such as PROSPERO) and registration number <b>(p. 1)</b>                                                                                                    |
| Authors:                          |         |                                                                                                                                                                                                             |
| Contact                           | 3a      | Provide name, institutional affiliation, e-mail address of all protocol authors; provide physical mailing address of corresponding author <b>(p. 1)</b>                                                     |
| Contributions                     | 3b      | Describe contributions of protocol authors and identify the guarantor of the review <b>(p. 13)</b>                                                                                                          |
| Amendments                        | 4       | If the protocol represents an amendment of a previously completed or published protocol, identify as such and list changes; otherwise, state plan for documenting important protocol amendments <b>(NA)</b> |
| Support:                          |         |                                                                                                                                                                                                             |
| Sources                           | 5a      | Indicate sources of financial or other support for the review <b>(p. 13)</b>                                                                                                                                |
| Sponsor                           | 5b      | Provide name for the review funder and/or sponsor <b>(NA)</b>                                                                                                                                               |
| Role of sponsor or funder         | 5c      | Describe roles of funder(s), sponsor(s), and/or institution(s), if any, in developing the protocol <b>(NA)</b>                                                                                              |
| <b>INTRODUCTION</b>               |         |                                                                                                                                                                                                             |
| Rationale                         | 6       | Describe the rationale for the review in the context of what is already known <b>(p.4-7)</b>                                                                                                                |
| Objectives                        | 7       | Provide an explicit statement of the question(s) the review will address with reference to participants, interventions, comparators, and outcomes (PICO) <b>(p. 7)</b>                                      |
| <b>METHODS</b>                    |         |                                                                                                                                                                                                             |

|                                    |     |                                                                                                                                                                                                                                                             |
|------------------------------------|-----|-------------------------------------------------------------------------------------------------------------------------------------------------------------------------------------------------------------------------------------------------------------|
| Eligibility criteria               | 8   | Specify the study characteristics (such as PICO, study design, setting, time frame) and report characteristics (such as years considered, language, publication status) to be used as criteria for eligibility for the review (p. 8-9)                      |
| Information sources                | 9   | Describe all intended information sources (such as electronic databases, contact with study authors, trial registers or other grey literature sources) with planned dates of coverage (p. 9)                                                                |
| Search strategy                    | 10  | Present draft of search strategy to be used for at least one electronic database, including planned limits, such that it could be repeated (see Supplementary Materials 2)                                                                                  |
| Study records:                     |     |                                                                                                                                                                                                                                                             |
| Data management                    | 11a | Describe the mechanism(s) that will be used to manage records and data throughout the review (p. 10)                                                                                                                                                        |
| Selection process                  | 11b | State the process that will be used for selecting studies (such as two independent reviewers) through each phase of the review (that is, screening, eligibility and inclusion in meta-analysis) (p. 10)                                                     |
| Data collection process            | 11c | Describe planned method of extracting data from reports (such as piloting forms, done independently, in duplicate), any processes for obtaining and confirming data from investigators (p. 10)                                                              |
| Data items                         | 12  | List and define all variables for which data will be sought (such as PICO items, funding sources), any pre-planned data assumptions and simplifications (see Table 2)                                                                                       |
| Outcomes and prioritization        | 13  | List and define all outcomes for which data will be sought, including prioritization of main and additional outcomes, with rationale (p.11. See also Table 2, p. 22)                                                                                        |
| Risk of bias in individual studies | 14  | Describe anticipated methods for assessing risk of bias of individual studies, including whether this will be done at the outcome or study level, or both; state how this information will be used in data synthesis (p. 11-12)                             |
| Data synthesis                     | 15a | Describe criteria under which study data will be quantitatively synthesised (p.11)                                                                                                                                                                          |
|                                    | 15b | If data are appropriate for quantitative synthesis, describe planned summary measures, methods of handling data and methods of combining data from studies, including any planned exploration of consistency (such as $I^2$ , Kendall's $\tau$ ) (p. 11-12) |
|                                    | 15c | Describe any proposed additional analyses (such as sensitivity or subgroup analyses, meta-regression) (p. 12)                                                                                                                                               |
|                                    | 15d | If quantitative synthesis is not appropriate, describe the type of summary planned (NA)                                                                                                                                                                     |
| Meta-bias(es)                      | 16  | Specify any planned assessment of meta-bias(es) (such as publication bias across studies, selective reporting within studies) (p. 11-12)                                                                                                                    |
| Confidence in cumulative evidence  | 17  | Describe how the strength of the body of evidence will be assessed (such as GRADE) (p. 12)                                                                                                                                                                  |

**\* It is strongly recommended that this checklist be read in conjunction with the PRISMA-P Explanation and Elaboration (cite when available) for important clarification on the items. Amendments to a review protocol should be tracked and dated. The copyright for PRISMA-P (including checklist) is held by the PRISMA-P Group and is distributed under a Creative Commons Attribution Licence 4.0.**

*From: Shamseer L, Moher D, Clarke M, Ghersi D, Liberati A, Petticrew M, Shekelle P, Stewart L, PRISMA-P Group. Preferred reporting items for systematic review and meta-analysis protocols (PRISMA-P) 2015: elaboration and explanation. BMJ. 2015 Jan 2;349(jan02 1):g7647.*

## Supplementary Materials 2

### *Ovid Medline Example Search Strategy*

---

Database: Ovid MEDLINE(R) Epub Ahead of Print, In-Process & Other Non-Indexed Citations, Ovid MEDLINE(R) Daily, Ovid MEDLINE and Versions(R)

Search Strategy:

-----

- 1 (Sleep\$ or Insomnia\$ or nightmare\$ or hypersomnia\$ or parasomnia\$ or narcolepsy or circadian rhythm\$ or restless leg syndrome or apnea or apnoea).ti,ab. (180111)
- 2 Sleep/ or Sleep Disorders, Circadian Rhythm/ or Sleep Disorders, Intrinsic/ or Narcolepsy/ or Restless Legs Syndrome/ or Sleep Apnea Syndromes/ or "Sleep Initiation and Maintenance Disorders"/ or Parasomnias/ (70224)
- 3 1 or 2 (193630)
- 4 (psychological health or distress or mental or psychiat\$ or affect or depress\$ or mood or stress or anxious or anxiety or phobi\$ or obsessive compulsive disorder\$ or OCD or psychos#s or psychotic or schiz\$ or bipolar or bi-polar or hallucination\$ or delusion\$ or eating disorder\$ or eating disturbance\$ or anorexia or bulimia or binge eating or wellbeing or well-being or QoL or quality of life).ti,ab. (2200869)
- 5 Stress, Psychological/ or Anxiety Disorders/ or Obsessive-Compulsive Disorder/ or Phobic Disorders/ or exp "Feeding and Eating Disorders"/ or Anorexia Nervosa/ or Binge-Eating Disorder/ or Bulimia Nervosa/ or Depressive Disorder/ or Hallucinations/ or Delusions/ or Anxiety/ or Depression/ or psychotic disorders/ (379929)
- 6 4 or 5 (2283788)
- 7 3 and 6 (57412)
- 8 randomized controlled trial.pt. (446587)
- 9 controlled clinical trial.pt. (91788)
- 10 randomized.ab. (389502)
- 11 placebo.ab. (183719)
- 12 drug therapy.fs. (1928261)
- 13 randomly.ab. (270741)
- 14 trial.ab. (409336)

- 15 groups.ab. (1670961)
- 16 or/8-15 (3972831)
- 17 exp animals/ not humans.sh. (4311313)
- 18 16 not 17 (3433652)
- 19 7 and 18 (19379)
- 20 (trial\$ or intervention\$ or treatment\$).ti,ab. (4565976)
- 21 7 and 20 (23924)
- 22 21 not 19 (11896)

\*\*\*\*\*

Data extraction form

Study ID:

|  |  |  |
|--|--|--|
|  |  |  |
|--|--|--|

Please consult the '**data extraction coding manual**' for instructions on how to code each.

### Article meta-data

1. Please state the surnames and first initials of **all** authors of the article (e.g., Smith, J. A., Jones, A. C.);

2. Please state the year that the article was first published:

|  |  |  |  |
|--|--|--|--|
|  |  |  |  |
|--|--|--|--|

3. What is the publication status of the article?  Published (move to Q3.1)

Unpublished (move to Q4)

- 3.1. Please state the name of the journal that the article was published in:

### Nature of the focal sample

4. State the mean age of the intervention group(s) to the nearest year at baseline:

5. State the percentage of the intervention group(s) that are female at baseline

6. Indicate the clinical status of the **mental health problems** of participants **included** in the study:

Clinical     Non-clinical     Mixed     Not known

## Data extraction form

Study ID:

|  |  |  |
|--|--|--|
|  |  |  |
|--|--|--|

1  
2  
3  
4  
5  
6  
7  
8  
9  
10  
11  
12  
13  
14  
15  
16  
17  
18  
19  
20  
21  
22  
23  
24  
25  
26  
27  
28  
29  
30  
31  
32  
33  
34  
35  
36  
37  
38  
39  
40  
41  
42  
43  
44  
45  
46  
47  
48  
49  
50  
51  
52  
53  
54  
55  
56  
57  
58  
59  
60

7. Indicate the clinical status of the **sleep related problems** of participants **included** in the study:

Clinical     Non-clinical     Mixed     Not known

8. What **mental-health difficulties**, symptoms or problems experienced by the participants were recorded by the study authors? Please provide details:

|  |
|--|
|  |
|--|

9. What the **sleep related difficulties**, symptoms or problems experienced by the participants were recorded by the study authors? Please provide details:

|  |
|--|
|  |
|--|

10. Did the focal sample have comorbid conditions in addition to sleep and/or mental health difficulties? An example would be alcohol dependency among those with anxiety and depression. Please record this where applicable:

|  |
|--|
|  |
|--|

11. Were the participants taking medication for a **mental health difficulty** in addition to the intervention being tested? If yes provide details; if no, please state NA.

Study ID: 

|  |  |  |
|--|--|--|
|  |  |  |
|--|--|--|

**Data extraction form**

1  
2  
3  
4  
5  
6  
7  
8  
9  
10  
11  
12  
13  
14  
15  
16  
17  
18  
19  
20  
21  
22  
23  
24  
25  
26  
27  
28  
29  
30  
31  
32  
33  
34  
35  
36  
37  
38  
39  
40  
41  
42  
43  
44  
45  
46  
47  
48  
49  
50  
51  
52  
53  
54  
55  
56  
57  
58  
59  
60

12. Were the participants taking medication for a **sleep difficulty** in addition to the intervention being tested? If yes provide details; if no, please state NA.

13. Were the participants receiving psychological help for a **mental health difficulty** in addition to the intervention being tested? If yes provide details in the box below, if no please state NA;

14. Were the participants receiving psychological help for a **sleep difficulty** in addition to the intervention being tested? If yes, provide details; if no, please state NA:

**Research design**

15. How were the participants recruited to the study?

16. Please state the nature of the comparison group(s) (i.e., the group(s) that the intervention group is compared to);

Data extraction form

Study ID:

|  |  |  |
|--|--|--|
|  |  |  |
|--|--|--|

17. State the number of participants in the intervention group(s) who have dropped out of the trial between baseline and each follow-up point recorded. Please express this as a percentage of the number of participants at baseline. If no data is reported, then please state 'not reported'.

18. Record all points where data collection has occurred after the intervention has ended in months (e.g., post-intervention, 3 months, 12 months);

19. Please record the outcome measure(s) **used to measure sleep quality** and indicate whether the measures are self-reported, clinician rated, or objective;

Self-report     Clinician     Objective

Self-report     Clinician     Objective

Self-report     Clinician     Objective

Self-report     Clinician     Objective

20. Please record the outcome measure(s) **used to record outcomes pertaining to mental health and / or wellbeing** and indicate whether the measures are self-reported or rated by a clinician rated.

Self-report     Clinician

Self-report     Clinician

1  
2  
3  
4  
5  
6  
7  
8  
9  
10  
11  
12  
13  
14  
15  
16  
17  
18  
19  
20  
21  
22  
23  
24  
25  
26  
27  
28  
29  
30  
31  
32  
33  
34  
35  
36  
37  
38  
39  
40  
41  
42  
43  
44  
45  
46  
47  
48  
49  
50  
51  
52  
53  
54  
55  
56  
57  
58  
59  
60



Study ID:

|  |  |  |
|--|--|--|
|  |  |  |
|--|--|--|

## Data extraction form

 Self-report     Clinician

 Self-report     Clinician

21. Please use the Jadad quality scale to score the study in terms of randomization, blinding and the account of participants. Use the 'Score given' column, placing your score in the box provided. Examples and guidance on the interpretation of each item are provided in the coding manual;

| Item                    | Min-max score | Description                                                                                                                                                                            | Score given                                             |
|-------------------------|---------------|----------------------------------------------------------------------------------------------------------------------------------------------------------------------------------------|---------------------------------------------------------|
| Randomization           | 0 to 2        | 1 point if randomization is mentioned at all<br><br>1 additional point if the method of randomization is appropriate<br><br>Deduct 1 point if method of randomization is inappropriate | <input style="width: 40px; height: 30px;" type="text"/> |
| Blinding                | 0 to 2        | 1 point if blinding is mentioned<br><br>1 additional point if the method of blinding is appropriate<br><br>Deduct 1 point if the method of blinding is inappropriate                   | <input style="width: 40px; height: 30px;" type="text"/> |
| Account of Participants | 0 to 1        | The fate of all participants in the trial is known. If there are no data the reason is stated                                                                                          | <input style="width: 40px; height: 30px;" type="text"/> |

### Features of the intervention

22. Please state the theoretical approach of the intervention for each group receiving an intervention designed to improve sleep (e.g., psychological, pharmacological, medical device etc.). Use the text box below to provide as much detail as possible.

Data extraction form

Study ID:

|  |  |  |
|--|--|--|
|  |  |  |
|--|--|--|

1  
2  
3  
4  
5  
6  
7  
8  
9  
10  
11  
12  
13  
14  
15  
16  
17  
18  
19  
20  
21  
22  
23  
24  
25  
26  
27  
28  
29  
30  
31  
32  
33  
34  
35  
36  
37  
38  
39  
40  
41  
42  
43  
44  
45  
46  
47  
48  
49  
50  
51  
52  
53  
54  
55  
56  
57  
58  
59  
60

23. How was the intervention delivered to participants in each group receiving an intervention designed to improve sleep? Use the box below to provide details.

24. Please state the duration of the intervention(s) to the nearest week;

25. Please record levels of adherence to the intervention(s) where possible (e.g., the number of pages of the intervention materials read, the amount of time spent looking at the intervention). If no data on adherence is available, then please state “not reported”;

**END OF FORM**

---

1  
2  
3  
4  
5  
6  
7  
8  
9  
10  
11  
12  
13  
14  
15  
16  
17  
18  
19  
20  
21  
22  
23  
24  
25  
26  
27  
28  
29  
30  
31  
32  
33  
34  
35  
36  
37  
38  
39  
40  
41  
42  
43  
44  
45  
46  
47  
48  
49

**Supplementary Materials 4**

*Data Extraction Manual*

**Data extraction manual**

The following documents contains details regarding the data to be extracted from primary studies included in the present review. Characteristics of the source (green), sample (yellow), study (blue), and intervention (grey) are outlined here.

| Variable              | Definition for coding                                                                                                                                                                                                                                                                                                                                                                                                                                                                                                                      | Example                                                                                           |
|-----------------------|--------------------------------------------------------------------------------------------------------------------------------------------------------------------------------------------------------------------------------------------------------------------------------------------------------------------------------------------------------------------------------------------------------------------------------------------------------------------------------------------------------------------------------------------|---------------------------------------------------------------------------------------------------|
| 1. Article authors    | State the surnames and first initials of all authors of the article                                                                                                                                                                                                                                                                                                                                                                                                                                                                        | Smith, J. A., Jones, A. C.                                                                        |
| 2. Publication year   | The year that the article was first published                                                                                                                                                                                                                                                                                                                                                                                                                                                                                              | For articles published in Jan 2017, the year ‘2017’ will be recorded on the data extraction form. |
| 3. Publication status | <p>Refers to whether an article has been published in a peer reviewed academic journal or not.</p> <p>Articles reporting a study published in a peer reviewed academic journal should be coded as ‘Published’.</p> <p>Articles reporting a study that has not been published in a peer reviewed academic journal should be coded as ‘unpublished’.</p> <p>Unpublished studies include those taken from PhD theses, dissertations, or studies that have otherwise not been accepted following peer review, or submitted to peer review.</p> |                                                                                                   |

Version 1: 14/03/2017

|                                                                     |                                                                                                                                                                                                                                                                                                                                                                                                                                                                                                                                                                                           |                                                                                                                                                   |
|---------------------------------------------------------------------|-------------------------------------------------------------------------------------------------------------------------------------------------------------------------------------------------------------------------------------------------------------------------------------------------------------------------------------------------------------------------------------------------------------------------------------------------------------------------------------------------------------------------------------------------------------------------------------------|---------------------------------------------------------------------------------------------------------------------------------------------------|
| 3.1. Journal name if published                                      | State the name of the journal that the article was published in                                                                                                                                                                                                                                                                                                                                                                                                                                                                                                                           | e.g. <i>British Journal of Psychiatry</i> or <i>Psychiatry Research</i> etc.                                                                      |
| 4. Age                                                              | <p>The mean age of participants in the experimental group(s).</p> <p>Record the mean age of the participants in all of the groups who received an intervention designed to improve sleep. This may be more than one group, so, in these cases record the age of participants separately for each group.</p> <p>If mean age is not reported for the experimental group(s) alone, then report the total sample mean age. If no age data is available, state 'not reported'</p>                                                                                                              |                                                                                                                                                   |
| 5. Gender                                                           | <p>The percentage of participants in the experimental group(s) who are female.</p> <p>Record the percentage of participants who are female in all of the groups receiving an intervention designed to improve sleep. This may be more than one group, in which case record the percentage of female participants separately for each group.</p> <p>If the gender of the participants is not reported for the experimental group(s) alone, then report the percentage of participants who are female in the total sample. If no data on gender is available, then state 'not reported'</p> |                                                                                                                                                   |
| 6. Clinical status of participants' (with respect to mental health) | The mental health status of the sample should be classified as either; i) clinical; ii) non-clinical or iii) mixed                                                                                                                                                                                                                                                                                                                                                                                                                                                                        | A study investigating the impact of an intervention aimed at improving sleep on paranoid thinking might recruit participants with a DSM diagnosed |

Version 1: 14/03/2017

1  
2  
3  
4  
5  
6  
7  
8  
9  
10  
11  
12  
13  
14  
15  
16  
17  
18  
19  
20  
21  
22  
23  
24  
25  
26  
27  
28  
29  
30  
31  
32  
33  
34  
35  
36  
37  
38  
39  
40  
41  
42  
43  
44  
45  
46  
47  
48  
49

|                                                                          |                                                                                                                                                                                                                                                                                                                                                                                                                                                                                                                                                                                                                                                                                                                                                                                                                                                                                                                                               |                                                                                                                                                                                                                                                                                                                                                                                                                                                                                                                                                                                                                                                                                                                                                                                                                                                                                |
|--------------------------------------------------------------------------|-----------------------------------------------------------------------------------------------------------------------------------------------------------------------------------------------------------------------------------------------------------------------------------------------------------------------------------------------------------------------------------------------------------------------------------------------------------------------------------------------------------------------------------------------------------------------------------------------------------------------------------------------------------------------------------------------------------------------------------------------------------------------------------------------------------------------------------------------------------------------------------------------------------------------------------------------|--------------------------------------------------------------------------------------------------------------------------------------------------------------------------------------------------------------------------------------------------------------------------------------------------------------------------------------------------------------------------------------------------------------------------------------------------------------------------------------------------------------------------------------------------------------------------------------------------------------------------------------------------------------------------------------------------------------------------------------------------------------------------------------------------------------------------------------------------------------------------------|
|                                                                          | <p><b>Clinical samples</b> are those that comprise primarily of participants that have a clinical diagnosis of a mental health problem as defined by formal criteria (e.g ICD, DSM). Studies where it is explicitly stated that participants have a formal diagnoses of a mental health problem are classed as clinical. This is often defined by formal diagnostic and research criteria such as the DSM or ICD</p> <p><b>Non-clinical samples</b> are those that comprise primarily of participants that have no formal diagnosis of a mental health problem. Mental health is often studied in non-clinical samples who do not have a formal diagnosis. These participants should be classed as non-clinical.</p> <p><b>Mixed samples</b> are those that include participants who have formal clinical diagnoses and those who do not. Samples that include both clinical and non-clinical participants should be classified as mixed.</p> | <p>psychosis spectrum disorder only. As a DSM rated diagnosis is a requirement for entry into the trial, this would be coded as a <b>clinical sample</b>.</p> <p>A similar study investigating the impact of an intervention aimed at improving sleep on paranoid thinking might include participants from the general population without any formal diagnoses of a mental health problem. For example, participants might be volunteers who have responded to a media advertisement of email invitation. This would be coded as a <b>non-clinical sample</b>.</p> <p>A third study investigating the impact of an intervention aimed at improving sleep on paranoid thinking might include a mix participants with a DSM rated diagnosis (clinical) and those from the general population with no diagnosis (non-clinical). This would be coded as a <b>mixed sample</b>.</p> |
| <p>7. Clinical status of participants with respect to sleep problems</p> | <p>The clinical status of the sleep difficulties reported by the sample are coded as either; i) clinical; ii) non-clinical or iii) mixed</p> <p><b>Clinical samples</b> are those that comprise primarily of participants that have a clinical diagnosis of a sleep problem as defined by formal criteria (e.g., ICD, DSM). Studies where it is explicitly stated that participants have a formal diagnoses of a sleep problem are classed as clinical. This is often defined by formal diagnostic and research criteria such as the DSM or ICD</p>                                                                                                                                                                                                                                                                                                                                                                                           | <p>A study investigating the impact of an intervention aimed at improving sleep on depressive symptoms might recruit participants with a DSM diagnosed sleep problem (e.g. insomnia). As a DSM rated diagnosis of insomnia is a requirement for entry into the trial, this would be coded as a <b>clinical sample</b>.</p> <p>A similar study investigating the impact of an intervention aimed at improving sleep on depressive symptoms might include participants from the general population without any formal diagnoses of a sleep problem. For example, participants might be volunteers who have responded to a media</p>                                                                                                                                                                                                                                              |

|                             |                                                                                                                                                                                                                                                                                                                                                                                                                                                                                                               |                                                                                                                                                                                                                                                                                                                                                                                                                                                    |
|-----------------------------|---------------------------------------------------------------------------------------------------------------------------------------------------------------------------------------------------------------------------------------------------------------------------------------------------------------------------------------------------------------------------------------------------------------------------------------------------------------------------------------------------------------|----------------------------------------------------------------------------------------------------------------------------------------------------------------------------------------------------------------------------------------------------------------------------------------------------------------------------------------------------------------------------------------------------------------------------------------------------|
|                             | <p><b>Non-clinical samples</b> are those that comprise primarily of participants that have no formal diagnosis of a sleep problem. Sleep is often studied in non-clinical samples who do not have a formal diagnosis. These participants should be classed as non-clinical.</p> <p><b>Mixed participants</b> are those that include participants who have formal clinical diagnoses and those who do not. Samples that include both clinical and non-clinical participants should be classified as mixed.</p> | <p>advertisement of email invitation. This would be coded as a <b>non-clinical sample</b>.</p> <p>A third study investigating the impact of an intervention aimed at improving sleep on depressive symptoms might include a mix participants with a DSM rated diagnosis of a sleep problem (clinical) and those from the general population with no diagnosis of a sleep problem (non-clinical). This would be coded as a <b>mixed sample</b>.</p> |
| 8. Type of mental problems  | Record the type of mental health problems and experiences that the authors measure. Where there are multiple mental health difficulties/problems, record all that are mentioned in the text.                                                                                                                                                                                                                                                                                                                  | A study may use the GAD-7 and the BDI to measure anxiety and depression respectively at baseline and again at post-intervention. In this case, record 'anxiety' and 'depression' in the box provided.                                                                                                                                                                                                                                              |
| 9. Type of sleep problem(s) | Record the type of sleep problem(s) and experiences that the authors measure. Where there are multiple sleep difficulties/problems, record all that are mentioned in the text.                                                                                                                                                                                                                                                                                                                                | A study may use the insomnia severity scale and the PSQI to measure insomnia and sleep quality respectively at baseline and again at post-intervention. In this case, record 'insomnia' and 'sleep quality' in the box provided.                                                                                                                                                                                                                   |
| 10. Comorbidity             | Record any problems or difficulties identified by the authors that are comorbid to the targeted sleep and/or the mental health problem.                                                                                                                                                                                                                                                                                                                                                                       | An example would be an intervention designed to improve sleep in those with depression and alcohol dependency. For this review, sleep and depression would not be considered comorbid at these are the target problems of this review. However, alcohol dependency would be the comorbid problem to record in the box provided.                                                                                                                    |

1  
2  
3  
4  
5  
6  
7  
8  
9  
10  
11  
12  
13  
14  
15  
16  
17  
18  
19  
20  
21  
22  
23  
24  
25  
26  
27  
28  
29  
30  
31  
32  
33  
34  
35  
36  
37  
38  
39  
40  
41  
42  
43  
44  
45  
46  
47  
48  
49

|                                                        |                                                                                                                                                                          |                                                                                                                                                                                                                                                                                                                                                                                                                                                                                                                                                                                                                                                                                       |
|--------------------------------------------------------|--------------------------------------------------------------------------------------------------------------------------------------------------------------------------|---------------------------------------------------------------------------------------------------------------------------------------------------------------------------------------------------------------------------------------------------------------------------------------------------------------------------------------------------------------------------------------------------------------------------------------------------------------------------------------------------------------------------------------------------------------------------------------------------------------------------------------------------------------------------------------|
| <p>11. Concurrent medication use for mental health</p> | <p>Were participants allowed to take medication for a mental health difficulty that is different to the intervention being tested while taking part in the research?</p> | <p>A study may investigate the effect of improving sleep using CBTi in people with depression who are also using SSRI medication. As these participants are receiving medication for depression, in addition to receiving an intervention designed to improve sleep, they would be classed as using concurrent medication for a mental health problem.</p> <p>Alternatively, some studies may screen those using medication for a mental health problem and remove these participants before randomisation, leaving only those with depression who are not on medication for it. In which case, state that the participants are using no concurrent medication for mental health.</p> |
| <p>12. Concurrent medication use for sleep</p>         | <p>Were participants allowed to take medication for a sleep difficulty that is different to the intervention being tested while taking part in the research?</p>         | <p>A study that tests the impact of a CBTi intervention for insomnia that allows participants to continue with benzodiazepine use would be classed as allowing concurrent medication for a sleep problems.</p> <p>Alternatively, a study might screen those taking medication for a sleep problem and remove these participants before randomization. Therefore, this study does not allow participants to take medication for a sleep problem in addition to the intervention being tested. In which case, state that the participants are using no concurrent medication for sleep.</p>                                                                                             |
| <p>13. Concurrent psychological treatment</p>          | <p>Were participants receiving psychological help for a mental health difficulty that is different to the</p>                                                            | <p>A study where participants are able to continue receiving psychological help from outside of the</p>                                                                                                                                                                                                                                                                                                                                                                                                                                                                                                                                                                               |

Version 1: 14/03/2017

|                                                  |                                                                                                                                                                                                                                                                                                                                                                    |                                                                                                                                                                                                                                                                                                                                                                                                                                                                                           |
|--------------------------------------------------|--------------------------------------------------------------------------------------------------------------------------------------------------------------------------------------------------------------------------------------------------------------------------------------------------------------------------------------------------------------------|-------------------------------------------------------------------------------------------------------------------------------------------------------------------------------------------------------------------------------------------------------------------------------------------------------------------------------------------------------------------------------------------------------------------------------------------------------------------------------------------|
| for mental health                                | intervention being tested while taking part in the research?                                                                                                                                                                                                                                                                                                       | <p>study team for an anxiety problem while receiving the study intervention.</p> <p>Alternatively, some studies may screen participants who are currently receiving psychological help for a mental health problem and remove these participants before randomisation. In which case, In which case, state that the participants are receiving no concurrent psychological treatment for mental health.</p>                                                                               |
| 14. Concurrent psychological treatment for sleep | Were participants receiving psychological help for a sleep difficulty that is different to the intervention being tested while taking part in the research?                                                                                                                                                                                                        | <p>A study where participants are able to continue receiving psychological help from outside of the study team for a sleep problem while receiving the study intervention.</p> <p>Alternatively, some studies may screen participants who are currently receiving psychological help for a sleep problem and remove these participants before randomization. In which case, In which case, state that the participants are receiving no concurrent psychological treatment for sleep.</p> |
| 15. Method of recruitment                        | Record how participants were recruited and from which source(s). This could include, for example, referral by GPs into the trial or from health professionals, recruitment from volunteer email lists at University's or self-referral from the participant. A study may also use a combination of multiple recruitment methods. If so, record all where possible. | <p>Clinicians may refer participants with psychosis spectrum diagnoses from outpatient centres into the trial. In which case, record that participants were recruited by healthcare professionals from a clinical outpatient setting.</p> <p>Alternatively, participants may see advertisements and contact the study team directly. In which case, record that participants were recruited via media advertisement and self-referred to the study.</p>                                   |

Version 1: 14/03/2017



|                                |                                                                                                                                                                                         |                                                                                                                                                                                                                                                                                                                                                                                                                                                 |
|--------------------------------|-----------------------------------------------------------------------------------------------------------------------------------------------------------------------------------------|-------------------------------------------------------------------------------------------------------------------------------------------------------------------------------------------------------------------------------------------------------------------------------------------------------------------------------------------------------------------------------------------------------------------------------------------------|
| 16. Nature of comparison group | Describe the type of comparison group and provide a brief description.                                                                                                                  | Participants in a wait-list control group would receive no intervention for the duration of the study. In which case, record 'wait-list control group'<br><br>Alternatively, an intervention might be compared to treatment as usual (TAU) where participants receive the same care they would usually receive regardless of the trial. In which case, record 'treatment as usual' alongside a brief description of what treatment as usual is. |
| 17. Attrition/dropout          | The total number of participants in the intervention group(s) who have dropped out of the trial between baseline and each follow-up point recorded should be expressed as a percentage. | If a study started with a total $n = 100$ participants in the intervention group giving baseline data, and ended with $n = 75$ at post-intervention and $n = 50$ at a six month follow-up, then this would be reported as;<br><br>Post-intervention = 25% attrition<br>6 month follow-up = 50% attrition                                                                                                                                        |
| 18. Follow-up points           | Any point in the study where data has been collected following the intervention                                                                                                         | A study that collects data immediately after an intervention has been delivered and then again 3 and 12 months later would have the following follow-up points;<br><br>1. Post-intervention<br>2. 3 months<br>3. 12 months                                                                                                                                                                                                                      |
| 19. Measure of sleep           | Record the name of the measure(s) used to assess sleep. Please also record whether this measure was; i) self-reported; ii) rated by a clinician; or iii) measured objectively.          | A study that uses both polysomnography (an objective measure of sleep) and the Insomnia Severity Index (ISI, a self-report measure).<br><br>List the name of the measure (e.g.                                                                                                                                                                                                                                                                  |

Version 1: 14/03/2017

|                              |                                                                                                                                                                                                                                                                                                |                                                                                                                                                                                                                                                                                                                                                                                                                                                                                                                                                                                                                                                       |
|------------------------------|------------------------------------------------------------------------------------------------------------------------------------------------------------------------------------------------------------------------------------------------------------------------------------------------|-------------------------------------------------------------------------------------------------------------------------------------------------------------------------------------------------------------------------------------------------------------------------------------------------------------------------------------------------------------------------------------------------------------------------------------------------------------------------------------------------------------------------------------------------------------------------------------------------------------------------------------------------------|
|                              |                                                                                                                                                                                                                                                                                                | polysomnography / Insomnia Severity Index) and then tick the appropriate box (i.e., objective in the case of polysomnography and self-report in the case of the ISI).                                                                                                                                                                                                                                                                                                                                                                                                                                                                                 |
| 20. Measure of mental health | Record the name of the measure(s) used to assess mental health and/or wellbeing. Please also record if this measure was self-reported or rated by a clinician                                                                                                                                  | <p>A study that uses the Anxiety Disorder Interview Schedule (ADIS, a clinician rated measure of anxiety disorders) and the Generalised Anxiety Disorder Assessment-7(GAD-7, a self-report measure).</p> <p>List the name of the measure (e.g., ADIS/GAD-7) and then tick the appropriate box (i.e., clinician rated in the case of the ADIS and self-report in the case of the GAD-7).</p>                                                                                                                                                                                                                                                           |
| 21. Study quality            | <p>The Jadad scale assesses three key aspects of study quality that can affect the risk of bias; (i) randomization, (ii) blinding and (iii) withdrawal/drop-out.</p> <p>For guidance, please refer to the Jadad scale embedded within the data extraction form and the accompanying notes.</p> | <p>Full guidance and examples can be seen the accompanying Jaded scale document. However an example in relation to the assessment of randomization is given below;</p> <p>Give a max score of 2 for randomization and a minimum score of 0</p> <p>Award 1 point if randomization is mentioned (e.g. <i>“The patients were randomly assigned into two groups”</i>).</p> <p>Award 1 additional point if the method of randomization is appropriate (e.g. <i>“The randomization was accomplished using a computer, generated random number list, coin toss or well-shuffled envelopes”</i>).</p> <p>Deduct 1 point if the method of randomization is</p> |

Version 1: 14/03/2017

1  
2  
3  
4  
5  
6  
7  
8  
9  
10  
11  
12  
13  
14  
15  
16  
17  
18  
19  
20  
21  
22  
23  
24  
25  
26  
27  
28  
29  
30  
31  
32  
33  
34  
35  
36  
37  
38  
39  
40  
41  
42  
43  
44  
45  
46  
47  
48  
49

|                                           |                                                                                                                                                                   |                                                                                                                                                                                                                                                                                                                                                                                                                                                                                   |
|-------------------------------------------|-------------------------------------------------------------------------------------------------------------------------------------------------------------------|-----------------------------------------------------------------------------------------------------------------------------------------------------------------------------------------------------------------------------------------------------------------------------------------------------------------------------------------------------------------------------------------------------------------------------------------------------------------------------------|
|                                           |                                                                                                                                                                   | inappropriate (e.g. “ <i>The group assignment was accomplished by alternate assignment, by birthday, hospital number or day of the week etc.</i> ”)                                                                                                                                                                                                                                                                                                                               |
| 22. Theoretical basis of the intervention | Do the authors specify the theoretical basis of the intervention? If so, provide details.                                                                         | The intervention group received a 6 week course of self-guided CBT for insomnia. The intervention was delivered via the internet and included multiple components. Participants were required to complete a daily sleep diary as well as complete online exercises to realign maladaptive thought processes about sleep. There was also a psychoeducation module and a section detailing several relaxation exercises based around progressive muscle relaxation and mindfulness. |
| 23. Delivery modality                     | How was the intervention delivered to participants? Provide as much detail as possible in the text box provided.                                                  | A study that uses online self-help to provide an intervention to improve sleep.<br><br>The delivery modality is online/computerised self-help                                                                                                                                                                                                                                                                                                                                     |
| 24. Duration of the intervention          | How long did the intervention last (to the nearest week)? If this is not known or reported, please state unknown.                                                 | An intervention that comprises of 6 weekly modules would be 6 weeks long.                                                                                                                                                                                                                                                                                                                                                                                                         |
| 25. Adherence to the intervention         | There are often many measures of adherence to interventions. Please state the measure reported (where possible) in the text box along with the rate of adherence. | If an intervention comprised of 6 weekly modules and the average number of modules completed was 4, then, on average, 66% of the intervention was adhered to.                                                                                                                                                                                                                                                                                                                     |

# BMJ Open

## Does Improving Sleep Lead to Better Mental Health and Quality of Life? A Protocol for a Meta-Analytic Review of Randomised Controlled Trials

|                                 |                                                                                                                                                                                                             |
|---------------------------------|-------------------------------------------------------------------------------------------------------------------------------------------------------------------------------------------------------------|
| Journal:                        | <i>BMJ Open</i>                                                                                                                                                                                             |
| Manuscript ID                   | bmjopen-2017-016873.R1                                                                                                                                                                                      |
| Article Type:                   | Protocol                                                                                                                                                                                                    |
| Date Submitted by the Author:   | 19-May-2017                                                                                                                                                                                                 |
| Complete List of Authors:       | Scott, Alex; Sheffield University, School of Health and Related Research<br>Webb, Thomas; Sheffield University, Department of Psychology<br>Rowse, Georgina; Sheffield University, Clinical Psychology Unit |
| <b>Primary Subject Heading</b>: | Mental health                                                                                                                                                                                               |
| Secondary Subject Heading:      | Public health                                                                                                                                                                                               |
| Keywords:                       | Meta-analysis, Review, Protocol, Sleep, MENTAL HEALTH, Quality of life                                                                                                                                      |
|                                 |                                                                                                                                                                                                             |

SCHOLARONE™  
Manuscripts

1  
2  
3  
4  
5  
6  
7  
8  
9  
10  
11  
12  
13  
14  
15  
16  
17  
18  
19  
20  
21  
22  
23  
24  
25  
26  
27  
28  
29  
30  
31  
32  
33  
34  
35  
36  
37  
38  
39  
40  
41  
42  
43  
44  
45  
46  
47  
48  
49  
50  
51  
52  
53  
54  
55  
56  
57  
58  
59  
60

1 **Does Improving Sleep Lead to Better Mental Health and Quality of Life? A Protocol for**  
2 **a Meta-Analytic Review of Randomised Controlled Trials**

3 Alexander J. Scott, Thomas L. Webb, & Georgina Rowse  
4 The University of Sheffield, UK

5 For submission to: *BMJ Open*

6 Word count (excluding tables, figures and references): 4539

7  
8  
9  
10  
11  
12 Correspondence concerning this article should be addressed to Alexander Scott,  
13 School of Health and Related Research, The University of Sheffield, Regent Court, 30  
14 Regent Street, Sheffield, S1 4DA, alex.scott@sheffield.ac.uk

Does Improving Sleep Lead to Better Mental Health and Quality of Life?

2

1  
2  
3  
4  
5  
6  
7  
8  
9  
10  
11  
12  
13  
14  
15  
16  
17  
18  
19  
20  
21  
22  
23  
24  
25  
26  
27  
28  
29  
30  
31  
32  
33  
34  
35  
36  
37  
38  
39  
40  
41  
42  
43  
44  
45  
46  
47  
48  
49  
50  
51  
52  
53  
54  
55  
56  
57  
58  
59  
60

15

## Abstract

**Introduction:** Sleep and mental health go hand-in-hand, with many, if not all, mental health problems being associated with problems sleeping. Although sleep has been traditionally conceptualized as a secondary consequence of mental health problems, contemporary views prescribe a more influential, causal role of sleep in the formation and maintenance of mental health problems. One way to evaluate this assertion is to examine the extent to which interventions that successfully improve sleep also improve mental health and quality of life. **Method and analysis:** Randomized Controlled Trials (RCTs) describing the effects of interventions designed to improve sleep on mental health and/or quality of life will be retrieved via a systematic search of four bibliographic databases (in addition to a search for unpublished literature). Hedges  $g$  and associated 95% confidence intervals will be computed from means and standard deviations where possible. Following this, meta-analysis will be used to synthesize the effects reported in eligible trials and investigate the impact of variables that could potentially moderate the effect of changes in sleep on outcomes pertaining to mental health and quality of life. The Jadad scale for reporting randomized controlled trials will be used to assess study quality and publication bias will be assessed via visual inspection of a funnel plot and Egger's test alongside Orwin's fail-safe  $n$ . Finally, we will use mediation analysis to investigate whether changes in outcomes relating to mental health and quality of life can be attributed to changes in sleep quality. **Ethics and dissemination:** This study requires no ethical approval. We will submit the findings for publication in a peer-reviewed journal and promote the review to relevant stakeholders.

**Prospero registration:** CRD42017055450

**Keywords:** Meta-analysis; protocol; review; sleep; mental health; quality of life; intervention

1  
2  
3 39 **Strengths**  
4

- 5 40 • The proposed review should provide reliable evidence on the effect of interventions  
6  
7 41 designed to improve sleep on outcomes reflecting mental health and quality of life.  
8  
9 42 • The proposed review will further elucidate the nature of the relationship between  
10  
11 43 sleep and mental health.  
12  
13 44 • We will use the GRADE system to assess the strength of the evidence base. This will  
14  
15 45 allow members of the public, researchers, and clinicians to quickly access the  
16  
17 46 available evidence and judge its quality.  
18  
19

20  
21 47 **Limitations**  
22

- 23 48 • The proposed review will include a diverse range of interventions and target problems  
24  
25 49 that might lead to a heterogeneous group of studies. However, to mitigate this we will  
26  
27 50 use moderation analysis to investigate specific factors that might influence the effect  
28  
29 51 of sleep improvement on mental health and quality of life.  
30  
31  
32  
33  
34  
35  
36  
37  
38  
39  
40  
41  
42  
43  
44  
45  
46  
47  
48  
49  
50  
51  
52  
53  
54  
55  
56  
57  
58  
59  
60

Does Improving Sleep Lead to Better Mental Health and Quality of Life? 4

1  
2  
3 52 **Does Improving Sleep Lead to Better Mental Health and Quality of Life? A Protocol for**  
4  
5 53 **a Meta-Analytic Review of Randomized Controlled Trials**  
6

7 54 Difficulties sleeping and mental health problems are both public health concerns in  
8  
9 55 their own right; with each having a substantive impact on both individuals and society as a  
10  
11 56 whole<sup>1-4</sup>. However, sleep and mental health go hand-in-hand, with many, if not all, mental  
12  
13 57 health problems being associated with problems sleeping<sup>5-7</sup>. Traditionally, sleep problems  
14  
15 58 have been viewed as a consequence of mental health problems. Although the notion that  
16  
17 59 mental health problems can lead to difficulties sleeping still stands, evidence suggests that  
18  
19 60 problems sleeping can also contribute both to the formation of new mental health problems<sup>8-</sup>  
20  
21 61 <sup>10</sup> and to the maintenance of existing ones<sup>11-13</sup>. In other words, sleep is now thought to have a  
22  
23 62 bidirectional relationship to mental health, with problems sleeping likely to influence both the  
24  
25 63 onset and trajectory of a variety of mental health difficulties. Having said this, although a  
26  
27 64 number of empirical studies have manipulated sleep and examined the impact of so doing on  
28  
29 65 outcomes related to mental health, to date there has not been a systematic review of these  
30  
31 66 studies. Consequently, the magnitude of the effect of (changes in) sleep on mental health  
32  
33 67 problems is difficult to estimate and has not been compared between different mental health  
34  
35 68 outcomes and other factors that might influence the effect (e.g., across different groups of  
36  
37 69 participants, research designs, and approaches to intervention).  
38  
39  
40  
41  
42

43 70 The potential for a causal relationship between sleep and mental health also raises an  
44  
45 71 intriguing prospect; namely, that interventions designed to improve sleep could also improve  
46  
47 72 mental health. Providing a definitive answer to this question would have important  
48  
49 73 implications for clinicians, researchers, and members of the public alike. From a practical  
50  
51 74 perspective, if interventions designed to improve sleep can change mental health outcomes,  
52  
53 75 then they may be a useful tool for tackling mental health difficulties. Indeed, interventions  
54  
55 76 designed to improve sleep can often be delivered remotely, in self-help and group formats,  
56  
57  
58  
59  
60

Version 2: 16/05/2017



Does Improving Sleep Lead to Better Mental Health and Quality of Life?

5

1  
2  
3 77 and / or at little cost through the internet<sup>14-18</sup>. For example, a meta-analysis by Ho et al.  
4  
5 78 reported that self-help interventions based on the principles of CBT for insomnia (termed  
6  
7 79 CBTi) had medium-to-large effects on the symptoms of insomnia<sup>18</sup>.  
8

### 90 **Problems with extant literature and opportunities**

11  
12 81 The relationship between sleep and mental health is well documented, with numerous  
13  
14 82 reviews testifying to a robust link between the two<sup>6-8 19-24</sup>. However, the majority of these  
15  
16 83 reviews have tended to focus on primary studies with correlational research designs. That is,  
17  
18 84 they either; i) measure associations between variables at a single time point (i.e., cross-  
19  
20 85 sectional designs); or ii) measure associations between variables at multiple time points (i.e.,  
21  
22 86 longitudinal designs). For example, many reviews simply report the typical sleep profiles of  
23  
24 87 those with mental health difficulties relative to those without<sup>6 7 25 26</sup>. Cross-sectional designs  
25  
26 88 simply tell us that variables are associated in some way. It is impossible to determine whether  
27  
28 89 sleep causes mental health problems, mental health problems cause difficulties sleeping, or  
29  
30 90 whether the effect is bi-directional in nature.  
31  
32

33  
34 91 Longitudinal studies, although still correlational in nature, are better able to elucidate  
35  
36 92 causality than their cross-sectional counterparts. However, only a handful of reviews have  
37  
38 93 provided evidence on the relationship between sleep (at one point in time) and mental health  
39  
40 94 outcomes (measured later). Furthermore, all of these have focused on depression<sup>8 24 27 28</sup>. For  
41  
42 95 example, Baglioni et al.<sup>8</sup> conducted a meta-analytic evaluation of 21 studies investigating the  
43  
44 96 longitudinal associations between insomnia and depression. Baglioni et al. reported that non-  
45  
46 97 depressed people with insomnia had a twofold risk of developing depression compared to  
47  
48 98 people who did not experience difficulties sleeping at baseline. Longitudinal designs,  
49  
50 99 although better placed to infer causation, are still susceptible to the ‘third variable problem’  
51  
52 100<sup>29-31</sup>. Namely, that a third, unmeasured variable (e.g., having young children) could cause  
53  
54  
55  
56  
57  
58  
59  
60

Does Improving Sleep Lead to Better Mental Health and Quality of Life? 6

1  
2  
3 101 both sleep difficulties and mental health problems. In summary, correlational designs are not  
4  
5 102 a valid way of disentangling the relationship between problems sleeping and mental health.  
6

7  
8 103 Some reviews have assessed the impact of interventions designed to improve sleep on  
9  
10 104 mental health outcomes<sup>17 18 23 24 32-36</sup>. However, even these reviews do not permit us to draw  
11  
12 105 robust conclusions as to the causal impact of sleep quality on mental health outcomes for a  
13  
14 106 number of reasons. First, these reviews often include interventions that have not successfully  
15  
16 107 manipulated sleep (i.e., studies in which there was no significant impact of the intervention  
17  
18 108 on sleep outcomes). Such studies do not tell us anything about the relationship between sleep  
19  
20 109 and mental health other than that it can be difficult to improve sleep. Second, the focus of  
21  
22 110 extant reviews reporting both sleep and mental health variables has been on improving sleep,  
23  
24 111 with the measurement of mental health outcomes typically limited to depression and anxiety.  
25  
26 112 Consequently, the effect of improving sleep on other mental health problems and the  
27  
28 113 associated construct of quality of life<sup>37 38</sup> (QoL) more broadly is currently unclear.  
29

30  
31  
32 114 Finally, to our knowledge, to date there has been no attempt to investigate variables  
33  
34 115 that influence – or *moderate* – the impact of interventions that improve sleep on mental  
35  
36 116 health. Interventions designed to improve sleep are likely to vary in their content and  
37  
38 117 delivery, and such variables may influence how effective they are in improving sleep and / or  
39  
40 118 mental health outcomes. Furthermore, variables related to the nature of the sample (e.g., age,  
41  
42 119 severity of symptoms, nature of the mental health problem) and methodological features of  
43  
44 120 the primary study (e.g., self-report vs. objective assessment of the outcome variables) are  
45  
46 121 likely to influence the effect of the respective intervention. It is therefore crucial that the  
47  
48 122 impact of such variables is systematically examined across the extant evidence base in order  
49  
50 123 to draw reliable and valid conclusions about the impact of changes in sleep on outcomes  
51  
52 124 pertaining to mental health and quality of life.  
53

54  
55  
56 125 **The proposed review**  
57

58  
59  
60  
Version 2: 16/05/2017

1  
2  
3 126 A number of primary research studies have experimentally manipulated sleep  
4  
5 127 (typically via some sort of psychological intervention) and then measured mental health  
6  
7 128 outcomes. However, these individual studies have, to our knowledge, never been integrated  
8  
9 129 in a manner that allows the magnitude of the effect of sleep quality on mental health  
10  
11 130 outcomes to be estimated. Therefore, it is currently difficult to; i) draw firm conclusions  
12  
13 131 about the relationship between sleep and various mental health problems; and ii) recommend  
14  
15 132 with any confidence that mental health problems might be tackled using interventions that  
16  
17 133 have been designed to improve sleep. Furthermore, to date there has been no attempt to  
18  
19 134 understand the factors that influence, or moderate, the effect of improvements in sleep on  
20  
21 135 mental health. As a consequence, clinicians, researchers, and members of the public may be  
22  
23 136 unaware of whether and how the content and nature of the intervention(s), target sample and  
24  
25 137 mental health problem, and methodological features of the primary study can influence the  
26  
27 138 efficacy of an intervention.  
28  
29  
30

### 31 **Objectives**

32  
33  
34 140 The proposed review therefore has two broad objectives; i) to synthesize and quantify  
35  
36 141 the effect of interventions that improve sleep on outcomes reflecting mental health and QoL;  
37  
38 142 and ii) to explore variables that moderate the effect of interventions targeting sleep on  
39  
40 143 outcomes reflecting mental health and QoL.  
41  
42

### 43 **Method and Analysis**

44  
45 145 This protocol has been prepared in accordance with the Preferred Reporting Items for  
46  
47 146 Systematic Reviews and Meta-Analyses Protocol (PRISMA-P, see Supplementary Materials  
48  
49 147 1) checklist<sup>39</sup>.  
50  
51  
52  
53  
54  
55  
56  
57  
58  
59  
60

**148 Outcomes and Prioritization****149 *Measuring improvements in sleep***

150 The concept of ‘improved sleep’ is multifaceted and can mean different things to  
151 different people<sup>40-42</sup>. Indeed, many specific sleep problems are tied to mental health in unique  
152 ways and are often measured using specific outcome measures. For example, the experience  
153 of nightmares has been found to be associated with post-traumatic stress disorder (PTSD)<sup>43</sup>,  
154 as measured using specific outcome measures such as dream diaries<sup>44 45</sup> or the Clinician-  
155 Administered PTSD Scale (CAPS)<sup>46</sup> which includes a nightmare assessment. Consequently,  
156 one challenge for the proposed review is to ensure that all of the primary studies assess a  
157 similar notion of sleep improvement. To achieve this, the proposed review will require that  
158 the primary studies report a measure that reflects the overall quality of sleep experienced by  
159 participants. Broadly speaking, sleep quality consists of; (i) sleep continuity (e.g., sleep onset,  
160 sleep maintenance, and number of awakenings); and (ii) daytime impact (e.g., the extent to  
161 which the person feels refreshed on waking and throughout the day)<sup>41 42</sup>.

162 Sleep quality can be measured using both self-report and objective indices. For  
163 example, the Pittsburgh Sleep Quality Index<sup>47</sup> (PSQI) is widely recognized as the ‘gold  
164 standard’ self-report measure of sleep quality and consists of 19 items measuring 7  
165 components of sleep quality (subjective sleep quality, sleep latency, sleep duration, sleep  
166 efficiency, sleep disturbances, use of sleep medication, and daytime dysfunction). The ‘gold  
167 standard’ for objectively measuring sleep is accepted to be polysomnography (PSG)<sup>48</sup>; a  
168 technique that monitors multiple biophysiological parameters and can directly record  
169 components relating to sleep quality including sleep onset and sleep maintenance (for a  
170 review, see <sup>49</sup>). The proposed review will include both self-report and objective indices of  
171 sleep quality, but will also seek to compare effect sizes between different measures in an

172 effort to empirically examine the extent to which the nature of the measures influences the  
173 apparent effect of the interventions.

#### 174 *Measuring mental health and QoL*

175 The measurement of mental health is often variable, with a range of different  
176 outcomes which differ both in their administration and interpretation. Some studies will  
177 report a general measure assessing a specific diagnostic category (e.g., a measure of the  
178 severity of depression severity). For example, the Beck Depression Inventory II is a 21 item  
179 self-report measure designed to assess multiple facets of depression including mood,  
180 pessimism, self-dislike, loss of appetite, and social withdrawal, with higher scores indicating  
181 more severe depression<sup>50</sup>. Other studies might assess a single symptom or problem. For  
182 example, the Green Paranoid Thoughts Scale (GPTS) measures paranoid thoughts<sup>51</sup>, an  
183 experience that is associated with, but is not limited to, psychosis spectrum disorders<sup>52 53</sup>.  
184 Finally, some studies may report the effects of interventions designed to improve sleep on  
185 global measures of mental health. For example, the Clinical Global Impressions Severity  
186 scale (CGI-S)<sup>54</sup> asks clinicians to use their clinical experience to rate how mentally ill their  
187 client has been over the last week, on a scale ranging from 1 – *normal* to 7 – *amongst the*  
188 *most extremely ill patients*. Measures assessing aspects of mental health are either; (i) self-  
189 reported by the participant, or (ii) completed on behalf of the participant by a clinician or  
190 other independent rater. Both self-report and independently rated outcome measures will be  
191 included in the proposed review; however, as above, we will compare effect sizes between  
192 different measures in an effort to empirically examine the extent to which the nature of the  
193 measures influences the apparent effect of the interventions.

194 With regards to QoL, a construct closely linked with mental health<sup>37 38</sup>, Liu<sup>55</sup>  
195 commented that there are as many definitions of QoL as there are people, a statement which  
196 frames QoL as a personal and varied concept meaning different things from one person to

Does Improving Sleep Lead to Better Mental Health and Quality of Life? 10

1  
2  
3 197 another. Although there is much disagreement on operational definitions of QoL<sup>56 57</sup>,  
4  
5 198 fortunately there is also considerable overlap in the dimensions that researchers assess. For  
6  
7 199 example, five core dimensions of QoL that the majority of measures share are; (i) *physical*  
8  
9 200 *wellbeing* (e.g., health and fitness); (ii) *material wellbeing* (e.g., financial security,  
10  
11 201 possessions etc.); (iii) *social wellbeing* (e.g., breadth and depth of relationships); (iv)  
12  
13 202 *emotional wellbeing* (e.g., affect or mood, fulfilment, self-esteem etc.); and (v) *development*  
14  
15 203 *and activity level* (e.g., the possession and use of skills, work, education etc.)<sup>58</sup>. The proposed  
16  
17 204 review will therefore include measures of QoL that assess at least one of the five dimensions  
18  
19 205 detailed above listed by Felce and Perry<sup>58</sup>. For example, the Quality of Life Scale (QOLS)<sup>59</sup>  
20  
21 206 is a 16 item instrument that measures six domains of QoL; (i) material and physical  
22  
23 207 wellbeing; (ii) relationships with others; (iii) social, community and civic activities; (iv)  
24  
25 208 personal development and fulfilment; (v) recreation; and (vi) independence.  
26  
27  
28

### 209 **Eligibility Criteria**

#### 210 ***Inclusion criteria***

211 In order to be included in the proposed review, the primary studies need to:

- 212 1. Randomly allocate participants to either an experimental group that receive an  
213 intervention that is designed to improve sleep or a comparator group.
- 214 2. Report a statistically significant improvement at at least one follow-up point on a measure  
215 of sleep quality among participants in the experimental group as compared to those in the  
216 comparison group.
- 217 3. Include a measure of mental health and/or QoL subsequent to the measure of sleep  
218 quality.
- 219 4. Report sufficient data for us to be able to compute effect sizes reflecting the impact of the  
220 intervention on sleep quality and mental health and/or QoL. Where sufficient data is not

221 reported, we will contact the authors and request further data. However, if this is not  
222 provided then the study will not be included in the review.

223 5. Be written in English, or be able to be translated using available translation resources.

#### 224 ***Exclusion criteria***

225 The aim of the proposed review is to be as inclusive as possible and address potential  
226 differences between the primary studies (e.g., differences in the nature of the intervention or  
227 the mental health problem under consideration) using moderation analysis. Therefore, very  
228 few exclusion criteria will be applied. For example, we will not restrict the type of  
229 intervention (e.g., psychological and pharmacological), publication status, nature of the  
230 comparison condition, or sample (i.e., interventions directed toward adults, children, and  
231 adolescents will all be eligible). However, studies with the following characteristics will be  
232 excluded in order to ensure that we can reliably assess the independent contribution of  
233 changes in sleep on mental health outcomes:

- 234 1. Studies where the intervention contains elements that specifically target a mental health  
235 problem alongside improving sleep (e.g., an intervention that provides CBT for anxiety  
236 alongside efforts to improve sleep).
- 237 2. Studies adopting a pre-post (or within participant) design.

#### 238 **Information Sources**

239 The proposed review will use a combination of search techniques and sources in order  
240 to identify potential studies. First, we will search MEDLINE (1946 to present), Embase (1974  
241 to present), PsycINFO (1967 to present), and The Cochrane Library(1898 to present) using  
242 the Cochrane Highly Sensitive Search Strategy<sup>60</sup> to identify randomized controlled trials that  
243 include terms relating to sleep quality/disorders and mental health/QoL outcomes (see Table 1  
244 for a list of the proposed search terms). The search strategy has been developed in  
245 collaboration with a health sciences librarian specializing in systematic search procedures and



Does Improving Sleep Lead to Better Mental Health and Quality of Life? 12

1  
2  
3 246 will be used to search each database (see Supplementary Materials 2 for an example search  
4  
5 247 strategy). Second, the reference lists of extant reviews of the relationship between sleep and  
6  
7 248 mental health (e.g., those cited in the introduction) will be searched for any potential articles.  
8  
9  
10 249 Third, a search for any unpublished or ongoing studies will be conducted by searching online  
11  
12 250 databases including White Rose Online, The National Research Register, WHO approved  
13  
14 251 clinical trial databases (e.g. ISRCTN), and PROSPERO. Finally, the authors of articles  
15  
16 252 deemed eligible for inclusion will be contacted and asked if they are aware of any  
17  
18 253 unpublished research that may be eligible for inclusion in the review.  
19

### 20 21 254 **Data management**

22  
23 255 All records will be stored in the reference management software Endnote, and we will  
24  
25 256 follow PRISMA guidelines for the selection of studies for meta-analysis<sup>61</sup>. Specifically,  
26  
27 257 when the pool of potential studies has been identified, we will remove duplicates and initially  
28  
29 258 screen each record based on the title and abstract and exclude clearly ineligible studies.  
30  
31  
32 259 Following this initial screening, the full-text versions of each article will be reviewed in detail  
33  
34 260 and cross-referenced against the inclusion and exclusion criteria. The flow of articles through  
35  
36 261 the review, including the reasons for excluding studies will be documented in a PRISMA  
37  
38 262 flow chart.

### 39 40 41 263 **Data Extraction**

42  
43 264 Data will be recorded on standardized data extraction forms and a manual to  
44  
45 265 accompany the form will detail each variable to be extracted alongside definitions and  
46  
47 266 examples (see Supplementary Materials 3 and 4). Two reviewers will pilot the data extraction  
48  
49 267 forms and manual on three articles in order to ensure that there are no systematic problems or  
50  
51 268 difficulties coding any of the variables. After this, the data will be extracted from the full set  
52  
53 269 of studies by one reviewer. A second member of the review team will second code a subset of  
54  
55  
56 270 the included articles (at least 10%) and levels of agreement will be calculated (the subset of  
57  
58  
59



1  
2  
3 271 articles for second coding will be randomly selected using a computer generated algorithm).  
4  
5 272 Any disagreements will be resolved through discussion, with a third member of the review  
6  
7 273 team acting as arbiter for any outstanding disagreements. The review team will extract meta-  
8  
9  
10 274 data pertaining to source characteristics (e.g., publication status and year,), as well as data  
11  
12 275 relating to the characteristics of the sample (e.g., age, type of mental health problem), the  
13  
14 276 study (e.g., the nature of the comparison group, length of follow-up), and characteristics of  
15  
16 277 the intervention (e.g., theoretical basis, delivery modality) (see Table 2 for an overview of  
17  
18 278 potential moderators that we propose to code and examine).

### 20 21 279 **Proposed Analysis**

22  
23 280 Review Manager 5.3<sup>62</sup> will be used to compute Hedges  $g$  (and associated 95%  
24  
25 281 confidence intervals) using the means and standard deviations for each measure of sleep  
26  
27 282 quality, mental health, and QoL reported in studies comparing these outcomes between an  
28  
29 283 intervention group (i.e., a group receiving an intervention that improves sleep) and a  
30  
31 284 comparison group (e.g., wait-list, placebo, treatment as usual)<sup>1</sup>. Where means and standard  
32  
33 285 deviations are not available, we will compute effect sizes by converting relevant summary  
34  
35 286 statistics (e.g.,  $F$  values from an ANOVA testing the impact of an intervention on relevant  
36  
37 287 outcomes) using Lyons Morris' meta-analysis calculator<sup>63</sup>. The effect of the interventions on  
38  
39 288 sleep quality will be assessed using data from the first available follow-up point that reports a  
40  
41 289 statistically significant difference in sleep quality between the intervention and comparison  
42  
43 290 conditions. The effect of the intervention on outcomes pertaining to mental health and QoL  
44  
45 291 will be assessed at the longest follow-up point available, whether the effect at this point is  
46  
47 292 statistically significant or not (and we will investigate the effect of follow-up duration on  
48  
49  
50  
51  
52

---

53  
54  
55  
56  
57  
58  
59  
60  
<sup>1</sup> Data that has been adjusted for baseline differences between groups will be used to compute effect sizes, where available. However, if this information is not reported then we will use the unadjusted data to compute the effect size. We will also seek to compute effect sizes using the data from Intention to Treat (ITT) analyses where they are reported. Subscripts will be added to the table reporting the effect sizes derived from the primary research studies in order to identify how each effect size was computed and also to compare outcomes between studies that report adjusted vs. unadjusted statistics and ITT analyses vs. non-ITT analyses.

Does Improving Sleep Lead to Better Mental Health and Quality of Life? 14

1  
2  
3 293 outcomes using moderation analysis). . This strategy will provide a stringent test of the effect  
4  
5 294 of the interventions on outcomes pertaining to mental health and QoL (in the sense that any  
6  
7 295 changes need to have been maintained over time) and also enable us to investigate whether  
8  
9 296 the impact of the interventions on outcomes is mediated by changes in sleep quality that  
10  
11 297 precede the impact on outcomes pertaining to mental health and QoL (this proposed analysis  
12  
13 298 is discussed in detail below).

14  
15  
16 299 Where studies report multiple outcome measures under one diagnostic category (e.g.,  
17  
18 300 several measures of depression or sleep quality), the effect sizes will be computed for each  
19  
20 301 outcome and meta-analyzed in their own right to form one overall effect for inclusion in the  
21  
22 302 main analysis. For example, we would compute two effect sizes reflecting sleep quality for a  
23  
24 303 study that reports the effects of an intervention on the Pittsburgh Sleep Quality Index<sup>47</sup> and  
25  
26 304 the Insomnia Severity Index<sup>64</sup> (i.e., one effect size for each measure of sleep quality) and then  
27  
28 305 average them before inclusion in the main dataset. This procedure capitalizes on the  
29  
30 306 information that is available, while retaining the independence of effect sizes which is central  
31  
32 307 to the validity of meta-analysis<sup>65</sup>.

33  
34  
35  
36 308 The sample-weighted average effect size ( $g_+$ ) will be computed using a random effects  
37  
38 309 model as studies are likely to be “different from one another in ways too complex to capture  
39  
40 310 by a few simple study characteristics”<sup>66</sup>. Following Cohen’s<sup>67</sup> recommendations,  $g = 0.20$   
41  
42 311 will be taken to represent a ‘small’ effect size,  $g = 0.50$  a ‘medium’ effect size, and  $g = 0.80$  a  
43  
44 312 ‘large’ effect size. We will use these qualitative indices to interpret the findings. Publication  
45  
46 313 bias will be assessed via visual inspection of a funnel plot and Egger’s test<sup>68</sup>. Finally,  
47  
48 314 Orwin’s<sup>69</sup> formula will be used to determine the fail-safe  $n$  (i.e., the number of studies  
49  
50 315 producing a null effect that would be needed to reduce the overall effect of interventions that  
51  
52 316 improve sleep on outcomes relating to mental health and QoL to a trivial effect size).  
53  
54  
55  
56  
57  
58  
59  
60

### 317 **Heterogeneity, Bias and Study Quality**

318 The  $I^2$  statistic will be used to assess the heterogeneity of effect sizes across the  
319 primary studies<sup>70</sup>. The quality of each individual study included in the proposed review will  
320 be assessed using the Jadad scale for reporting randomized controlled trials<sup>71</sup>. The Jadad  
321 scale assesses three key areas of methodological quality that potentially impact the risk of  
322 bias – namely; randomization, blinding, and the flow of participants through the study. In  
323 order to assess these areas, raters will be asked to answer three questions: i) “*Was the study*  
324 *described as randomized (i.e., does it include words such as randomly, random, and*  
325 *randomization)?”*; ii) “*Was the study described as double blind?*”; and iii) “*Was there a*  
326 *description of withdrawals and dropouts?*”. Scores on the Jadad scale range from 0 to 5, with  
327 higher scores indicating a lower risk of bias (and therefore higher methodological quality).  
328 The Jadad scale for reporting randomized controlled trials has been extensively used as a  
329 measure of the methodological quality of RCTs (having received over 7,500 citations to date)  
330 and has been recommended as the most reliable and valid scale for assessing the quality of  
331 RCTs, in a review of 21 measures<sup>72</sup>. Finally, the Grading of Recommendations, Assessment,  
332 Development, and Evaluation (GRADE) system<sup>73 74</sup> will be used to assess the quality of the  
333 body of evidence as a whole and the extent to which it can and should be used to inform  
334 clinical recommendations.

### 335 **Moderation and Mediation Analysis**

336 Moderation analyses will be used to identify variables that influence the effect of  
337 interventions that improve sleep on both mental health and QoL. For continuous moderators  
338 (e.g., age, publication year, study quality), sample weighted meta-regression will be used to  
339 investigate the impact of the moderator on effect sizes. For example, the quality of a given  
340 study, assessed using the Jadad scale<sup>71</sup>, will be used as the independent variable in a sample-  
341 weighted meta-regression, with the effect sizes representing the effect of the interventions on

Does Improving Sleep Lead to Better Mental Health and Quality of Life? 16

1  
2  
3 342 outcomes pertaining to mental health or QoL used as the dependent variable. For categorical  
4  
5 343 variables (e.g., self-report vs. objective outcome measures, the nature of the comparison  
6  
7 344 condition), the sample-weighted average effect size  $g$  and associated standard errors will be  
8  
9  
10 345 computed for each level of the moderator and then the  $Q$  statistic will be used to assess if the  
11  
12 346 difference is statistically significant. For example, effect sizes based on clinician completed  
13  
14 347 measures of mental health (e.g., the Clinical Global Impressions Severity Scale<sup>54</sup>) will be  
15  
16 348 compared to effect sizes based on self-report measures of mental health (e.g., the Depression,  
17  
18 349 Anxiety, Stress Scale<sup>75</sup>).

20  
21 350 Mediation analysis will be used to investigate whether changes in mental health and  
22  
23 351 QoL can be attributed to changes in sleep. In line with Kenny, Kashy, and Bolger's<sup>76</sup>  
24  
25 352 recommendations, we will conduct 4 multiple regressions in order to investigate mediation.  
26  
27 353 These regressions will test; i) the effect of the independent variable (i.e., the intervention) on  
28  
29 354 the dependent variable (i.e., outcomes reflecting mental health and QoL); ii) the effect of the  
30  
31 355 independent variable on putative mediator (i.e., outcomes reflecting sleep quality); iii) the  
32  
33 356 effect of the mediating variable on the dependent variable; and finally iv) the simultaneous  
34  
35 357 effect of the independent variable and the mediator on the dependent variable, respectively. If  
36  
37 358 the effect of the interventions on mental health and QoL can be attributed to changes in the  
38  
39 359 quality of sleep, then the impact of the interventions on outcomes pertaining to mental health  
40  
41 360 and QoL should be significantly reduced when the effect of the interventions on sleep quality  
42  
43 361 is statistically controlled.

#### 47 362 **Ethics and Dissemination**

49 363 As the proposed research is a meta-analytic review of primary studies, no ethical  
50  
51 364 approval is required. We have registered the proposed review on the PROSPERO database  
52  
53 365 (CRD42017055450) in order to adhere to the principles of open research. Following  
54  
55  
56  
57  
58  
59  
60

1  
2  
3 366 completion of the review, we aim to publish the findings in a peer reviewed academic journal  
4  
5 367 and attend conferences and dissemination events with stakeholders where possible.  
6

7 368 **Discussion**  
8

9  
10 369 The proposed review will use meta-analysis alongside moderator and mediation  
11  
12 370 analyses to i) quantify the effect of interventions that improve sleep on mental health  
13  
14 371 outcomes; ii) test whether any effect of the interventions on these outcomes is mediated by  
15  
16 372 changes in sleep quality, and iii) explore variables that potentially moderate the effect of the  
17  
18 373 interventions targeting sleep on mental health outcomes. The proposed review has a number  
19  
20 374 of strengths that we believe mean that it will make a substantive contribution. For example,  
21  
22 375 the proposed review will be inclusive and investigate the effect of improving sleep on a wide  
23  
24 376 range of mental health problems, as well as QoL. Furthermore, the proposed review will  
25  
26 377 further elucidate our understanding of the causal relationship between sleep and mental health  
27  
28 378 by including only studies that successfully manipulate sleep and by conducting a mediation  
29  
30 379 analysis to investigate whether any changes in mental health and QoL can be attributed to  
31  
32 380 changes in sleep. We will also use the GRADE system to assess the strength of the evidence  
33  
34 381 base<sup>73 74</sup> which should allow members of the public, researchers, and clinicians to quickly  
35  
36 382 access the available evidence and judge its quality. Despite the strengths of the proposed  
37  
38 383 review, the wide range of interventions, populations and target problems that are likely to be  
39  
40 384 addressed by the primary research studies may lead to a relatively heterogeneous group of  
41  
42 385 studies (and thus, potentially effect sizes) which may lead to concerns that we are not  
43  
44 386 comparing 'like with like' (cf. the problem of mixing apples and oranges<sup>77</sup>) and limit the  
45  
46 387 extent to which the findings can be generalized to a specific population (i.e., solely to those  
47  
48 388 with depression). However, we will use moderation analysis to investigate specific factors  
49  
50 389 that might influence the effect of improvements in sleep on mental health and QoL. Our hope  
51  
52 390 is that these analyses prove informative, both in understanding mental health problems and  
53  
54  
55  
56  
57  
58  
59  
60

Does Improving Sleep Lead to Better Mental Health and Quality of Life? 18

1  
2  
3 391 QoL (i.e., when can changes in sleep quality be expected to influence these outcomes?).and  
4  
5 392 in developing interventions designed to mitigate these problems (e.g., the review will be able  
6  
7 393 to identify which interventions are most effective, and for whom)  
8

9  
10 394 **Author Contributions**

11 395 The first author (AJS) had the idea for the proposed review and approached TLW and  
12  
13 396 GR, who contributed to the design of the research. AJS drafted the protocol and TLW and GR  
14  
15 397 provided detailed comments before submission. AJS is the identified guarantor of the review.  
16  
17

18 398 **Funding Statement**

19  
20 399 This research has not yet received any funding from the public, commercial or not-  
21  
22 400 for-profit sectors.  
23

24 401 **Competing Interests**

25  
26 402 We have no competing interests to declare.  
27  
28  
29  
30  
31  
32  
33  
34  
35  
36  
37  
38  
39  
40  
41  
42  
43  
44  
45  
46  
47  
48  
49  
50  
51  
52  
53  
54  
55  
56  
57  
58  
59  
60

## References

1. Colten HR, Altevogt BM. Sleep disorders and sleep deprivation: An unmet public health problem: National Academies Press 2006.
2. Patel V, Flisher AJ, Hetrick S, et al. Mental health of young people: A global public-health challenge. *The Lancet* 2007;369(9569):1302-13.
3. Robotham D. Sleep as a public health concern: Insomnia and mental health. *Journal of Public Mental Health* 2011;10(4):234-37.
4. Prince M, Patel V, Saxena S, et al. No health without mental health. *The Lancet* 2007;370(9590):859-77.
5. Ford DE, Kamerow DB. Epidemiologic study of sleep disturbances and psychiatric disorders: An opportunity for prevention? *JAMA* 1989;262(11):1479-84.
6. Baglioni C, Nanovska S, Regen W, et al. Sleep and mental disorders: A meta-analysis of polysomnographic research. *Psychological Bulletin* 2016;14:14.
7. Benca RM, Obermeyer WH, Thisted RA, et al. Sleep and psychiatric disorders - a meta-analysis. *Archives of General Psychiatry* 1992;49(8):651-68.
8. Baglioni C, Battagliese G, Feige B, et al. Insomnia as a predictor of depression: A meta-analytic evaluation of longitudinal epidemiological studies. *Journal of Affective Disorders* 2011;135(1):10-19.
9. Gregory AM, Rijdsdijk FV, Lau J, et al. The direction of longitudinal associations between sleep problems and depression symptoms: A study of twins aged 8 and 10 years. *Sleep* 2009;32(2):189-99.
10. Breslau N, Roth T, Rosenthal L, et al. Sleep disturbance and psychiatric disorders: A longitudinal epidemiological study of young adults. *Biological Psychiatry* 1996;39(6):411-18.



Does Improving Sleep Lead to Better Mental Health and Quality of Life? 20

- 1  
2  
3 427 11. Harvey AG. Insomnia: Symptom or diagnosis? *Clinical Psychology Review*  
4  
5 428 2001;21(7):1037-59.  
6  
7 429 12. Soehner AM, Kaplan KA, Harvey AG. Insomnia comorbid to severe psychiatric illness.  
8  
9 430 *Sleep Medicine Clinics* 2013;8(3):361-71.  
10  
11 431 13. Freeman D, Stahl D, McManus S, et al. Insomnia, worry, anxiety and depression as  
12  
13 432 predictors of the occurrence and persistence of paranoid thinking. *Social Psychiatry*  
14  
15 433 *and Psychiatric Epidemiology* 2012;47(8):1195-203.  
16  
17 434 14. Cuijpers P, Van Straten A, Andersson G. Internet-administered cognitive behavior therapy  
18  
19 435 for health problems: A systematic review. *Journal of Behavioral Medicine*  
20  
21 436 2008;31(2):169-77.  
22  
23 437 15. Wu JQ, Appleman ER, Salazar RD, et al. Cognitive behavioral therapy for insomnia  
24  
25 438 comorbid with psychiatric and medical conditions: A meta-analysis. *JAMA Internal*  
26  
27 439 *Medicine* 2015;175(9):1461-72. doi: 10.1001/jamainternmed.2015.3006  
28  
29 440 16. van Straten A, Cuijpers P. Self-help therapy for insomnia: A meta-analysis. *Sleep*  
30  
31 441 *Medicine Reviews* 2009;13(1):61-71. doi: 10.1016/j.smr.2008.04.006  
32  
33 442 17. Koffel EA, Koffel JB, Gehrman PR. A meta-analysis of group cognitive behavioral  
34  
35 443 therapy for insomnia. *Sleep Medicine Reviews* 2015;19:6-16. doi:  
36  
37 444 10.1016/j.smr.2014.05.001  
38  
39 445 18. Ho FY, Chung KF, Yeung WF, et al. Self-help cognitive-behavioral therapy for insomnia:  
40  
41 446 A meta-analysis of randomized controlled trials. *Sleep Medicine Reviews* 2015;19:17-  
42  
43 447 28.  
44  
45 448 19. Chan MS, Chung KF, Yung KP, et al. Sleep in schizophrenia: A systematic review and  
46  
47 449 meta-analysis of polysomnographic findings in case-control studies. *Sleep Medicine*  
48  
49 450 *Reviews* 2016;10:10.



- 1  
2  
3 451 20. Kobayashi I, Boarts JM, Delahanty DL. Polysomnographically measured sleep  
4  
5 452 abnormalities in ptsd: A meta-analytic review. *Psychophysiology* 2007;44(4):660-9.  
6  
7 453 21. Nota JA, Sharkey KM, Coles ME. Sleep, arousal, and circadian rhythms in adults with  
8  
9 454 obsessive-compulsive disorder: A meta-analysis. *Neuroscience & Biobehavioral*  
10  
11 455 *Reviews* 2015;51:100-7.  
12  
13 456 22. Reeve S, Sheaves B, Freeman D. The role of sleep dysfunction in the occurrence of  
14  
15 457 delusions and hallucinations: A systematic review. *Clinical Psychology Review*  
16  
17 458 2015;42:96-115.  
18  
19 459 23. Belleville G, Cousineau H, Levrier K, et al. Meta-analytic review of the impact of  
20  
21 460 cognitive-behavior therapy for insomnia on concomitant anxiety. *Clinical Psychology*  
22  
23 461 *Review* 2011;31(4):638-52. doi: 10.1016/j.cpr.2011.02.004  
24  
25 462 24. Lovato N, Gradisar M. A meta-analysis and model of the relationship between sleep and  
26  
27 463 depression in adolescents: Recommendations for future research and clinical practice.  
28  
29 464 *Sleep Medicine Reviews* 2014;18(6):521-9.  
30  
31 465 25. Chouinard S, Poulin J, Stip E, et al. Sleep in schizophrenia: A meta-analysis.  
32  
33 466 *Schizophrenia Research* 2001;49(1-2):200-00.  
34  
35 467 26. Diaz-Roman A, Perestelo-Perez L, Buela-Casal G. Sleep in obsessive-compulsive  
36  
37 468 disorder: A systematic review and meta-analysis. *Sleep Medicine* 2015;16(9):1049-55.  
38  
39 469 doi: 10.1016/j.sleep.2015.03.020  
40  
41 470 27. Cole MG, Dendukuri N. Risk factors for depression among elderly community subjects:  
42  
43 471 A systematic review and meta-analysis. *American Journal of Psychiatry*  
44  
45 472 2003;160(6):1147-56. doi: 10.1176/appi.ajp.160.6.1147  
46  
47 473 28. Zhai L, Zhang H, Zhang D. Sleep durations and depression among adults: A meta-  
48  
49 474 analysis of prospective studies. *Depression and Anxiety* 2015;32(9):664-70. doi:  
50  
51 475 10.1002/da.22386  
52  
53  
54  
55  
56  
57  
58  
59  
60

Does Improving Sleep Lead to Better Mental Health and Quality of Life? 22

- 1  
2  
3 476 29. Mauro R. Understanding love (left out variables error): A method for estimating the  
4  
5 477 effects of omitted variables. *Psychological Bulletin* 1990;108(2):314.  
6  
7 478 30. Zapf D, Dormann C, Frese M. Longitudinal studies in organizational stress research: A  
8  
9 479 review of the literature with reference to methodological issues. *Journal of*  
10  
11 480 *Occupational Health Psychology* 1996;1(2):145.  
12  
13 481 31. Duckworth AL, Tsukayama E, May H. Establishing causality using longitudinal  
14  
15 482 hierarchical linear modeling: An illustration predicting achievement from self-control.  
16  
17 483 *Social Psychological and Personality Science* 2010  
18  
19 484 32. Tang NKY, Lereya ST, Boulton H, et al. Nonpharmacological treatments of insomnia for  
20  
21 485 long-term painful conditions: A systematic review and meta-analysis of patient-  
22  
23 486 reported outcomes in randomized controlled trials. *Sleep* 2015;38(11):1751-+. doi:  
24  
25 487 10.5665/sleep.5158  
26  
27 488 33. Okajima I, Komada Y, Inoue Y. A meta-analysis on the treatment effectiveness of  
28  
29 489 cognitive behavioral therapy for primary insomnia. *Sleep and Biological Rhythms*  
30  
31 490 2011;9(1):24-34. doi: 10.1111/j.1479-8425.2010.00481.x  
32  
33 491 34. Hansen K, Hoefling V, Kroener-Borowik T, et al. Efficacy of psychological interventions  
34  
35 492 aiming to reduce chronic nightmares: A meta-analysis. *Clinical Psychology Review*  
36  
37 493 2013;33(1):146-55. doi: 10.1016/j.cpr.2012.10.012  
38  
39 494 35. Gupta MA, Simpson FC, Lyons DCA. The effect of treating obstructive sleep apnea with  
40  
41 495 positive airway pressure on depression and other subjective symptoms: A systematic  
42  
43 496 review and meta-analysis. *Sleep Medicine Reviews* 2016;28:55-68. doi:  
44  
45 497 10.1016/j.smr.2015.07.002  
46  
47 498 36. Ho FY-Y, Chan CS, Tang KN-S. Cognitive-behavioral therapy for sleep disturbances in  
48  
49 499 treating posttraumatic stress disorder symptoms: A meta-analysis of randomized  
50  
51  
52  
53  
54  
55  
56  
57  
58  
59  
60

- 1  
2  
3 500 controlled trials. *Clinical Psychology Review* 2016;43:90-102. doi:  
4  
5 501 10.1016/j.cpr.2015.09.005  
6  
7 502 37. Katschnig H. Quality of life in mental disorders: Challenges for research and clinical  
8  
9 503 practice. *World Psychiatry* 2006;5(3):139-45.  
10  
11 504 38. Saarni SI, Suvisaari J, Sintonen H, et al. Impact of psychiatric disorders on health-related  
12  
13 505 quality of life: General population survey. *The British Journal of Psychiatry*  
14  
15 506 2007;190(4):326-32.  
16  
17 507 39. Shamseer L, Moher D, Clarke M, et al. Preferred reporting items for systematic review  
18  
19 508 and meta-analysis protocols (prisma-p) 2015: Elaboration and explanation. *BMJ*  
20  
21 509 2015;349:g7647.  
22  
23 510 40. Akerstedt T, Hume K, Minors D, et al. The meaning of good sleep: A longitudinal study  
24  
25 511 of polysomnography and subjective sleep quality. *Journal of Sleep Research*  
26  
27 512 1994;3(3):152-58.  
28  
29 513 41. Harvey AG, Stinson K, Whitaker KL, et al. The subjective meaning of sleep quality: A  
30  
31 514 comparison of individuals with and without insomnia. *Sleep* 2008;31(3):383.  
32  
33 515 42. Libman E, Fichten C, Creti L, et al. Refreshing sleep and sleep continuity determine  
34  
35 516 perceived sleep quality. *Sleep Disorders* 2016;2016  
36  
37 517 43. Lamarche LJ, De Koninck J. Sleep disturbance in adults with posttraumatic stress  
38  
39 518 disorder: A review. *The Journal of Clinical Psychiatry* 2007  
40  
41 519 44. Mellman TA, David D, Bustamante V, et al. Dreams in the acute aftermath of trauma and  
42  
43 520 their relationship to ptsd. *Journal of Traumatic Stress* 2001;14(1):241-47.  
44  
45 521 45. Levin R, Fireman G. Nightmare prevalence, nightmare distress, and self-reported  
46  
47 522 psychological disturbance. *Sleep* 2002;25(2):205-12.  
48  
49 523 46. Blake DD, Weathers FW, Nagy LM, et al. The development of a clinician-administered  
50  
51 524 ptsd scale. *Journal of Traumatic Stress* 1995;8(1):75-90.  
52  
53  
54  
55  
56  
57  
58  
59  
60

Does Improving Sleep Lead to Better Mental Health and Quality of Life? 24

- 1  
2  
3 525 47. Buysse DJ, Reynolds CF, Monk TH, et al. The pittsburgh sleep quality index: A new  
4  
5 526 instrument for psychiatric practice and research. *Psychiatry Research* 1989;28(2):193-  
6  
7 527 213.  
8  
9  
10 528 48. van de Water A, Holmes A, Hurley DA. Objective measurements of sleep for non-  
11  
12 529 laboratory settings as alternatives to polysomnography – a systematic review. *Journal*  
13  
14 530 *of Sleep Research* 2011;20(1pt2):183-200.  
15  
16 531 49. Vaughn BV, Giallanza P. Technical review of polysomnography. *CHEST Journal*  
17  
18 532 2008;134(6):1310-19.  
19  
20  
21 533 50. Beck AT, Steer RA, Carbin MG. Psychometric properties of the beck depression  
22  
23 534 inventory: Twenty-five years of evaluation. *Clinical Psychology Review* 1988;8(1):77-  
24  
25 535 100.  
26  
27 536 51. Green C, Freeman D, Kuipers E, et al. Measuring ideas of persecution and social  
28  
29 537 reference: The green et al. Paranoid thought scales (gpts). *Psychological Medicine*  
30  
31 538 2008;38(01):101-11.  
32  
33  
34 539 52. Johns LC, Cannon M, Singleton N, et al. Prevalence and correlates of self-reported  
35  
36 540 psychotic symptoms in the british population. *The British Journal of Psychiatry*  
37  
38 541 2004;185(4):298-305.  
39  
40  
41 542 53. McGrath JA, Nestadt G, Liang K-Y, et al. Five latent factors underlying schizophrenia:  
42  
43 543 Analysis and relationship to illnesses in relatives. *Schizophrenia Bulletin*  
44  
45 544 2004;30(4):855.  
46  
47 545 54. Busner J, Targum SD. The clinical global impressions scale: Applying a research tool in  
48  
49 546 clinical practice. *Psychiatry* 2007;4(7):28-37.  
50  
51 547 55. Liu B-C. Quality of life indicators in us metropolitan areas: Praeger 1976.  
52  
53  
54  
55  
56  
57  
58  
59  
60

- 1  
2  
3 548 56. Aaronson N, Alonso J, Burnam A, et al. Assessing health status and quality-of-life  
4  
5 549 instruments: Attributes and review criteria. *Quality of Life Research* 2002;11(3):193-  
6  
7 550 205.  
8  
9  
10 551 57. Gill TM, Feinstein AR. A critical appraisal of the quality of quality-of-life measurements.  
11  
12 552 *JAMA* 1994;272(8):619-26.  
13  
14 553 58. Felce D, Perry J. Quality of life: Its definition and measurement. *Research in*  
15  
16 554 *Developmental Disabilities* 1995;16(1):51-74.  
17  
18 555 59. Burckhardt CS, Anderson KL. The quality of life scale (qols): Reliability, validity, and  
19  
20 556 utilization. *Health and Quality of Life Outcomes* 2003;1(1):60.  
21  
22  
23 557 60. Robinson KA, Dickersin K. Development of a highly sensitive search strategy for the  
24  
25 558 retrieval of reports of controlled trials using pubmed. *International Journal of*  
26  
27 559 *Epidemiology* 2002;31(1):150-53.  
28  
29  
30 560 61. Moher D, Liberati A, Tetzlaff J, et al. Preferred reporting items for systematic reviews and  
31  
32 561 meta-analyses: The prisma statement. *Journal of Clinical Epidemiology*  
33  
34 562 2009;62(10):1006-12. doi: 10.1016/j.jclinepi.2009.06.005  
35  
36 563 62. Collaboration C. Review manager (revman)[computer program] version 5.2. 3.  
37  
38 564 Copenhagen: The nordic cochrane centre; 2012, 2014.  
39  
40  
41 565 63. Lyons LC, Morris WA. Lyons-morris meta-analysis calculator 2017 [Available from:  
42  
43 566 <http://www.lyonsmorris.com/ma1/> accessed 15th May 2017.  
44  
45 567 64. Bastien CH, Vallières A, Morin CM. Validation of the insomnia severity index as an  
46  
47 568 outcome measure for insomnia research. *Sleep Medicine* 2001;2(4):297-307.  
48  
49  
50 569 65. Scammacca N, Roberts G, Stuebing KK. Meta-analysis with complex research designs  
51  
52 570 dealing with dependence from multiple measures and multiple group comparisons.  
53  
54 571 *Review of Educational Research* 2014;84(3):328-64.  
55  
56  
57  
58  
59  
60

Does Improving Sleep Lead to Better Mental Health and Quality of Life? 26

- 1  
2  
3 572 66. Cooper HM. Integrating research: A guide for literature reviews. London, England: Sage  
4  
5 573 1986.  
6  
7 574 67. Cohen J. A power primer. *Psychological Bulletin* 1992;112(1):155.  
8  
9 575 68. Egger M, Smith GD, Schneider M, et al. Bias in meta-analysis detected by a simple,  
10  
11 576 graphical test. *BMJ* 1997;315(7109):629-34.  
12  
13 577 69. Orwin RG. A fail-safe n for effect size in meta-analysis. *Journal of Educational Statistics*  
14  
15 578 1983:157-59.  
16  
17 579 70. Higgins JP, Thompson SG, Deeks JJ, et al. Measuring inconsistency in meta-analyses.  
18  
19 580 *BMJ* 2003;327(7414):557-60.  
20  
21 581 71. Jadad AR, Moore RA, Carroll D, et al. Assessing the quality of reports of randomized  
22  
23 582 clinical trials: Is blinding necessary? *Controlled Clinical Trials* 1996;17(1):1-12.  
24  
25 583 72. Olivo SA, Macedo LG, Gadotti IC, et al. Scales to assess the quality of randomized  
26  
27 584 controlled trials: A systematic review. *Physical Therapy* 2007  
28  
29 585 73. Guyatt G, Oxman AD, Akl EA, et al. Grade guidelines: 1. Introduction: Grade evidence  
30  
31 586 profiles and summary of findings tables. *Journal of Clinical Epidemiology*  
32  
33 587 2011;64(4):383-94. doi: 10.1016/j.jclinepi.2010.04.026  
34  
35 588 74. Guyatt GH, Oxman AD, Vist GE, et al. Grade: An emerging consensus on rating quality  
36  
37 589 of evidence and strength of recommendations. *BMJ* 2008;336(7650):924.  
38  
39 590 75. Lovibond PF, Lovibond SH. The structure of negative emotional states: Comparison of  
40  
41 591 the depression anxiety stress scales (dass) with the beck depression and anxiety  
42  
43 592 inventories. *Behaviour Research and Therapy* 1995;33(3):335-43.  
44  
45 593 76. Kenny DA, Kashy DA, Bolger N. Data analysis in social psychology. New York: Oxford  
46  
47 594 University Press 1998.  
48  
49 595 77. Barone JE. Comparing apples and oranges: A randomised prospective study. *BMJ*  
50  
51 596 2000;321(7276):1569-70.  
52  
53  
54  
55  
56  
57  
58  
59  
60

Version 2: 16/05/2017

For peer review only - <http://bmjopen.bmj.com/site/about/guidelines.xhtml>

597 **Table 1**598 *Search Terms that will be used to Identify Randomized Controlled Trials of Interventions*599 *Designed to Improve Sleep on Outcomes Pertaining to Mental Health and Quality of Life*600 *(QoL)*601 **HSSS for RCTs<sup>a</sup>** **Sleep** **Mental health and QoL**

|     | <b>HSSS for RCTs<sup>a</sup></b> | <b>Sleep</b>             | <b>Mental health and QoL</b>     |
|-----|----------------------------------|--------------------------|----------------------------------|
| 602 | Randomized controlled trial      | Sleep*                   | “Psychological health”           |
| 603 | Controlled clinical trial        | “Circadian rhythm*”      | “Mental”                         |
| 604 | Randomized                       | Insomnia                 | Wellbeing                        |
| 605 | Placebo                          | Hypersomnia              | Distress                         |
| 606 | Drug therapy                     | Parasomnia               | “Quality of life”                |
| 607 | Randomly                         | Narcolepsy               | QoL                              |
| 608 | Trial                            | Apnea                    | Psychiat*                        |
| 609 | Groups                           | Apnoea                   | Affect                           |
| 610 |                                  | Nightmare*               | Depress*                         |
| 611 |                                  | “Restless legs syndrome” | Mood                             |
| 612 |                                  |                          | Stress                           |
| 613 |                                  |                          | Anxi*                            |
| 614 |                                  |                          | Phobi*                           |
| 615 |                                  |                          | “Obsessive compulsive disorder”  |
| 616 |                                  |                          | PTSD                             |
| 617 |                                  |                          | “Post-traumatic stress disorder” |
| 618 |                                  |                          | Trauma                           |
| 619 |                                  |                          | OCD                              |
| 620 |                                  |                          | Psychos*s                        |
| 621 |                                  |                          | Psychotic                        |
| 622 |                                  |                          | Schiz*                           |
| 623 |                                  |                          | Bipolar                          |
| 624 |                                  |                          | Hallucination*                   |
| 625 |                                  |                          | Delusion*                        |
| 626 |                                  |                          | “Eating dis*”                    |
| 627 |                                  |                          | Anorexia                         |
| 628 |                                  |                          | Bulimia                          |
| 629 |                                  |                          | “Binge eating”                   |
| 630 |                                  |                          | “Attention deficit”              |
| 631 |                                  |                          | “Hyperactivity disorder”         |
| 632 |                                  |                          | ADHD                             |
| 633 |                                  |                          |                                  |
| 634 |                                  |                          |                                  |

## Does Improving Sleep Lead to Better Mental Health and Quality of Life?

28

635 Autis\*

636 Asperger\*

---

637 *Notes:* Studies will need to include at least one search term from each of the filter above in

638 the title, abstract, or keywords, for consideration for inclusion in the review.

639 \* = Indicates that variants of the word after the asterisk will be searched for (e.g., depress\*

640 will search for depressive etc.),

641 <sup>a</sup> The Highly Sensitive Search Strategy (HSSS) is more than just a key word search, rather it

642 encompasses search techniques and strategies<sup>60</sup>.



Does Improving Sleep Lead to Better Mental Health and Quality of Life?

29

643 **Table 2**644 *Variables to be Extracted for Moderation Analysis (where available)*

| 645 | <b>Source characteristics</b> | <b>Sample characteristics</b>    | <b>Study characteristics</b>  | <b>Intervention characteristics</b> |
|-----|-------------------------------|----------------------------------|-------------------------------|-------------------------------------|
| 646 | Publication status            | Age                              | Nature of comparison group(s) | Theoretical basis                   |
| 647 | Publication year              | Gender                           | Attrition/drop-out rate       | Delivery modality                   |
| 648 | Journal impact factor         | Type of mental health problem(s) | Methodological quality        | Duration                            |
| 649 |                               | Type of sleep problem(s)         | Timing of follow-up           | Self-help vs. face-to-face          |
| 650 |                               | Clinical status                  | Method of recruitment         | Adherence                           |
| 651 |                               | Comorbidity                      | Measure(s) of sleep           |                                     |
| 652 |                               | Measure of mental health         | Measure(s) of mental health   |                                     |
| 653 |                               | Concurrent medication use        | Study quality                 |                                     |
| 654 |                               | Concurrent psychological help    | Type of analysis              |                                     |
| 655 |                               |                                  | Adjusted vs. unadjusted data  |                                     |
| 656 |                               |                                  |                               |                                     |
| 657 |                               |                                  |                               |                                     |

**Summary of the Main Revisions**

| Requesting reviewer | Revision description                                                                                                                                                                                                                                                                  | Location in protocol          |
|---------------------|---------------------------------------------------------------------------------------------------------------------------------------------------------------------------------------------------------------------------------------------------------------------------------------|-------------------------------|
| Editor              | The abstract has been updated in line with the Editors request for more detail.                                                                                                                                                                                                       | p. 2                          |
| Editor & Reviewer 2 | Dates of coverage added to each database searched                                                                                                                                                                                                                                     | p. 11, line 240 - 241         |
| Reviewer 1          | Mediation analysis added in line with Reviewer 1s feedback                                                                                                                                                                                                                            | p. 16, line 350               |
| Reviewer 1          | More detail added to explain our proposed moderation analysis including examples                                                                                                                                                                                                      | p. 15, line 335               |
| Reviewer 1 & 2      | New section, 'Outcomes and Prioritization', added to the method and analysis section. Here we detail how we will assess sleep improvement, mental health and quality of life.                                                                                                         | p. 8, line 148                |
| Reviewer 1          | More detail added to explain our procedure for computing effect sizes from multiple outcome measures assessing the same, or similar, constructs                                                                                                                                       | p. 14, line 299               |
| Reviewer 1          | More detail added to inclusion criteria 2 to indicate requirements for an intervention to demonstrate a <i>significant</i> impact (i.e. statistical significance at at least 1 follow-up point)                                                                                       | p. 10, line 214               |
| Reviewer 1          | Procedure for handing adjusted data, and data from ITT analyses added                                                                                                                                                                                                                 | p. 13 and p. 29, line 654/655 |
| Reviewer 1 & 2      | Detail added to state how we will convert effect sizes where needed (including from dichotomous outcomes)                                                                                                                                                                             | p. 13, line 284               |
| Reviewer 1          | Rephrased a sentence which could be read as suggesting the traditional view that mental health problems cause sleep disturbance has been replaced by a view that the causal relationship is in the other direction to be more accurate (i.e. that the relationship is bidirectional). | p. 4, line 61                 |
| Reviewer 1          | Discussion added reflecting on review strengths and weaknesses                                                                                                                                                                                                                        | p. 17, line 368               |
| Reviewer 1          | Reference list amended in line with <i>BMJ Open</i> policies                                                                                                                                                                                                                          | p. 19                         |
| Reviewer 2          | Inclusion criteria revised to be explicit that children and adolescents are eligible for inclusion                                                                                                                                                                                    | p. 11, line 230               |
| Reviewer 2          | Search terms relating to ADHD and autism have been added                                                                                                                                                                                                                              | Table 1, p. 27                |
| Reviewer 2          | Inclusion criteria revised to state that we will include studies not written in English providing we can translate them using available translation resources                                                                                                                         | p. 11, line 223               |
| Reviewer 2          | Detail added to state that 2 <sup>nd</sup> coding will involve a random subset of studies                                                                                                                                                                                             | p. 13, line 271               |

## Supplementary Materials 2

### *Ovid Medline Example Search Strategy*

---

Database: Ovid MEDLINE(R) Epub Ahead of Print, In-Process & Other Non-Indexed Citations, Ovid MEDLINE(R) Daily, Ovid MEDLINE and Versions(R)

Search Strategy:

-----

- 1 (Sleep\$ or Insomnia\$ or nightmare\$ or hypersomnia\$ or parasomnia\$ or narcolepsy or circadian rhythm\$ or restless leg syndrome or apnea or apnoea).ti,ab. (180111)
- 2 Sleep/ or Sleep Disorders, Circadian Rhythm/ or Sleep Disorders, Intrinsic/ or Narcolepsy/ or Restless Legs Syndrome/ or Sleep Apnea Syndromes/ or "Sleep Initiation and Maintenance Disorders"/ or Parasomnias/ (70224)
- 3 1 or 2 (193630)
- 4 (psychological health or distress pr "quality of life" or QoL or mental or psychiat\$ or affect or depress\$ or mood or stress or anxious or anxiety or phobi\$ or obsessive compulsive disorder\$ or OCD or psychos#s or psychotic or schiz\$ or bipolar or bi-polar or hallucination\$ or delusion\$ or eating disorder\$ or eating disturbance\$ or anorexia or bulimia or binge eating or wellbeing or well-being or QoL or quality of life).ti,ab. (2200869)
- 5 Stress, Psychological/ or Anxiety Disorders/ or Obsessive-Compulsive Disorder/ or Phobic Disorders/ or exp "Feeding and Eating Disorders"/ or Anorexia Nervosa/ or Binge-Eating Disorder/ or Bulimia Nervosa/ or Depressive Disorder/ or Hallucinations/ or Delusions/ or Anxiety/ or Depression/ or psychotic disorders/ (379929)
- 6 4 or 5 (2283788)
- 7 3 and 6 (57412)
- 8 randomized controlled trial.pt. (446587)
- 9 controlled clinical trial.pt. (91788)
- 10 randomized.ab. (389502)
- 11 placebo.ab. (183719)
- 12 drug therapy.fs. (1928261)
- 13 randomly.ab. (270741)

- 1  
2  
3  
4 14 trial.ab. (409336)  
5 15 groups.ab. (1670961)  
6  
7 16 or/8-15 (3972831)  
8  
9 17 exp animals/ not humans.sh. (4311313)  
10 18 16 not 17 (3433652)  
11 19 7 and 18 (19379)  
12  
13 20 (trial\$ or intervention\$ or treatment\$.ti,ab. (4565976)  
14  
15 21 7 and 20 (23924)  
16  
17 22 21 not 19 (11896)  
18

19 \*\*\*\*\*  
20  
21  
22  
23  
24  
25  
26  
27  
28  
29  
30  
31  
32  
33  
34  
35  
36  
37  
38  
39  
40  
41  
42  
43  
44  
45  
46  
47  
48  
49  
50  
51  
52  
53  
54  
55  
56  
57  
58  
59  
60

Data extraction form

Study ID:

|  |  |  |
|--|--|--|
|  |  |  |
|--|--|--|

Please consult the '**data extraction coding manual**' for instructions on how to code each.

### Article meta-data

1. Please state the surnames and first initials of *all* authors of the article (e.g., Smith, J. A., Jones, A. C.);

2. Please state the year that the article was first published:

|  |  |  |  |
|--|--|--|--|
|  |  |  |  |
|--|--|--|--|

3. What is the publication status of the article?       Published (move to Q3.1)  
 Unpublished (move to Q4)

- 3.1. Please state the name of the journal that the article was published in:

### Nature of the focal sample

4. State the mean age of the intervention group(s) to the nearest year at baseline:

5. State the percentage of the intervention group(s) that are female at baseline

6. Indicate the clinical status of the **mental health problems** of participants **included** in the study:

Clinical       Non-clinical       Mixed       Not known

## Data extraction form

Study ID:

|  |  |  |
|--|--|--|
|  |  |  |
|--|--|--|

1  
2  
3  
4  
5  
6  
7  
8  
9  
10  
11  
12  
13  
14  
15  
16  
17  
18  
19  
20  
21  
22  
23  
24  
25  
26  
27  
28  
29  
30  
31  
32  
33  
34  
35  
36  
37  
38  
39  
40  
41  
42  
43  
44  
45  
46  
47  
48  
49  
50  
51  
52  
53  
54  
55  
56  
57  
58  
59  
60

7. Indicate the clinical status of the **sleep related problems** of participants **included** in the study:

Clinical     Non-clinical     Mixed     Not known

8. What **mental-health difficulties**, symptoms or problems experienced by the participants were recorded by the study authors? Please provide details:

|  |
|--|
|  |
|--|

9. What the **sleep related difficulties**, symptoms or problems experienced by the participants were recorded by the study authors? Please provide details:

|  |
|--|
|  |
|--|

10. Did the focal sample have comorbid conditions in addition to sleep and/or mental health difficulties? An example would be alcohol dependency among those with anxiety and depression. Please record this where applicable:

|  |
|--|
|  |
|--|

11. Were the participants taking medication for a **mental health difficulty** in addition to the intervention being tested? If yes provide details; if no, please state NA.

|  |
|--|
|  |
|--|

Study ID:

|  |  |  |
|--|--|--|
|  |  |  |
|--|--|--|

## Data extraction form

1  
2  
3  
4  
5  
6  
7  
8  
9  
10  
11  
12  
13  
14  
15  
16  
17  
18  
19  
20  
21  
22  
23  
24  
25  
26  
27  
28  
29  
30  
31  
32

12. Were the participants taking medication for a **sleep difficulty** in addition to the intervention being tested? If yes provide details; if no, please state NA.

|  |
|--|
|  |
|--|

13. Were the participants receiving psychological help for a **mental health difficulty** in addition to the intervention being tested? If yes provide details in the box below, if no please state NA;

|  |
|--|
|  |
|--|

14. Were the participants receiving psychological help for a **sleep difficulty** in addition to the intervention being tested? If yes, provide details; if no, please state NA:

|  |
|--|
|  |
|--|

33  
34  
35  
36  
37  
38  
39  
40  
41  
42  
43  
44  
45  
46  
47  
48  
49  
50  
51  
52  
53  
54  
55  
56  
57  
58  
59  
60

### Research design

15. How were the participants recruited to the study?

|  |
|--|
|  |
|--|

16. Please state the nature of the comparison group(s) (i.e., the group(s) that the intervention group is compared to);

|  |
|--|
|  |
|--|

Data extraction form

Study ID:

|  |  |  |
|--|--|--|
|  |  |  |
|--|--|--|

17. State the number of participants in the intervention group(s) who have dropped out of the trial between baseline and each follow-up point recorded. Please express this as a percentage of the number of participants at baseline. If no data is reported, then please state 'not reported'.

18. Record all points where data collection has occurred after the intervention has ended in months (e.g., post-intervention, 3 months, 12 months);

19. Please record the outcome measure(s) **used to measure sleep quality** and indicate whether the measures are self-reported, clinician rated, or objective;

|  |                                      |                                    |                                    |
|--|--------------------------------------|------------------------------------|------------------------------------|
|  | <input type="checkbox"/> Self-report | <input type="checkbox"/> Clinician | <input type="checkbox"/> Objective |
|  | <input type="checkbox"/> Self-report | <input type="checkbox"/> Clinician | <input type="checkbox"/> Objective |
|  | <input type="checkbox"/> Self-report | <input type="checkbox"/> Clinician | <input type="checkbox"/> Objective |
|  | <input type="checkbox"/> Self-report | <input type="checkbox"/> Clinician | <input type="checkbox"/> Objective |

20. Please record the outcome measure(s) **used to record outcomes pertaining to mental health and / or wellbeing** and indicate whether the measures are self-reported or rated by a clinician rated.

|  |                                      |                                    |
|--|--------------------------------------|------------------------------------|
|  | <input type="checkbox"/> Self-report | <input type="checkbox"/> Clinician |
|  | <input type="checkbox"/> Self-report | <input type="checkbox"/> Clinician |
|  | <input type="checkbox"/> Self-report | <input type="checkbox"/> Clinician |
|  | <input type="checkbox"/> Self-report | <input type="checkbox"/> Clinician |



Study ID:

|  |  |  |
|--|--|--|
|  |  |  |
|--|--|--|

## Data extraction form

21. Please use the Jadad quality scale to score the study in terms of randomization, blinding and the account of participants. Use the 'Score given' column, placing your score in the box provided. Examples and guidance on the interpretation of each item are provided in the coding manual;

| Item                    | Min-max score | Description                                                                                                                                                                            | Score given          |
|-------------------------|---------------|----------------------------------------------------------------------------------------------------------------------------------------------------------------------------------------|----------------------|
| Randomization           | 0 to 2        | 1 point if randomization is mentioned at all<br><br>1 additional point if the method of randomization is appropriate<br><br>Deduct 1 point if method of randomization is inappropriate | <input type="text"/> |
| Blinding                | 0 to 2        | 1 point if blinding is mentioned<br><br>1 additional point if the method of blinding is appropriate<br><br>Deduct 1 point if the method of blinding is inappropriate                   | <input type="text"/> |
| Account of Participants | 0 to 1        | The fate of all participants in the trial is known. If there are no data the reason is stated                                                                                          | <input type="text"/> |

### Features of the intervention

22. Please state the theoretical approach of the intervention for each group receiving an intervention designed to improve sleep (e.g., psychological, pharmacological, medical device etc.). Use the text box below to provide as much detail as possible.

## Data extraction form

Study ID:

|  |  |  |
|--|--|--|
|  |  |  |
|--|--|--|

23. How was the intervention delivered to participants in each group receiving an intervention designed to improve sleep? Use the box below to provide details.

|  |
|--|
|  |
|--|

24. Please state the duration of the intervention(s) to the nearest week;

|  |
|--|
|  |
|--|

25. Please record levels of adherence to the intervention(s) where possible (e.g., the number of pages of the intervention materials read, the amount of time spent looking at the intervention). If no data on adherence is available, then please state "not reported";

|  |
|--|
|  |
|--|

**END OF FORM**

Supplementary Materials 4

Data Extraction Manual

Data extraction manual

The following documents contains details regarding the data to be extracted from primary studies included in the present review. Characteristics of the source (green), sample (yellow), study (blue), and intervention (grey) are outlined here.

| Variable              | Definition for coding                                                                                                                                                                                                                                                                                                                                                                                                                                                                                                               | Example                                                                                           |
|-----------------------|-------------------------------------------------------------------------------------------------------------------------------------------------------------------------------------------------------------------------------------------------------------------------------------------------------------------------------------------------------------------------------------------------------------------------------------------------------------------------------------------------------------------------------------|---------------------------------------------------------------------------------------------------|
| 1. Article authors    | State the surnames and first initials of all authors of the article                                                                                                                                                                                                                                                                                                                                                                                                                                                                 | Smith, J. A., Jones, A. C.                                                                        |
| 2. Publication year   | The year that the article was first published                                                                                                                                                                                                                                                                                                                                                                                                                                                                                       | For articles published in Jan 2017, the year '2017' will be recorded on the data extraction form. |
| 3. Publication status | Refers to whether an article has been published in a peer reviewed academic journal or not.<br><br>Articles reporting a study published in a peer reviewed academic journal should be coded as 'Published'.<br><br>Articles reporting a study that has not been published in a peer reviewed academic journal should be coded as 'unpublished'.<br><br>Unpublished studies include those taken from PhD theses, dissertations, or studies that have otherwise not been accepted following peer review, or submitted to peer review. |                                                                                                   |

|                                                                     |                                                                                                                                                                                                                                                                                                                                                                                                                                                                                                                                                                                           |                                                                                                                                                   |
|---------------------------------------------------------------------|-------------------------------------------------------------------------------------------------------------------------------------------------------------------------------------------------------------------------------------------------------------------------------------------------------------------------------------------------------------------------------------------------------------------------------------------------------------------------------------------------------------------------------------------------------------------------------------------|---------------------------------------------------------------------------------------------------------------------------------------------------|
| 3.1. Journal name if published                                      | State the name of the journal that the article was published in                                                                                                                                                                                                                                                                                                                                                                                                                                                                                                                           | e.g. <i>British Journal of Psychiatry</i> or <i>Psychiatry Research</i> etc.                                                                      |
| 4. Age                                                              | <p>The mean age of participants in the experimental group(s).</p> <p>Record the mean age of the participants in all of the groups who received an intervention designed to improve sleep. This may be more than one group, so, in these cases record the age of participants separately for each group.</p> <p>If mean age is not reported for the experimental group(s) alone, then report the total sample mean age. If no age data is available, state 'not reported'</p>                                                                                                              |                                                                                                                                                   |
| 5. Gender                                                           | <p>The percentage of participants in the experimental group(s) who are female.</p> <p>Record the percentage of participants who are female in all of the groups receiving an intervention designed to improve sleep. This may be more than one group, in which case record the percentage of female participants separately for each group.</p> <p>If the gender of the participants is not reported for the experimental group(s) alone, then report the percentage of participants who are female in the total sample. If no data on gender is available, then state 'not reported'</p> |                                                                                                                                                   |
| 6. Clinical status of participants' (with respect to mental health) | The mental health status of the sample should be classified as either; i) clinical; ii) non-clinical or iii) mixed                                                                                                                                                                                                                                                                                                                                                                                                                                                                        | A study investigating the impact of an intervention aimed at improving sleep on paranoid thinking might recruit participants with a DSM diagnosed |

1  
2  
3  
4  
5  
6  
7  
8  
9  
10  
11  
12  
13  
14  
15  
16  
17  
18  
19  
20  
21  
22  
23  
24  
25  
26  
27  
28  
29  
30  
31  
32  
33  
34  
35  
36  
37  
38  
39  
40  
41  
42  
43  
44  
45  
46  
47

|                                                                          |                                                                                                                                                                                                                                                                                                                                                                                                                                                                                                                                                                                                                                                                                                                                                                                                                                                                                                                                               |                                                                                                                                                                                                                                                                                                                                                                                                                                                                                                                                                                                                                                                                                                                                                                                                                                                                                |
|--------------------------------------------------------------------------|-----------------------------------------------------------------------------------------------------------------------------------------------------------------------------------------------------------------------------------------------------------------------------------------------------------------------------------------------------------------------------------------------------------------------------------------------------------------------------------------------------------------------------------------------------------------------------------------------------------------------------------------------------------------------------------------------------------------------------------------------------------------------------------------------------------------------------------------------------------------------------------------------------------------------------------------------|--------------------------------------------------------------------------------------------------------------------------------------------------------------------------------------------------------------------------------------------------------------------------------------------------------------------------------------------------------------------------------------------------------------------------------------------------------------------------------------------------------------------------------------------------------------------------------------------------------------------------------------------------------------------------------------------------------------------------------------------------------------------------------------------------------------------------------------------------------------------------------|
|                                                                          | <p><b>Clinical samples</b> are those that comprise primarily of participants that have a clinical diagnosis of a mental health problem as defined by formal criteria (e.g ICD, DSM). Studies where it is explicitly stated that participants have a formal diagnoses of a mental health problem are classed as clinical. This is often defined by formal diagnostic and research criteria such as the DSM or ICD</p> <p><b>Non-clinical samples</b> are those that comprise primarily of participants that have no formal diagnosis of a mental health problem. Mental health is often studied in non-clinical samples who do not have a formal diagnosis. These participants should be classed as non-clinical.</p> <p><b>Mixed samples</b> are those that include participants who have formal clinical diagnoses and those who do not. Samples that include both clinical and non-clinical participants should be classified as mixed.</p> | <p>psychosis spectrum disorder only. As a DSM rated diagnosis is a requirement for entry into the trial, this would be coded as a <b>clinical sample</b>.</p> <p>A similar study investigating the impact of an intervention aimed at improving sleep on paranoid thinking might include participants from the general population without any formal diagnoses of a mental health problem. For example, participants might be volunteers who have responded to a media advertisement of email invitation. This would be coded as a <b>non-clinical sample</b>.</p> <p>A third study investigating the impact of an intervention aimed at improving sleep on paranoid thinking might include a mix participants with a DSM rated diagnosis (clinical) and those from the general population with no diagnosis (non-clinical). This would be coded as a <b>mixed sample</b>.</p> |
| <p>7. Clinical status of participants with respect to sleep problems</p> | <p>The clinical status of the sleep difficulties reported by the sample are coded as either; i) clinical; ii) non-clinical or iii) mixed</p> <p><b>Clinical samples</b> are those that comprise primarily of participants that have a clinical diagnosis of a sleep problem as defined by formal criteria (e.g., ICD, DSM). Studies where it is explicitly stated that participants have a formal diagnoses of a sleep problem are classed as clinical. This is often defined by formal diagnostic and research criteria such as the DSM or ICD</p>                                                                                                                                                                                                                                                                                                                                                                                           | <p>A study investigating the impact of an intervention aimed at improving sleep on depressive symptoms might recruit participants with a DSM diagnosed sleep problem (e.g. insomnia). As a DSM rated diagnosis of insomnia is a requirement for entry into the trial, this would be coded as a <b>clinical sample</b>.</p> <p>A similar study investigating the impact of an intervention aimed at improving sleep on depressive symptoms might include participants from the general population without any formal diagnoses of a sleep problem. For example, participants might be volunteers who have responded to a media</p>                                                                                                                                                                                                                                              |

|                             |                                                                                                                                                                                                                                                                                                                                                                                                                                                                                                               |                                                                                                                                                                                                                                                                                                                                                                                                                                                    |
|-----------------------------|---------------------------------------------------------------------------------------------------------------------------------------------------------------------------------------------------------------------------------------------------------------------------------------------------------------------------------------------------------------------------------------------------------------------------------------------------------------------------------------------------------------|----------------------------------------------------------------------------------------------------------------------------------------------------------------------------------------------------------------------------------------------------------------------------------------------------------------------------------------------------------------------------------------------------------------------------------------------------|
|                             | <p><b>Non-clinical samples</b> are those that comprise primarily of participants that have no formal diagnosis of a sleep problem. Sleep is often studied in non-clinical samples who do not have a formal diagnosis. These participants should be classed as non-clinical.</p> <p><b>Mixed participants</b> are those that include participants who have formal clinical diagnoses and those who do not. Samples that include both clinical and non-clinical participants should be classified as mixed.</p> | <p>advertisement of email invitation. This would be coded as a <b>non-clinical sample</b>.</p> <p>A third study investigating the impact of an intervention aimed at improving sleep on depressive symptoms might include a mix participants with a DSM rated diagnosis of a sleep problem (clinical) and those from the general population with no diagnosis of a sleep problem (non-clinical). This would be coded as a <b>mixed sample</b>.</p> |
| 8. Type of mental problems  | Record the type of mental health problems and experiences that the authors measure. Where there are multiple mental health difficulties/problems, record all that are mentioned in the text.                                                                                                                                                                                                                                                                                                                  | A study may use the GAD-7 and the BDI to measure anxiety and depression respectively at baseline and again at post-intervention. In this case, record ‘anxiety’ and ‘depression’ in the box provided.                                                                                                                                                                                                                                              |
| 9. Type of sleep problem(s) | Record the type of sleep problem(s) and experiences that the authors measure. Where there are multiple sleep difficulties/problems, record all that are mentioned in the text.                                                                                                                                                                                                                                                                                                                                | A study may use the insomnia severity scale and the PSQI to measure insomnia and sleep quality respectively at baseline and again at post-intervention. In this case, record ‘insomnia’ and ‘sleep quality’ in the box provided.                                                                                                                                                                                                                   |
| 10. Comorbidity             | Record any problems or difficulties identified by the authors that are comorbid to the targeted sleep and/or the mental health problem.                                                                                                                                                                                                                                                                                                                                                                       | An example would be an intervention designed to improve sleep in those with depression and alcohol dependency. For this review, sleep and depression would not be considered comorbid at these are the target problems of this review. However, alcohol dependency would be the comorbid problem to record in the box provided.                                                                                                                    |

|                                                                                                                                                                                                                                         |                                                                                                                                                                          |                                                                                                                                                                                                                                                                                                                                                                                                                                                                                                                                                                                                                                                                                       |
|-----------------------------------------------------------------------------------------------------------------------------------------------------------------------------------------------------------------------------------------|--------------------------------------------------------------------------------------------------------------------------------------------------------------------------|---------------------------------------------------------------------------------------------------------------------------------------------------------------------------------------------------------------------------------------------------------------------------------------------------------------------------------------------------------------------------------------------------------------------------------------------------------------------------------------------------------------------------------------------------------------------------------------------------------------------------------------------------------------------------------------|
| <p>1<br/>2<br/>3<br/>4<br/>5<br/>6<br/>7<br/>8<br/>9<br/>10<br/>11<br/>12<br/>13<br/>14<br/>15<br/>16<br/>17<br/>18<br/>19<br/>20<br/>21</p> <p>11. Concurrent medication use for mental health</p>                                     | <p>Were participants allowed to take medication for a mental health difficulty that is different to the intervention being tested while taking part in the research?</p> | <p>A study may investigate the effect of improving sleep using CBTi in people with depression who are also using SSRI medication. As these participants are receiving medication for depression, in addition to receiving an intervention designed to improve sleep, they would be classed as using concurrent medication for a mental health problem.</p> <p>Alternatively, some studies may screen those using medication for a mental health problem and remove these participants before randomisation, leaving only those with depression who are not on medication for it. In which case, state that the participants are using no concurrent medication for mental health.</p> |
| <p>22<br/>23<br/>24<br/>25<br/>26<br/>27<br/>28<br/>29<br/>30<br/>31<br/>32<br/>33<br/>34<br/>35<br/>36<br/>37<br/>38<br/>39<br/>40<br/>41<br/>42<br/>43<br/>44<br/>45<br/>46<br/>47</p> <p>12. Concurrent medication use for sleep</p> | <p>Were participants allowed to take medication for a sleep difficulty that is different to the intervention being tested while taking part in the research?</p>         | <p>A study that tests the impact of a CBTi intervention for insomnia that allows participants to continue with benzodiazepine use would be classed as allowing concurrent medication for a sleep problems.</p> <p>Alternatively, a study might screen those taking medication for a sleep problem and remove these participants before randomization. Therefore, this study does not allow participants to take medication for a sleep problem in addition to the intervention being tested. In which case, state that the participants are using no concurrent medication for sleep.</p>                                                                                             |

|                                                                                                                                                                                  |                                                                                                                                                                                                                                                                                                                                                                           |                                                                                                                                                                                                                                                                                                                                                                                                                                                                                                              |
|----------------------------------------------------------------------------------------------------------------------------------------------------------------------------------|---------------------------------------------------------------------------------------------------------------------------------------------------------------------------------------------------------------------------------------------------------------------------------------------------------------------------------------------------------------------------|--------------------------------------------------------------------------------------------------------------------------------------------------------------------------------------------------------------------------------------------------------------------------------------------------------------------------------------------------------------------------------------------------------------------------------------------------------------------------------------------------------------|
| <p>1<br/>2<br/>3<br/>4<br/>5<br/>6<br/>7<br/>8<br/>9<br/>10<br/>11<br/>12<br/>13<br/>14<br/>15<br/>16<br/>17</p> <p>13. Concurrent psychological treatment for mental health</p> | <p>Were participants receiving psychological help for a mental health difficulty that is different to the intervention being tested while taking part in the research?</p>                                                                                                                                                                                                | <p>A study where participants are able to continue receiving psychological help from outside of the study team for an anxiety problem while receiving the study intervention.</p> <p>Alternatively, some studies may screen participants who are currently receiving psychological help for a mental health problem and remove these participants before randomisation. In which case, In which case, state that the participants are receiving no concurrent psychological treatment for mental health.</p> |
| <p>18<br/>19<br/>20<br/>21<br/>22<br/>23<br/>24<br/>25<br/>26<br/>27<br/>28<br/>29<br/>30<br/>31</p> <p>14. Concurrent psychological treatment for sleep</p>                     | <p>Were participants receiving psychological help for a sleep difficulty that is different to the intervention being tested while taking part in the research?</p>                                                                                                                                                                                                        | <p>A study where participants are able to continue receiving psychological help from outside of the study team for a sleep problem while receiving the study intervention.</p> <p>Alternatively, some studies may screen participants who are currently receiving psychological help for a sleep problem and remove these participants before randomization. In which case, In which case, state that the participants are receiving no concurrent psychological treatment for sleep.</p>                    |
| <p>32<br/>33<br/>34<br/>35<br/>36<br/>37<br/>38<br/>39<br/>40<br/>41<br/>42<br/>43<br/>44<br/>45<br/>46<br/>47</p> <p>15. Method of recruitment</p>                              | <p>Record how participants were recruited and from which source(s). This could include, for example, referral by GPs into the trial or from health professionals, recruitment from volunteer email lists at University's or self-referral from the participant. A study may also use a combination of multiple recruitment methods. If so, record all where possible.</p> | <p>Clinicians may refer participants with psychosis spectrum diagnoses from outpatient centres into the trial. In which case, record that participants were recruited by healthcare professionals from a clinical outpatient setting.</p> <p>Alternatively, participants may see advertisements and contact the study team directly. In which case,</p>                                                                                                                                                      |



|                                |                                                                                                                                                                                         |                                                                                                                                                                                                                                                                                                                                                                                                                                                        |
|--------------------------------|-----------------------------------------------------------------------------------------------------------------------------------------------------------------------------------------|--------------------------------------------------------------------------------------------------------------------------------------------------------------------------------------------------------------------------------------------------------------------------------------------------------------------------------------------------------------------------------------------------------------------------------------------------------|
|                                |                                                                                                                                                                                         | record that participants were recruited via media advertisement and self-referred to the study.                                                                                                                                                                                                                                                                                                                                                        |
| 16. Nature of comparison group | Describe the type of comparison group and provide a brief description.                                                                                                                  | <p>Participants in a wait-list control group would receive no intervention for the duration of the study. In which case, record 'wait-list control group'</p> <p>Alternatively, an intervention might be compared to treatment as usual (TAU) where participants receive the same care they would usually receive regardless of the trial. In which case, record 'treatment as usual' alongside a brief description of what treatment as usual is.</p> |
| 17. Attrition/dropout          | The total number of participants in the intervention group(s) who have dropped out of the trial between baseline and each follow-up point recorded should be expressed as a percentage. | <p>If a study started with a total <math>n = 100</math> participants in the intervention group giving baseline data, and ended with <math>n = 75</math> at post-intervention and <math>n = 50</math> at a six month follow-up, then this would be reported as;</p> <p>Post-intervention = 25% attrition</p> <p>6 month follow-up = 50% attrition</p>                                                                                                   |
| 18. Follow-up points           | Any point in the study where data has been collected following the intervention                                                                                                         | <p>A study that collects data immediately after an intervention has been delivered and then again 3 and 12 months later would have the following follow-up points;</p> <ol style="list-style-type: none"> <li>1. Post-intervention</li> <li>2. 3 months</li> <li>3. 12 months</li> </ol>                                                                                                                                                               |

|                                     |                                                                                                                                                                                                                                                                                                |                                                                                                                                                                                                                                                                                                                                                                                                                                                                        |
|-------------------------------------|------------------------------------------------------------------------------------------------------------------------------------------------------------------------------------------------------------------------------------------------------------------------------------------------|------------------------------------------------------------------------------------------------------------------------------------------------------------------------------------------------------------------------------------------------------------------------------------------------------------------------------------------------------------------------------------------------------------------------------------------------------------------------|
| <p>19. Measure of sleep</p>         | <p>Record the name of the measure(s) used to assess sleep. Please also record whether this measure was; i) self-reported; ii) rated by a clinician; or iii) measured objectively.</p>                                                                                                          | <p>A study that uses both polysomnography (an objective measure of sleep) and the Insomnia Severity Index (ISI, a self-report measure).</p> <p>List the name of the measure (e.g. polysomnography / Insomnia Severity Index) and then tick the appropriate box (i.e., objective in the case of polysomnography and self-report in the case of the ISI).</p>                                                                                                            |
| <p>20. Measure of mental health</p> | <p>Record the name of the measure(s) used to assess mental health and/or wellbeing. Please also record if this measure was self-reported or rated by a clinician</p>                                                                                                                           | <p>A study that uses the Anxiety Disorder Interview Schedule (ADIS, a clinician rated measure of anxiety disorders) and the Generalised Anxiety Disorder Assessment-7(GAD-7, a self-report measure).</p> <p>List the name of the measure (e.g., ADIS/GAD-7) and then tick the appropriate box (i.e., clinician rated in the case of the ADIS and self-report in the case of the GAD-7).</p>                                                                            |
| <p>21. Study quality</p>            | <p>The Jadad scale assesses three key aspects of study quality that can affect the risk of bias; (i) randomization, (ii) blinding and (iii) withdrawal/drop-out.</p> <p>For guidance, please refer to the Jadad scale embedded within the data extraction form and the accompanying notes.</p> | <p>Full guidance and examples can be seen the accompanying Jaded scale document. However an example in relation to the assessment of randomization is given below;</p> <p>Give a max score of 2 for randomization and a minimum score of 0</p> <p>Award 1 point if randomization is mentioned (e.g. <i>“The patients were randomly assigned into two groups”</i>).</p> <p>Award 1 additional point if the method of randomization is appropriate (e.g. <i>“The</i></p> |

|                                           |                                                                                                                                                                   |                                                                                                                                                                                                                                                                                                                                                                                                                                                                                   |
|-------------------------------------------|-------------------------------------------------------------------------------------------------------------------------------------------------------------------|-----------------------------------------------------------------------------------------------------------------------------------------------------------------------------------------------------------------------------------------------------------------------------------------------------------------------------------------------------------------------------------------------------------------------------------------------------------------------------------|
|                                           |                                                                                                                                                                   | <p><i>randomization was accomplished using a computer, generated random number list, coin toss or well-shuffled envelopes”).</i></p> <p>Deduct 1 point if the method of randomization is inappropriate (e.g. “<i>The group assignment was accomplished by alternate assignment, by birthday, hospital number or day of the week etc.</i>”)</p>                                                                                                                                    |
| 22. Theoretical basis of the intervention | Do the authors specify the theoretical basis of the intervention? If so, provide details.                                                                         | The intervention group received a 6 week course of self-guided CBT for insomnia. The intervention was delivered via the internet and included multiple components. Participants were required to complete a daily sleep diary as well as complete online exercises to realign maladaptive thought processes about sleep. There was also a psychoeducation module and a section detailing several relaxation exercises based around progressive muscle relaxation and mindfulness. |
| 23. Delivery modality                     | How was the intervention delivered to participants? Provide as much detail as possible in the text box provided.                                                  | <p>A study that uses online self-help to provide an intervention to improve sleep.</p> <p>The delivery modality is online/computerised self-help</p>                                                                                                                                                                                                                                                                                                                              |
| 24. Duration of the intervention          | How long did the intervention last (to the nearest week)? If this is not known or reported, please state unknown.                                                 | An intervention that comprises of 6 weekly modules would be 6 weeks long.                                                                                                                                                                                                                                                                                                                                                                                                         |
| 25. Adherence to the intervention         | There are often many measures of adherence to interventions. Please state the measure reported (where possible) in the text box along with the rate of adherence. | If an intervention comprised of 6 weekly modules and the average number of modules completed was 4, then, on average, 66% of the intervention was adhered to.                                                                                                                                                                                                                                                                                                                     |

1  
2  
3  
4  
5  
6  
7  
8  
9  
10  
11  
12  
13  
14  
15  
16  
17  
18  
19  
20  
21  
22  
23  
24  
25  
26  
27  
28  
29  
30  
31  
32  
33  
34  
35  
36  
37  
38  
39  
40  
41  
42  
43  
44  
45  
46  
47

For peer review only

Supplementary Materials 1

PRISMA-P Checklist

PRISMA-P (Preferred Reporting Items for Systematic review and Meta-Analysis Protocols) 2015 checklist: recommended items to address in a systematic review protocol\*

Page and line numbers, emboldened and in parentheses, indicate the location of the PRISMA-P item in the corresponding manuscript.

| Section and topic                 | Item No | Checklist item                                                                                                                                                                                                |
|-----------------------------------|---------|---------------------------------------------------------------------------------------------------------------------------------------------------------------------------------------------------------------|
| <b>ADMINISTRATIVE INFORMATION</b> |         |                                                                                                                                                                                                               |
| Title:                            |         |                                                                                                                                                                                                               |
| Identification                    | 1a      | Identify the report as a protocol of a systematic review ( <b>p. 1</b> )                                                                                                                                      |
| Update                            | 1b      | If the protocol is for an update of a previous systematic review, identify as such ( <b>NA</b> )                                                                                                              |
| Registration                      | 2       | If registered, provide the name of the registry (such as PROSPERO) and registration number ( <b>p. 2</b> )                                                                                                    |
| Authors:                          |         |                                                                                                                                                                                                               |
| Contact                           | 3a      | Provide name, institutional affiliation, e-mail address of all protocol authors; provide physical mailing address of corresponding author ( <b>p. 1</b> )                                                     |
| Contributions                     | 3b      | Describe contributions of protocol authors and identify the guarantor of the review ( <b>p. 18</b> )                                                                                                          |
| Amendments                        | 4       | If the protocol represents an amendment of a previously completed or published protocol, identify as such and list changes; otherwise, state plan for documenting important protocol amendments ( <b>NA</b> ) |
| Support:                          |         |                                                                                                                                                                                                               |
| Sources                           | 5a      | Indicate sources of financial or other support for the review ( <b>p. 18</b> )                                                                                                                                |
| Sponsor                           | 5b      | Provide name for the review funder and/or sponsor ( <b>NA</b> )                                                                                                                                               |
| Role of sponsor or funder         | 5c      | Describe roles of funder(s), sponsor(s), and/or institution(s), if any, in developing the protocol ( <b>NA</b> )                                                                                              |
| <b>INTRODUCTION</b>               |         |                                                                                                                                                                                                               |
| Rationale                         | 6       | Describe the rationale for the review in the context of what is already known ( <b>p.4-7</b> )                                                                                                                |
| Objectives                        | 7       | Provide an explicit statement of the question(s) the review will address with reference to participants, interventions, comparators, and outcomes (PICO) ( <b>p. 7 and p. 10-11</b> )                         |
| <b>METHODS</b>                    |         |                                                                                                                                                                                                               |

|                                    |     |                                                                                                                                                                                                                                                                      |
|------------------------------------|-----|----------------------------------------------------------------------------------------------------------------------------------------------------------------------------------------------------------------------------------------------------------------------|
| Eligibility criteria               | 8   | Specify the study characteristics (such as PICO, study design, setting, time frame) and report characteristics (such as years considered, language, publication status) to be used as criteria for eligibility for the review (p. 10-11)                             |
| Information sources                | 9   | Describe all intended information sources (such as electronic databases, contact with study authors, trial registers or other grey literature sources) with planned dates of coverage (p. 11)                                                                        |
| Search strategy                    | 10  | Present draft of search strategy to be used for at least one electronic database, including planned limits, such that it could be repeated (see Supplementary Materials 2)                                                                                           |
| Study records:                     |     |                                                                                                                                                                                                                                                                      |
| Data management                    | 11a | Describe the mechanism(s) that will be used to manage records and data throughout the review (p. 12)                                                                                                                                                                 |
| Selection process                  | 11b | State the process that will be used for selecting studies (such as two independent reviewers) through each phase of the review (that is, screening, eligibility and inclusion in meta-analysis) (p. 13)                                                              |
| Data collection process            | 11c | Describe planned method of extracting data from reports (such as piloting forms, done independently, in duplicate), any processes for obtaining and confirming data from investigators (p. 13)                                                                       |
| Data items                         | 12  | List and define all variables for which data will be sought (such as PICO items, funding sources), any pre-planned data assumptions and simplifications (see Table 2)                                                                                                |
| Outcomes and prioritization        | 13  | List and define all outcomes for which data will be sought, including prioritization of main and additional outcomes, with rationale (p.8. See also Table 2, p. 31)                                                                                                  |
| Risk of bias in individual studies | 14  | Describe anticipated methods for assessing risk of bias of individual studies, including whether this will be done at the outcome or study level, or both; state how this information will be used in data synthesis (p. 15)                                         |
| Data synthesis                     | 15a | Describe criteria under which study data will be quantitatively synthesised (p.13)                                                                                                                                                                                   |
|                                    | 15b | If data are appropriate for quantitative synthesis, describe planned summary measures, methods of handling data and methods of combining data from studies, including any planned exploration of consistency (such as I <sup>2</sup> , Kendall's $\tau$ ) (p. 13-15) |
|                                    | 15c | Describe any proposed additional analyses (such as sensitivity or subgroup analyses, meta-regression) (p. 15)                                                                                                                                                        |
|                                    | 15d | If quantitative synthesis is not appropriate, describe the type of summary planned (NA)                                                                                                                                                                              |
| Meta-bias(es)                      | 16  | Specify any planned assessment of meta-bias(es) (such as publication bias across studies, selective reporting within studies) (p. 15)                                                                                                                                |
| Confidence in cumulative evidence  | 17  | Describe how the strength of the body of evidence will be assessed (such as GRADE) (p. 15)                                                                                                                                                                           |

**\* It is strongly recommended that this checklist be read in conjunction with the PRISMA-P Explanation and Elaboration (cite when available) for important clarification on the items. Amendments to a review protocol should be tracked and dated. The copyright for PRISMA-P (including checklist) is held by the PRISMA-P Group and is distributed under a Creative Commons Attribution Licence 4.0.**

*From: Shamseer L, Moher D, Clarke M, Ghersi D, Liberati A, Petticrew M, Shekelle P, Stewart L, PRISMA-P Group. Preferred reporting items for systematic review and meta-analysis protocols (PRISMA-P) 2015: elaboration and explanation. BMJ. 2015 Jan 2;349(jan02 1):g7647.*

# BMJ Open

## Does Improving Sleep Lead to Better Mental Health? A Protocol for a Meta-Analytic Review of Randomised Controlled Trials

|                                 |                                                                                                                                                                                                             |
|---------------------------------|-------------------------------------------------------------------------------------------------------------------------------------------------------------------------------------------------------------|
| Journal:                        | <i>BMJ Open</i>                                                                                                                                                                                             |
| Manuscript ID                   | bmjopen-2017-016873.R2                                                                                                                                                                                      |
| Article Type:                   | Protocol                                                                                                                                                                                                    |
| Date Submitted by the Author:   | 18-Jul-2017                                                                                                                                                                                                 |
| Complete List of Authors:       | Scott, Alex; Sheffield University, School of Health and Related Research<br>Webb, Thomas; Sheffield University, Department of Psychology<br>Rowse, Georgina; Sheffield University, Clinical Psychology Unit |
| <b>Primary Subject Heading</b>: | Mental health                                                                                                                                                                                               |
| Secondary Subject Heading:      | Public health                                                                                                                                                                                               |
| Keywords:                       | Meta-analysis, Review, Protocol, Sleep, MENTAL HEALTH                                                                                                                                                       |
|                                 |                                                                                                                                                                                                             |

SCHOLARONE™  
Manuscripts





15 **Abstract**

16 **Introduction:** Sleep and mental health go hand-in-hand, with many, if not all, mental  
17 health problems being associated with problems sleeping. Although sleep has been traditionally  
18 conceptualized as a secondary consequence of mental health problems, contemporary views  
19 prescribe a more influential, causal role of sleep in the formation and maintenance of mental  
20 health problems. One way to evaluate this assertion is to examine the extent to which  
21 interventions that improve sleep also improve mental health. **Method and analysis:** Randomized  
22 Controlled Trials (RCTs) describing the effects of interventions designed to improve sleep on  
23 mental health will be identified via a systematic search of four bibliographic databases (in  
24 addition to a search for unpublished literature). Hedges  $g$  and associated 95% confidence  
25 intervals will be computed from means and standard deviations where possible. Following this,  
26 meta-analysis will be used to synthesize the effect sizes from the primary studies and investigate  
27 the impact of variables that could potentially moderate the effects. The Jadad scale for reporting  
28 RCTs will be used to assess study quality and publication bias will be assessed via visual  
29 inspection of a funnel plot and Egger's test alongside Orwin's fail-safe  $n$ . Finally, mediation  
30 analysis will be used to investigate the extent to which changes in outcomes relating to mental  
31 health can be attributed to changes in sleep quality. **Ethics and dissemination:** This study  
32 requires no ethical approval. The findings will be submitted for publication in a peer-reviewed  
33 journal and promoted to relevant stakeholders. **Prospero registration:** CRD42017055450

34  
35 *Keywords:* Meta-analysis; protocol; review; sleep; mental health; intervention

## Does Improving Sleep Lead to Better Mental Health?

3

**Strengths**

- The proposed review should provide reliable evidence on the effect of interventions designed to improve sleep on outcomes reflecting mental health.
- The findings of the proposed review will further elucidate the nature of the relationship between sleep and mental health.
- The GRADE system will be used to assess the strength of the evidence base and allow members of the public, researchers, and clinicians to judge the quality of the available evidence.

**Limitations**

- The proposed review will include a diverse range of interventions and target problems and so might lead to a heterogeneous group of studies. However, to mitigate this, moderation analysis will be used to investigate specific factors that might influence the effect of sleep improvement on mental health.

1  
2  
3  
4 49 **Does Improving Sleep Lead to Better Mental Health? A Protocol for a Meta-Analytic**  
5  
6 50 **Review of Randomized Controlled Trials**  
7

8 51 Difficulties sleeping and mental health problems are both public health concerns in their  
9  
10 52 own right; with each having a substantive impact on both individuals and society as a whole<sup>1-4</sup>.  
11  
12 53 However, sleep and mental health go hand-in-hand, with many, if not all, mental health problems  
13  
14 54 being associated with problems sleeping<sup>5-7</sup>. Traditionally, sleep problems have been viewed as a  
15  
16 55 consequence of mental health problems. Although this is not contested, evidence also suggests  
17  
18 56 that problems sleeping can contribute to the formation of new mental health problems<sup>8-10</sup> and to  
19  
20 57 the maintenance of existing ones<sup>11-13</sup>. In other words, sleep is now thought to have a  
21  
22 58 *bidirectional* relationship with mental health, with problems sleeping likely to influence both the  
23  
24 59 onset and trajectory of a variety of mental health difficulties. Having said this, although a number  
25  
26 60 of empirical studies have manipulated sleep and examined the impact of so doing on outcomes  
27  
28 61 related to mental health, to date there has not been a systematic review of these studies.  
29  
30 62 Consequently, the magnitude of the effect of (changes in) sleep on mental health problems is  
31  
32 63 difficult to estimate and has not been compared between different mental health outcomes and  
33  
34 64 other factors that might influence the effect (e.g., across different groups of participants, research  
35  
36 65 designs, and approaches to intervention).  
37  
38  
39  
40  
41  
42

43 66 The potential for a causal relationship between sleep and mental health also raises an  
44  
45 67 exciting prospect; namely, that interventions designed to improve sleep could also improve  
46  
47 68 mental health. Providing a definitive answer to this question would have important implications  
48  
49 69 for clinicians, researchers, and members of the public alike. From a practical perspective, if  
50  
51 70 interventions designed to improve sleep can change mental health outcomes, then they may be a  
52  
53 71 useful tool for tackling mental health difficulties. Indeed, interventions designed to improve  
54  
55  
56  
57  
58  
59  
60

Does Improving Sleep Lead to Better Mental Health?

5

1  
2  
3 72 sleep can often be delivered remotely, in self-help and group formats, and / or at little cost  
4  
5 73 through the internet<sup>14-18</sup>. For example, a meta-analysis by Ho et al. reported that self-help  
6  
7  
8 74 interventions based on the principles of CBT for insomnia (termed CBTi) had medium-to-large  
9  
10 75 effects on the symptoms of insomnia<sup>18</sup>.

## 76 **Current evidence on the relationship between sleep and mental health**

77 The relationship between sleep and mental health is well documented, with numerous  
78 reviews testifying to a robust link between the two<sup>6-8 19-24</sup>. However, the majority of these  
79 reviews have focused on primary studies with correlational research designs. That is, they; i)  
80 measure associations between variables at a single time point (i.e., cross-sectional designs); ii)  
81 measure associations between variables at multiple time points (i.e., longitudinal designs); or iii)  
82 compare the typical sleep profiles of those with mental health difficulties to those without<sup>6 7 25 26</sup>.  
83 Unfortunately, cross-sectional designs simply tell us that variables are associated in some way. It  
84 is impossible to determine whether sleep causes mental health problems, mental health problems  
85 cause difficulties sleeping, or whether the effect is bidirectional in nature.

86 Longitudinal studies, although still correlational in nature, are better able to elucidate  
87 causality than their cross-sectional counterparts. However, only a handful of reviews have  
88 provided evidence on the relationship between sleep (at one point in time) and mental health  
89 outcomes (measured later). Furthermore, all of these have focused on depression<sup>8 24 27 28</sup>. For  
90 example, Baglioni et al.<sup>8</sup> meta-analysed 21 studies that investigated the longitudinal associations  
91 between insomnia and depression. Baglioni et al. reported that people with insomnia had a  
92 twofold risk of developing depression compared to people who did not experience difficulties  
93 sleeping. Longitudinal designs are also still susceptible to the 'third variable problem'<sup>29-31</sup>.  
94 Namely, that a third, unmeasured variable (e.g., having young children) could cause both sleep

## Does Improving Sleep Lead to Better Mental Health?

6

1  
2  
3 95 difficulties and mental health problems. In summary, correlational designs are not a valid way of  
4  
5 96 disentangling the relationship between problems sleeping and mental health.  
6  
7

8 97 Some reviews have assessed the impact of interventions designed to improve sleep on  
9  
10 98 mental health outcomes<sup>17 18 23 24 32-36</sup>. However, for a number of reasons, even these reviews do  
11  
12 99 not permit us to draw robust conclusions as to the causal impact of sleep quality on mental health  
13  
14 100 outcomes. First, these reviews often include interventions that have not successfully manipulated  
15  
16 101 sleep (i.e., studies in which there was no significant impact of the intervention on sleep  
17  
18 102 outcomes). Such studies do not tell us anything about the relationship between sleep and mental  
19  
20 103 health other than that it can be difficult to improve sleep. Second, the focus of extant reviews has  
21  
22 104 been on improving sleep, with the measurement of mental health outcomes being secondary and  
23  
24 105 typically limited to depression and anxiety. Consequently, the effect of improving sleep on other  
25  
26 106 mental health problems is currently unclear.  
27  
28  
29  
30

31 107 Finally, to our knowledge, to date there has been no attempt to investigate variables that  
32  
33 108 influence – or *moderate* – the impact of interventions that improve sleep on mental health.  
34  
35 109 However, interventions designed to improve sleep are likely to vary in their content and delivery,  
36  
37 110 and such variables may influence how effective they are (or appear to be) in improving sleep and  
38  
39 111 / or mental health outcomes. Furthermore, variables related to the nature of the sample (e.g., age,  
40  
41 112 severity of symptoms, nature of the mental health problem) and methodological features of the  
42  
43 113 study (e.g., self-report vs. objective assessment of the outcome variables) are likely to influence  
44  
45 114 the apparent effect of the intervention. It is therefore crucial that the impact of such variables is  
46  
47 115 systematically examined across the extant evidence base in order to draw reliable and valid  
48  
49 116 conclusions about the impact of changes in sleep on outcomes pertaining to mental health.  
50  
51  
52  
53  
54  
55  
56  
57  
58  
59  
60

Does Improving Sleep Lead to Better Mental Health?

7

1  
2  
3 117 **The proposed review**  
4

5 118 A number of primary research studies have experimentally manipulated sleep (typically  
6  
7  
8 119 via some sort of psychological intervention) and then measured mental health outcomes.  
9  
10 120 However, as described above, these individual studies have, to our knowledge, never been  
11  
12 121 integrated in a manner that allows the magnitude of the effect of sleep quality on mental health  
13  
14 122 outcomes to be estimated. Therefore, it is currently difficult to; i) draw firm conclusions about  
15  
16 123 the relationship between sleep and various mental health problems; and ii) recommend with any  
17  
18 124 confidence that mental health problems might be tackled using interventions that have been  
19  
20 125 designed to improve sleep. Furthermore, to date there has been no attempt to understand the  
21  
22 126 factors that influence, or moderate, the effect of improvements in sleep on mental health. As a  
23  
24 127 consequence it is currently unclear whether and how the content and nature of the  
25  
26 128 intervention(s), target sample and mental health problem, and methodological features of the  
27  
28 129 primary study influence the effects of interventions designed to improve sleep on mental health  
29  
30  
31  
32  
33  
34 130 outcomes.

35  
36 131 **Objectives**  
37

38  
39 132 The proposed review therefore has two broad objectives; i) to synthesize and quantify the  
40  
41 133 effect of interventions that improve sleep on outcomes reflecting mental health; and ii) to explore  
42  
43 134 variables that moderate the effect of interventions targeting sleep on outcomes reflecting mental  
44  
45 135 health.  
46  
47

48 136 **Method and Analysis**  
49

50 137 This protocol has been prepared in accordance with the Preferred Reporting Items for  
51  
52 138 Systematic Reviews and Meta-Analyses Protocol (PRISMA-P, see Supplementary Materials 1)  
53  
54 139 checklist<sup>37</sup>.  
55  
56  
57  
58  
59  
60

## 140 **Outcomes and Prioritization**

### 141 *Measuring improvements in sleep*

142 The concept of ‘improved sleep’ is multifaceted and can mean different things to  
143 different people<sup>38-40</sup>. Indeed, many specific sleep problems are tied to mental health in unique  
144 ways and often have their own unique measures. For example, the experience of nightmares has  
145 been found to be associated with post-traumatic stress disorder (PTSD)<sup>41</sup>, as measured using  
146 specific outcome measures such as dream diaries<sup>42 43</sup> or the Clinician-Administered PTSD Scale  
147 (CAPS)<sup>44</sup>. Consequently, one challenge for the proposed review is to ensure that all of the  
148 primary studies assess a similar notion of sleep improvement. To achieve this, the proposed  
149 review will require that the primary studies report a measure that reflects the overall quality of  
150 sleep experienced by participants. Broadly speaking, sleep quality consists of; (i) sleep continuity  
151 (e.g., sleep onset, sleep maintenance, and number of awakenings); and (ii) daytime impact (e.g.,  
152 the extent to which the person feels refreshed on waking and throughout the day)<sup>39 40</sup>.

153 Sleep quality can be measured using both self-report and objective indices. For example,  
154 the Pittsburgh Sleep Quality Index<sup>45</sup> (PSQI) is widely recognized as the ‘gold standard’ self-  
155 report measure of sleep quality and consists of 19 items measuring 7 aspects of sleep quality  
156 (namely, subjective sleep quality, sleep latency, sleep duration, sleep efficiency, sleep  
157 disturbances, use of sleep medication, and daytime dysfunction). The ‘gold standard’ for  
158 objectively measuring sleep is accepted to be polysomnography (PSG)<sup>46</sup>; a technique that  
159 monitors multiple biophysiological parameters and directly records aspects of sleep quality  
160 including sleep onset and sleep maintenance (for a review, see <sup>47</sup>). As such, the proposed review  
161 will include both self-report and objective indices of sleep quality, but will also seek to compare

## Does Improving Sleep Lead to Better Mental Health?

9

1  
2  
3 162 effect sizes between different measures in an effort to empirically examine the extent to which  
4  
5 163 the nature of the measures influences the apparent effect of the interventions.

7  
8 164 ***Measuring mental health***

9  
10 165 Measuring mental health is also complex and multifaceted, with a range of different  
11  
12 166 outcomes which differ both in their administration and interpretation. Some studies will report a  
13  
14 167 general measure assessing a specific diagnostic category (e.g., a measure of the severity of  
15  
16 168 depression). For example, the Beck Depression Inventory II is a 21 item self-report measure  
17  
18 169 designed to assess multiple facets of depression including mood, pessimism, self-dislike, loss of  
19  
20 170 appetite, and social withdrawal, with higher scores indicating more severe depression<sup>48</sup>. Other  
21  
22 171 studies might assess a single symptom or problem. For example, the Green Paranoid Thoughts  
23  
24 172 Scale (GPTS) measures paranoid thoughts<sup>49</sup>; an experience that is associated with, but is not  
25  
26 173 limited to, psychosis spectrum disorders<sup>50 51</sup>. Finally, some studies may report the effects of  
27  
28 174 interventions designed to improve sleep on global measures of mental health. For example, the  
29  
30 175 Clinical Global Impressions Severity scale (CGI-S)<sup>52</sup> asks clinicians to use their clinical  
31  
32 176 experience to rate how mentally ill their client has been over the last week, on a scale ranging  
33  
34 177 from 1 – *normal* to 7 – *amongst the most extremely ill patients*.

35  
36 178 Measures assessing aspects of mental health can either be; (i) self-reported by the  
37  
38 179 participant, or (ii) completed on behalf of the participant by a clinician or other independent  
39  
40 180 rater. Both self-report and independently rated outcome measures will be included in the  
41  
42 181 proposed review; however, as above, we will compare effect sizes between different measures in  
43  
44 182 an effort to empirically examine the extent to which the nature of the measure(s) influences the  
45  
46 183 apparent effect of the interventions.



**Eligibility Criteria*****Inclusion criteria***

In order to be included in the proposed review, the primary studies need to:

1. Randomly allocate participants to either an experimental group that receives an intervention that is designed to improve sleep or a comparison group.
2. Report a statistically significant improvement at on a measure of sleep quality at least one follow-up point among participants in the experimental group as compared to those in the comparison group.
3. Include a measure of mental health subsequent to the measure of sleep quality.
4. Report sufficient data for us to be able to compute effect sizes reflecting the impact of the intervention on i) sleep quality and ii) mental health. Where sufficient data is not reported, we will contact the authors and request further data. However, if this is not provided, then the study will not be included in the review.
5. Be written in English, or be able to be translated using available translation resources.

***Exclusion criteria***

The aim of the proposed review is to be as inclusive as possible and address potential differences between the primary studies (e.g., differences in the nature of the intervention or the mental health problem under consideration) using moderation analysis. Therefore, we will not restrict the type of intervention (e.g., psychological and pharmacological), publication status, nature of the comparison condition, or sample (i.e., interventions directed toward adults, children, and adolescents will all be eligible). However, in order to ensure that we can reliably and validly assess the independent contribution of changes in sleep on mental health outcomes among adult populations, studies with the following characteristics will be excluded:

## Does Improving Sleep Lead to Better Mental Health?

11

- 1  
2  
3 207 1. Studies where the intervention contains elements that specifically target a mental health  
4  
5 208 problem alongside improving sleep (e.g., an intervention that provides CBT for anxiety  
6  
7 209 alongside efforts to improve sleep).
- 10 210 2. Studies that recruit children and young people (i.e. under the age of 18 years old).
- 12  
13 211 3. Studies adopting a pre-post (or within participant) design.

**Information Sources**

15 212  
16  
17 213 The proposed review will use a combination of search techniques and sources in order to  
18  
19 214 identify potential studies. First, we will search MEDLINE (1946 to present), Embase (1974 to  
20  
21 215 present), PsycINFO (1967 to present), and The Cochrane Library(1898 to present) using the  
22  
23 216 Cochrane Highly Sensitive Search Strategy<sup>53</sup> to identify RCTs that include terms relating to sleep  
24  
25 217 quality and/or sleep disorders and mental health (see Table 1 for a list of the proposed search  
26  
27 218 terms). The search strategy has been developed in collaboration with a health sciences librarian  
28  
29 219 specializing in systematic search procedures and will be used to search each database (see  
30  
31 220 Supplementary Materials 2 for an example search strategy). Second, the reference lists of extant  
32  
33 221 reviews of the relationship between sleep and mental health (e.g., those cited in the introduction)  
34  
35 222 will be searched for any potential articles. Third, a search for any unpublished or ongoing studies  
36  
37 223 will be conducted by searching online databases including White Rose Online, The National  
38  
39 224 Research Register, WHO approved clinical trial databases (e.g. ISRCTN), and PROSPERO.  
40  
41 225 Finally, the authors of articles deemed eligible for inclusion will be contacted and asked if they  
42  
43 226 are aware of any unpublished research that may be eligible for inclusion in the review.

**Data management**

50 227  
51  
52 228 All records will be stored in the reference management software Endnote, and we will  
53  
54 229 follow PRISMA guidelines for the selection of studies for meta-analysis<sup>54</sup>. Specifically, when  
55  
56  
57  
58  
59  
60

Does Improving Sleep Lead to Better Mental Health?

12

1  
2  
3 230 the pool of potential studies has been identified, we will remove duplicates and initially screen  
4  
5  
6 231 each record based on the title and abstract and exclude clearly ineligible studies. Following this  
7  
8 232 initial screening, the full-text versions of each article will be reviewed in detail and cross-  
9  
10 233 referenced against the inclusion and exclusion criteria. The flow of articles through the review,  
11  
12 234 including the reasons for excluding studies, will be documented in a PRISMA flow chart.

### 235 **Data Extraction**

16  
17 236 Data will be recorded on a standardized data extraction form and a manual will  
18  
19  
20 237 accompany this form and detail each variable to be extracted alongside definitions and examples  
21  
22 238 (see Supplementary Materials 3 and 4). Two reviewers will pilot the data extraction forms and  
23  
24 239 manual on three articles in order to ensure that there are no systematic problems or difficulties  
25  
26  
27 240 coding any of the variables. After this, the data will be extracted from the full set of studies by  
28  
29 241 one reviewer. A second member of the review team will second code a subset of the included  
30  
31 242 articles (at least 10%) and levels of agreement will be calculated (the subset of articles for second  
32  
33 243 coding will be randomly selected using a computer generated algorithm). Any disagreements  
34  
35  
36 244 will be resolved through discussion, with a third member of the review team acting as arbiter for  
37  
38 245 any outstanding disagreements. The review team will extract meta-data pertaining to source  
39  
40 246 characteristics (e.g., publication status and year), as well as data relating to the characteristics of  
41  
42 247 the sample (e.g., age, type of mental health problem), the study (e.g., the nature of the  
43  
44 248 comparison group, length of follow-up), and characteristics of the intervention (e.g., theoretical  
45  
46 249 basis, mode of delivery). Table 2 provides an overview of the potential moderators that we  
47  
48  
49 250 propose to code and examine and Supplementary Materials 3 provides detail on specific  
50  
51 251 moderator levels and categories.  
52  
53  
54  
55  
56  
57  
58  
59  
60

Version 3: 11/07/2017

**Proposed Analysis**

Review Manager 5.3 (Cochrane Collaboration,<sup>55</sup> will be used to compute Hedges  $g$  (and associated 95% confidence intervals) using the means and standard deviations for each measure of sleep quality and mental health reported in studies comparing these outcomes between an intervention group (i.e., a group receiving an intervention that improves sleep) and a comparison group (e.g., wait-list, placebo, treatment as usual)<sup>1</sup>. Where means and standard deviations are not available, we will compute effect sizes by converting relevant summary statistics (e.g.,  $F$  values from an ANOVA testing the impact of an intervention on relevant outcomes) using Lyons Morris' meta-analysis calculator<sup>56</sup>. The effect of the interventions on sleep quality will be assessed using data from the first available follow-up point that reports a statistically significant difference in sleep quality between the intervention and comparison conditions. The effect of the interventions on outcomes pertaining to mental health will be assessed at the longest follow-up point available, whether the effect at this point is statistically significant or not (and we will investigate the effect of follow-up duration on outcomes using moderation analysis). This strategy will provide a stringent test of the effect of the interventions on outcomes pertaining to mental health (in the sense that any changes need to have been maintained over time) and also enable us to investigate whether the impact of the interventions on outcomes is mediated by changes in sleep quality that precede the impact on outcomes pertaining to mental health (this proposed analysis is discussed in detail below).

---

<sup>1</sup> Where available, data that has been adjusted for baseline differences between groups will be used to compute effect sizes. However, if this information is not reported then we will use the unadjusted data to compute the effect sizes. We will also seek to compute effect sizes using the data from Intention to Treat (ITT) analyses where they are reported. Subscripts will be added to the table reporting the effect sizes derived from the primary research studies in order to identify how each effect size was computed and also to compare outcomes between studies that report adjusted vs. unadjusted statistics and ITT analyses vs. non-ITT analyses.

1  
2  
3 271 Where studies report multiple outcome measures under one diagnostic category (e.g.,  
4  
5  
6 272 several measures of depression or sleep quality), the effect sizes will be computed for each  
7  
8 273 outcome and meta-analyzed in their own right to form one overall effect for inclusion in the main  
9  
10 274 analysis. For example, we would compute two effect sizes reflecting sleep quality if a study  
11  
12 275 reported the effects of an intervention on the Pittsburgh Sleep Quality Index<sup>45</sup> and the Insomnia  
13  
14 276 Severity Index<sup>57</sup> (i.e., one effect size for each measure of sleep quality) and then average them  
15  
16 277 before inclusion in the main dataset. This procedure capitalizes on the information that is  
17  
18 278 available, while retaining the independence of effect sizes which is central to the validity of  
19  
20 279 meta-analysis<sup>58</sup>.

21  
22  
23  
24 280 The sample-weighted average effect size ( $g_+$ ) will be computed using a random effects  
25  
26 281 model as studies are likely to be “different from one another in ways too complex to capture by a  
27  
28 282 few simple study characteristics”<sup>59</sup>. Following Cohen’s<sup>60</sup> recommendations,  $g = 0.20$  will be  
29  
30 283 taken to represent a ‘small’ effect size,  $g = 0.50$  a ‘medium’ effect size, and  $g = 0.80$  a ‘large’  
31  
32 284 effect size. We will use these qualitative indices to interpret the findings. Publication bias will be  
33  
34 285 assessed via visual inspection of a funnel plot and Egger’s test<sup>61</sup>. Finally, Orwin’s<sup>62</sup> formula will  
35  
36 286 be used to determine the fail-safe  $n$  (i.e., the number of studies producing a null effect that would  
37  
38 287 be needed to reduce the overall effect of interventions that improve sleep on outcomes relating to  
39  
40 288 mental health to a trivial effect size).

### 289 **Heterogeneity, Bias and Study Quality**

41  
42  
43  
44  
45  
46 290 The  $I^2$  statistic will be used to assess the heterogeneity of effect sizes across the primary  
47  
48 291 studies<sup>63</sup>. The quality of each individual study included in the proposed review will be assessed  
49  
50 292 using the Jadad scale for reporting RCTs<sup>64</sup>. The Jadad scale assesses three key areas of  
51  
52 293 methodological quality that potentially lead to bias – namely; randomization, blinding, and the  
53  
54  
55  
56  
57  
58  
59  
60

Does Improving Sleep Lead to Better Mental Health?

15

1  
2  
3 294 flow of participants through the study. In order to assess these areas, raters will be asked to  
4  
5 295 answer three questions: i) “*Was the study described as randomized (i.e., does it include words*  
6  
7 296 *such as randomly, random, and randomization)?*”; ii) “*Was the study described as double*  
8  
9 297 *blind?*”; and iii) “*Was there a description of withdrawals and dropouts?*”. Scores on the Jadad  
10  
11 298 scale range from 0 to 5, with higher scores indicating a lower risk of bias (and therefore higher  
12  
13 299 methodological quality). The Jadad scale for reporting RCTs has been extensively used as a  
14  
15 300 measure of the methodological quality of RCTs (having received over 7,500 citations to date)  
16  
17 301 and has been recommended as the most reliable and valid scale for assessing the quality of  
18  
19 302 RCTs, in a review of 21 measures<sup>65</sup>. Finally, the Grading of Recommendations, Assessment,  
20  
21 303 Development, and Evaluation (GRADE) system<sup>66 67</sup> will be used to assess the quality of the body  
22  
23 304 of evidence as a whole and the extent to which it can and should be used to inform clinical  
24  
25 305 recommendations.  
26  
27  
28  
29  
30

### 31 306 **Moderation Analysis**

32 307 Moderation analyses will be used to identify variables that influence the effect of  
33  
34 308 interventions that improve sleep on both mental health. Many of these variables and their sub-  
35  
36 309 categories are outlined in Table 2 (for more detail see Supplementary Materials 3); however, we  
37  
38 310 are keen to be flexible and responsive to the literature as the search develops. Imposing an  
39  
40 311 exhaustive coding structure *a priori* without knowledge of the primary studies included in the  
41  
42 312 review may result in an unsuitable structure that does not accurately reflect the nature of the  
43  
44 313 included studies. Consequently, Table 2/Supplementary Materials 3 is not intended to provide an  
45  
46 314 exhaustive list of moderators and we are open to considering additional moderators and  
47  
48 315 categories as the search and data-extraction develops. However, in order to ensure that the reader  
49  
50 316 is clear on what analyses were pre-planned, we will label any analyses that are *not* pre-specified  
51  
52  
53  
54  
55  
56  
57  
58  
59  
60

Version 3: 11/07/2017

1  
2  
3 317 in this protocol as exploratory in the final report. Moderation analysis will be undertaken to  
4  
5 318 explore the effect of variables relating to the nature of the focal sample, the methodological  
6  
7 319 design and intervention characteristics across all studies within the main meta-analyses.

8  
9  
10 320 We will require a minimum of  $k = 3$  studies representing each moderator level category in  
11  
12 321 order to conduct moderation analysis (e.g., to investigate the effect of outcome type on effect  
13  
14 322 sizes we will require data from at least 3 studies using self-report outcomes and at least 3 studies  
15  
16 323 using clinician completed outcomes). For continuous moderators (e.g., age, publication year,  
17  
18 324 study quality), sample weighted meta-regression will be used to investigate the impact of the  
19  
20 325 moderator on effect sizes. For example, the quality of a given study, assessed using the Jadad  
21  
22 326 scale<sup>64</sup>, will be used as the independent variable in a sample-weighted meta-regression, with the  
23  
24 327 effect sizes representing the effect of the interventions on outcomes pertaining to mental health  
25  
26 328 used as the dependent variable. For categorical variables (e.g., self-report vs. clinician rated  
27  
28 329 outcomes, the nature of the comparison condition), the sample-weighted average effect size ( $g_+$ )  
29  
30 330 and associated standard errors will be computed for each level of the moderator and then the  $Q$   
31  
32 331 statistic will be used to assess if the effect sizes are significantly different. For example, effect  
33  
34 332 sizes based on clinician rated measures of mental health (e.g., the Clinical Global Impressions  
35  
36 333 Severity Scale<sup>52</sup>) will be compared to effect sizes based on self-report measures of mental health  
37  
38 334 (e.g., the Depression, Anxiety, and Stress Scale<sup>68</sup>).

### 335 **Mediation Analysis**

336 Mediation analysis will be used to investigate the extent to which changes in mental  
337 health can be attributed to changes in sleep. These analyses will include all studies that report the  
338 correlation between (changes in) sleep quality and (changes in) mental health outcomes (the  
339 correlation between the intervention and sleep quality and mental health outcomes, respectively,



## Does Improving Sleep Lead to Better Mental Health?

17

1  
2  
3 340 will be computed by converting the sample-weighted average effect of the interventions on these  
4  
5 341 outcomes into effect size  $r$ ). These (sample-weighted, average) correlations will be entered using  
6  
7 342 the matrix function into SPSS to permit analysis as if they resulted from a primary dataset. In  
8  
9 343 line with Kenny, Kashy, and Bolger's<sup>69</sup> recommendations, we will then conduct 4 multiple  
10  
11 344 regressions in order to investigate mediation. These regressions will test; i) the effect of the  
12  
13 345 independent variable (i.e., the intervention) on the dependent variable (i.e., outcomes reflecting  
14  
15 346 mental health); ii) the effect of the independent variable on the putative mediator (i.e., outcomes  
16  
17 347 reflecting sleep quality); iii) the effect of the mediating variable on the dependent variable; and  
18  
19 348 iv) the simultaneous effect of the independent variable and the mediator on the dependent  
20  
21 349 variable, respectively. If the effect of the interventions on mental health can be attributed to  
22  
23 350 changes in the quality of sleep, then the impact of the interventions on outcomes pertaining to  
24  
25 351 mental health should be significantly reduced when the effect of the interventions on sleep  
26  
27 352 quality is statistically controlled.  
28  
29  
30  
31  
32

**353 Ethics and Dissemination**

354 As the proposed research is a meta-analytic review of primary studies, no ethical  
355 approval is required. We have registered the proposed review on the PROSPERO database  
356 (CRD42017055450) in order to adhere to the principles of open research. Following completion  
357 of the review, we will submit the findings for publication in a peer reviewed academic journal  
358 and attend conferences and dissemination events with stakeholders where possible.  
359

**359 Discussion**

360 The proposed review will use meta-analysis alongside moderator and (meta)mediation  
361 analyses to i) quantify the effect of interventions that improve sleep on mental health outcomes;  
362 ii) test whether any effect of the interventions on these outcomes is mediated by changes in sleep  
363



## Does Improving Sleep Lead to Better Mental Health?

18

1  
2  
3 363 quality, and iii) explore variables that potentially moderate the effect of the interventions  
4  
5  
6 364 targeting sleep on mental health outcomes. The proposed review has a number of strengths that  
7  
8 365 we believe mean that it will make a substantive contribution. First, the review will be inclusive  
9  
10 366 and investigate the effect of improving sleep on a wide range of mental health problems. Second,  
11  
12 367 the review will further elucidate our understanding of the causal relationship between sleep and  
13  
14 368 mental health by including only studies that successfully manipulate sleep and by conducting a  
15  
16 369 mediation analysis to investigate whether any changes in mental health can be attributed to  
17  
18 370 changes in sleep. Finally, the GRADE system will be used to assess the strength of the evidence  
19  
20 371 base<sup>66 67</sup> which should allow members of the public, researchers, and clinicians to quickly access  
21  
22 372 the available evidence and judge its quality.  
23  
24  
25  
26

27 373 Despite the strengths of the proposed review, however, the wide range of interventions  
28  
29 374 and target problems that are likely to be addressed by the primary research studies may lead to a  
30  
31 375 relatively heterogeneous group of studies (and thus, potentially effect sizes) which may lead to  
32  
33 376 concerns that we are not comparing ‘like with like’ (cf. the problem of mixing apples and  
34  
35 377 oranges<sup>70</sup>) and limit the extent to which the findings can be generalized to a specific population  
36  
37 378 (e.g., to those with depression). However, to mitigate these concerns we will use moderation  
38  
39 379 analysis to investigate specific factors that might influence the effect of improvements in sleep  
40  
41 380 on mental health and to estimate the sample-weighted average effect sizes for different types of  
42  
43 381 interventions and on different mental health outcomes. Our hope is that these analyses prove  
44  
45 382 informative, both in understanding mental health problems (i.e., for which mental health  
46  
47 383 problems can changes in sleep quality be expected to influence outcomes?) and in developing  
48  
49 384 interventions designed to mitigate these problems (e.g., the review will be able to identify which  
50  
51 385 interventions are most effective).  
52  
53  
54  
55  
56  
57  
58  
59  
60

Does Improving Sleep Lead to Better Mental Health?

19

1  
2  
3 386 **Author Contributions**  
4

5 387 The first author (AJS) had the idea for the proposed review and approached TLW and  
6  
7  
8 388 GR, who contributed to the design of the research. AJS drafted the protocol and TLW and GR  
9  
10 389 provided detailed comments before submission. AJS is the identified guarantor of the review.  
11

12  
13 390 **Funding Statement**  
14

15 391 This research has not yet received any funding from the public, commercial or not-for-  
16  
17 392 profit sectors.  
18

19  
20 393 **Competing Interests**  
21

22 394 We have no competing interests to declare.  
23  
24  
25  
26  
27  
28  
29  
30  
31  
32  
33  
34  
35  
36  
37  
38  
39  
40  
41  
42  
43  
44  
45  
46  
47  
48  
49  
50  
51  
52  
53  
54  
55  
56  
57  
58  
59  
60

395

**References**

1. Colten HR, Altevogt BM. Sleep disorders and sleep deprivation: An unmet public health problem: National Academies Press 2006.
2. Patel V, Flisher AJ, Hetrick S, et al. Mental health of young people: A global public-health challenge. *The Lancet* 2007;369(9569):1302-13. doi: 10.1016/S0140-6736(07)60368-7
3. Robotham D. Sleep as a public health concern: Insomnia and mental health. *Journal of Public Mental Health* 2011;10(4):234-37. doi: 10.1108/17465721111188250
4. Prince M, Patel V, Saxena S, et al. No health without mental health. *The Lancet* 2007;370(9590):859-77. doi: 10.1016/S0140-6736(07)61238-0
5. Ford DE, Kamerow DB. Epidemiologic study of sleep disturbances and psychiatric disorders: An opportunity for prevention? *JAMA* 1989;262(11):1479-84. doi: 10.1001/jama.1989.03430110069030
6. Baglioni C, Nanovska S, Regen W, et al. Sleep and mental disorders: A meta-analysis of polysomnographic research. *Psychological Bulletin* 2016;14:14. doi: 10.1037/bul0000053
7. Benca RM, Obermeyer WH, Thisted RA, et al. Sleep and psychiatric disorders - a meta-analysis. *Archives of General Psychiatry* 1992;49(8):651-68. doi: 10.1001/archpsyc.1992.01820080059010
8. Baglioni C, Battagliese G, Feige B, et al. Insomnia as a predictor of depression: A meta-analytic evaluation of longitudinal epidemiological studies. *Journal of Affective Disorders* 2011;135(1):10-19. doi: 10.1016/j.jad.2011.01.011

- 1  
2  
3 416 9. Gregory AM, Rijsdijk FV, Lau J, et al. The direction of longitudinal associations between  
4  
5 417 sleep problems and depression symptoms: A study of twins aged 8 and 10 years. *Sleep*  
6  
7 418 2009;32(2):189-99.
- 8  
9  
10 419 10. Breslau N, Roth T, Rosenthal L, et al. Sleep disturbance and psychiatric disorders: A  
11  
12 420 longitudinal epidemiological study of young adults. *Biological Psychiatry*  
13  
14 421 1996;39(6):411-18. doi: 10.1016/0006-3223(95)00188-3
- 15  
16  
17 422 11. Harvey AG. Insomnia: Symptom or diagnosis? *Clinical Psychology Review*  
18  
19 423 2001;21(7):1037-59. doi: doi.org/10.1016/S0272-7358(00)00083-0
- 20  
21  
22 424 12. Soehner AM, Kaplan KA, Harvey AG. Insomnia comorbid to severe psychiatric illness. *Sleep*  
23  
24 425 *Medicine Clinics* 2013;8(3):361-71. doi: 10.1016/j.jsmc.2013.04.007
- 25  
26  
27 426 13. Freeman D, Stahl D, McManus S, et al. Insomnia, worry, anxiety and depression as  
28  
29 427 predictors of the occurrence and persistence of paranoid thinking. *Social Psychiatry and*  
30  
31 428 *Psychiatric Epidemiology* 2012;47(8):1195-203. doi: 10.1007/s00127-011-0433-1
- 32  
33  
34 429 14. Cuijpers P, Van Straten A, Andersson G. Internet-administered cognitive behavior therapy for  
35  
36 430 health problems: A systematic review. *Journal of Behavioral Medicine* 2008;31(2):169-  
37  
38 431 77. doi: 10.1007/s10865-007-9144-1
- 39  
40  
41 432 15. Wu JQ, Appleman ER, Salazar RD, et al. Cognitive behavioral therapy for insomnia  
42  
43 433 comorbid with psychiatric and medical conditions: A meta-analysis. *JAMA Internal*  
44  
45 434 *Medicine* 2015;175(9):1461-72. doi: 10.1001/jamainternmed.2015.3006
- 46  
47  
48 435 16. van Straten A, Cuijpers P. Self-help therapy for insomnia: A meta-analysis. *Sleep Medicine*  
49  
50 436 *Reviews* 2009;13(1):61-71. doi: 10.1016/j.smr.2008.04.006
- 51  
52  
53 437 17. Koffel EA, Koffel JB, Gehrman PR. A meta-analysis of group cognitive behavioral therapy  
54  
55 438 for insomnia. *Sleep Medicine Reviews* 2015;19:6-16. doi: 10.1016/j.smr.2014.05.001
- 56  
57  
58  
59  
60

- 1  
2  
3 439 18. Ho FY, Chung KF, Yeung WF, et al. Self-help cognitive-behavioral therapy for insomnia: A  
4  
5 440 meta-analysis of randomized controlled trials. *Sleep Medicine Reviews* 2015;19:17-28.  
6  
7 441 doi: 10.1016/j.smr.2014.06.010  
8  
9  
10 442 19. Chan MS, Chung KF, Yung KP, et al. Sleep in schizophrenia: A systematic review and meta-  
11  
12 443 analysis of polysomnographic findings in case-control studies. *Sleep Medicine Reviews*  
13  
14 444 2016;10:10. doi: 10.1016/j.smr.2016.03.001  
15  
16  
17 445 20. Kobayashi I, Boarts JM, Delahanty DL. Polysomnographically measured sleep abnormalities  
18  
19 446 in ptsd: A meta-analytic review. *Psychophysiology* 2007;44(4):660-9. doi:  
20  
21 447 10.1111/j.1469-8986.2007.537.x  
22  
23  
24 448 21. Nota JA, Sharkey KM, Coles ME. Sleep, arousal, and circadian rhythms in adults with  
25  
26 449 obsessive-compulsive disorder: A meta-analysis. *Neuroscience & Biobehavioral Reviews*  
27  
28 450 2015;51:100-7. doi: 10.1016/j.neubiorev.2015.01.002  
29  
30  
31 451 22. Reeve S, Sheaves B, Freeman D. The role of sleep dysfunction in the occurrence of delusions  
32  
33 452 and hallucinations: A systematic review. *Clinical Psychology Review* 2015;42:96-115.  
34  
35 453 doi: 10.1016/j.cpr.2015.09.001  
36  
37  
38 454 23. Belleville G, Cousineau H, Levrier K, et al. Meta-analytic review of the impact of cognitive-  
39  
40 455 behavior therapy for insomnia on concomitant anxiety. *Clinical Psychology Review*  
41  
42 456 2011;31(4):638-52. doi: 10.1016/j.cpr.2011.02.004  
43  
44  
45 457 24. Lovato N, Gradisar M. A meta-analysis and model of the relationship between sleep and  
46  
47 458 depression in adolescents: Recommendations for future research and clinical practice.  
48  
49 459 *Sleep Medicine Reviews* 2014;18(6):521-9. doi: 10.1016/j.smr.2014.03.006  
50  
51  
52  
53  
54  
55  
56  
57  
58  
59  
60

- 1  
2  
3 460 25. Diaz-Roman A, Perestelo-Perez L, Buela-Casal G. Sleep in obsessive-compulsive disorder: A  
4  
5 461 systematic review and meta-analysis. *Sleep Medicine* 2015;16(9):1049-55. doi:  
6  
7 462 10.1016/j.sleep.2015.03.020  
8  
9  
10 463 26. Chouinard S, Poulin J, Stip E, et al. Sleep in untreated patients with schizophrenia: A meta-  
11  
12 464 analysis: National Institute of Mental Health, 2004.  
13  
14  
15 465 27. Cole MG, Dendukuri N. Risk factors for depression among elderly community subjects: A  
16  
17 466 systematic review and meta-analysis. *American Journal of Psychiatry* 2003;160(6):1147-  
18  
19 467 56. doi: 10.1176/appi.ajp.160.6.1147  
20  
21  
22 468 28. Zhai L, Zhang H, Zhang D. Sleep durations and depression among adults: A meta-analysis of  
23  
24 469 prospective studies. *Depression and Anxiety* 2015;32(9):664-70. doi: 10.1002/da.22386  
25  
26  
27 470 29. Mauro R. Understanding love (left out variables error): A method for estimating the effects of  
28  
29 471 omitted variables. *Psychological Bulletin* 1990;108(2):314.  
30  
31  
32 472 30. Zapf D, Dormann C, Frese M. Longitudinal studies in organizational stress research: A  
33  
34 473 review of the literature with reference to methodological issues. *Journal of Occupational*  
35  
36 474 *Health Psychology* 1996;1(2):145. doi: 10.1037//1076-8998.1.2.145  
37  
38  
39 475 31. Duckworth AL, Tsukayama E, May H. Establishing causality using longitudinal hierarchical  
40  
41 476 linear modeling: An illustration predicting achievement from self-control. *Social*  
42  
43 477 *Psychological and Personality Science* 2010 doi: 10.1177/1948550609359707  
44  
45  
46 478 32. Tang NKY, Lereya ST, Boulton H, et al. Nonpharmacological treatments of insomnia for  
47  
48 479 long-term painful conditions: A systematic review and meta-analysis of patient-reported  
49  
50 480 outcomes in randomized controlled trials. *Sleep* 2015;38(11):1751. doi:  
51  
52 481 10.5665/sleep.5158  
53  
54  
55  
56  
57  
58  
59  
60

- 1  
2  
3 482 33. Okajima I, Komada Y, Inoue Y. A meta-analysis on the treatment effectiveness of cognitive  
4  
5 483 behavioral therapy for primary insomnia. *Sleep and Biological Rhythms* 2011;9(1):24-34.  
6  
7 484 doi: 10.1111/j.1479-8425.2010.00481.x  
8  
9  
10 485 34. Hansen K, Hoefling V, Kroener-Borowik T, et al. Efficacy of psychological interventions  
11  
12 486 aiming to reduce chronic nightmares: A meta-analysis. *Clinical Psychology Review*  
13  
14 487 2013;33(1):146-55. doi: 10.1016/j.cpr.2012.10.012  
15  
16  
17 488 35. Gupta MA, Simpson FC, Lyons DCA. The effect of treating obstructive sleep apnea with  
18  
19 489 positive airway pressure on depression and other subjective symptoms: A systematic  
20  
21 490 review and meta-analysis. *Sleep Medicine Reviews* 2016;28:55-68. doi:  
22  
23 491 10.1016/j.smrv.2015.07.002  
24  
25  
26 492 36. Ho FY-Y, Chan CS, Tang KN-S. Cognitive-behavioral therapy for sleep disturbances in  
27  
28 493 treating posttraumatic stress disorder symptoms: A meta-analysis of randomized  
29  
30 494 controlled trials. *Clinical Psychology Review* 2016;43:90-102. doi:  
31  
32 495 10.1016/j.cpr.2015.09.005  
33  
34  
35 496 37. Shamseer L, Moher D, Clarke M, et al. Preferred reporting items for systematic review and  
36  
37 497 meta-analysis protocols (prisma-p) 2015: Elaboration and explanation. *BMJ*  
38  
39 498 2015;349:g7647. doi: 10.1136/bmj.g7647  
40  
41  
42 499 38. Åkerstedt T, Hume K, Minors D, et al. The meaning of good sleep: A longitudinal study of  
43  
44 500 polysomnography and subjective sleep quality. *Journal of Sleep Research* 1994;3(3):152-  
45  
46 501 58. doi: 10.1111/j.1365-2869.1994.tb00122.x  
47  
48  
49 502 39. Harvey AG, Stinson K, Whitaker KL, et al. The subjective meaning of sleep quality: A  
50  
51 503 comparison of individuals with and without insomnia. *Sleep* 2008;31(3):383. doi:  
52  
53 504 10.1093/sleep/31.3.383  
54  
55  
56  
57  
58  
59  
60

## Does Improving Sleep Lead to Better Mental Health?

25

- 1  
2  
3 505 40. Libman E, Fichten C, Creti L, et al. Refreshing sleep and sleep continuity determine  
4  
5 506 perceived sleep quality. *Sleep Disorders* 2016;2016 doi: 10.1155/2016/7170610  
6  
7  
8 507 41. Lamarche LJ, De Koninck J. Sleep disturbance in adults with posttraumatic stress disorder: A  
9  
10 508 review. *The Journal of Clinical Psychiatry* 2007  
11  
12  
13 509 42. Mellman TA, David D, Bustamante V, et al. Dreams in the acute aftermath of trauma and  
14  
15 510 their relationship to ptsd. *Journal of Traumatic Stress* 2001;14(1):241-47. doi:  
16  
17 511 10.1023/A:1007812321136  
18  
19  
20 512 43. Levin R, Fireman G. Nightmare prevalence, nightmare distress, and self-reported  
21  
22 513 psychological disturbance. *Sleep* 2002;25(2):205-12.  
23  
24  
25 514 44. Blake DD, Weathers FW, Nagy LM, et al. The development of a clinician - administered ptsd  
26  
27 515 scale. *Journal of Traumatic Stress* 1995;8(1):75-90. doi: 10.1007/BF02105408  
28  
29  
30 516 45. Buysse DJ, Reynolds CF, Monk TH, et al. The pittsburgh sleep quality index: A new  
31  
32 517 instrument for psychiatric practice and research. *Psychiatry Research* 1989;28(2):193-  
33  
34 518 213. doi: 10.1016/0165-1781(89)90047-4  
35  
36  
37 519 46. van de Water A, Holmes A, Hurley DA. Objective measurements of sleep for non -  
38  
39 520 laboratory settings as alternatives to polysomnography - a systematic review. *Journal of*  
40  
41 521 *Sleep Research* 2011;20(1pt2):183-200. doi: 10.1111/j.1365-2869.2009.00814.x  
42  
43  
44 522 47. Vaughn BV, Giallanza P. Technical review of polysomnography. *CHEST Journal*  
45  
46 523 2008;134(6):1310-19. doi: 10.1378/chest.08-0812  
47  
48  
49 524 48. Beck AT, Steer RA, Carbin MG. Psychometric properties of the beck depression inventory:  
50  
51 525 Twenty-five years of evaluation. *Clinical Psychology Review* 1988;8(1):77-100. doi:  
52  
53 526 10.1016/0272-7358(88)90050-5  
54  
55  
56  
57  
58  
59  
60



- 1  
2  
3 527 49. Green C, Freeman D, Kuipers E, et al. Measuring ideas of persecution and social reference:  
4  
5 528 The green et al. Paranoid thought scales (gpts). *Psychological Medicine* 2008;38(01):101-  
6  
7  
8 529 11. doi: 10.1017/S0033291707001638  
9  
10 530 50. Johns LC, Cannon M, Singleton N, et al. Prevalence and correlates of self-reported psychotic  
11  
12 531 symptoms in the british population. *The British Journal of Psychiatry* 2004;185(4):298-  
13  
14 532 305. doi: 10.1192/bjp.185.4.298  
15  
16  
17 533 51. McGrath JA, Nestadt G, Liang K-Y, et al. Five latent factors underlying schizophrenia:  
18  
19 534 Analysis and relationship to illnesses in relatives. *Schizophrenia Bulletin* 2004;30(4):855.  
20  
21 535 doi: 10.1093/oxfordjournals.schbul.a007138  
22  
23  
24 536 52. Busner J, Targum SD. The clinical global impressions scale: Applying a research tool in  
25  
26 537 clinical practice. *Psychiatry* 2007;4(7):28-37.  
27  
28  
29 538 53. Robinson KA, Dickersin K. Development of a highly sensitive search strategy for the  
30  
31 539 retrieval of reports of controlled trials using pubmed. *International Journal of*  
32  
33 540 *Epidemiology* 2002;31(1):150-53. doi: 10.1093/ije/31.1.150  
34  
35  
36 541 54. Moher D, Liberati A, Tetzlaff J, et al. Preferred reporting items for systematic reviews and  
37  
38 542 meta-analyses: The prisma statement. *Journal of Clinical Epidemiology*  
39  
40 543 2009;62(10):1006-12. doi: 10.1016/j.jclinepi.2009.06.005  
41  
42  
43 544 55. Review manager (revman) [program]. 5.3 version. Copenhagen: The Nordic Cochrane  
44  
45 545 Centre: The Cochrane Collaboration, 2014.  
46  
47  
48 546 56. Lyons LC, Morris WA. Lyons-morris meta-analysis calculator 2017 [Available from:  
49  
50 547 <http://www.lyonsmorris.com/ma1/> accessed 15th May 2017.  
51  
52  
53  
54  
55  
56  
57  
58  
59  
60

- 1  
2  
3 548 57. Bastien CH, Vallières A, Morin CM. Validation of the insomnia severity index as an outcome  
4  
5 549 measure for insomnia research. *Sleep Medicine* 2001;2(4):297-307. doi: 10.1016/S1389-  
6  
7 550 9457(00)00065-4  
8  
9  
10 551 58. Scammacca N, Roberts G, Stuebing KK. Meta-analysis with complex research designs  
11  
12 552 dealing with dependence from multiple measures and multiple group comparisons.  
13  
14 553 *Review of Educational Research* 2014;84(3):328-64. doi: 10.3102/0034654313500826  
15  
16  
17 554 59. Cooper HM. Integrating research: A guide for literature reviews. London, England: Sage  
18  
19 555 1986.  
20  
21  
22 556 60. Cohen J. A power primer. *Psychological Bulletin* 1992;112(1):155. doi: 10.1037/0033-  
23  
24 557 2909.112.1.155  
25  
26  
27 558 61. Egger M, Smith GD, Schneider M, et al. Bias in meta-analysis detected by a simple,  
28  
29 559 graphical test. *BMJ* 1997;315(7109):629-34. doi: 10.1136/bmj.315.7109.629  
30  
31  
32 560 62. Orwin RG. A fail-safe n for effect size in meta-analysis. *Journal of Educational Statistics*  
33  
34 561 1983:157-59. doi: 10.2307/1164923  
35  
36  
37 562 63. Higgins JP, Thompson SG, Deeks JJ, et al. Measuring inconsistency in meta-analyses. *BMJ*  
38  
39 563 2003;327(7414):557-60. doi: 10.1136/bmj.327.7414.557  
40  
41 564 64. Jadad AR, Moore RA, Carroll D, et al. Assessing the quality of reports of randomized clinical  
42  
43 565 trials: Is blinding necessary? *Controlled Clinical Trials* 1996;17(1):1-12. doi:  
44  
45 566 10.1016/0197-2456(95)00134-4  
46  
47  
48 567 65. Olivo SA, Macedo LG, Gadotti IC, et al. Scales to assess the quality of randomized  
49  
50 568 controlled trials: A systematic review. *Physical Therapy* 2007 doi: 10.2522/ptj.20070147  
51  
52  
53  
54  
55  
56  
57  
58  
59  
60

- 1  
2  
3 569 66. Guyatt G, Oxman AD, Akl EA, et al. Grade guidelines: 1. Introduction: Grade evidence  
4  
5 570 profiles and summary of findings tables. *Journal of Clinical Epidemiology*  
6  
7 571 2011;64(4):383-94. doi: 10.1016/j.jclinepi.2010.04.026  
8  
9  
10 572 67. Guyatt GH, Oxman AD, Vist GE, et al. Grade: An emerging consensus on rating quality of  
11  
12 573 evidence and strength of recommendations. *BMJ* 2008;336(7650):924. doi:  
13  
14 574 10.1136/bmj.39489.470347.AD  
15  
16  
17 575 68. Lovibond PF, Lovibond SH. The structure of negative emotional states: Comparison of the  
18  
19 576 depression anxiety stress scales (dass) with the beck depression and anxiety inventories.  
20  
21 577 *Behaviour Research and Therapy* 1995;33(3):335-43. doi: 10.1016/0005-7967(94)00075-  
22  
23  
24 578 U  
25  
26  
27 579 69. Kenny DA, Kashy DA, Bolger N. Data analysis in social psychology. New York: Oxford  
28  
29 580 University Press 1998.  
30  
31 581 70. Barone JE. Comparing apples and oranges: A randomised prospective study. *BMJ*  
32  
33 582 2000;321(7276):1569-70. doi: 10.1136/bmj.321.7276.1569  
34  
35  
36 583

Does Improving Sleep Lead to Better Mental Health?

29

584 **Table 1**585 *Search Terms that will be used to Identify Randomized Controlled Trials of Interventions*586 *Designed to Improve Sleep on Outcomes Pertaining to Mental Health*

| 587 | <b>HSSS for RCTs<sup>a</sup></b> | <b>Sleep</b>             | <b>Mental health</b>             |
|-----|----------------------------------|--------------------------|----------------------------------|
| 588 | Randomized controlled trial      | Sleep*                   | “Psychological health”           |
| 589 | Controlled clinical trial        | “Circadian rhythm*”      | “Mental”                         |
| 590 | Randomized                       | Insomnia                 | Psychiat*                        |
| 591 | Placebo                          | Hypersomnia              | Affect*                          |
| 592 | Drug therapy                     | Parasomnia               | Depress*                         |
| 593 | Randomly                         | Narcolepsy               | Mood                             |
| 594 | Trial                            | Apnea                    | Stress                           |
| 595 | Groups                           | Apnoea                   | Anxi*                            |
| 596 |                                  | Nightmare*               | Phobi*                           |
| 597 |                                  | “Restless legs syndrome” | “Obsessive compulsive disorder”  |
| 598 |                                  |                          | OCD                              |
| 599 |                                  |                          | PTSD                             |
| 600 |                                  |                          | “Post-traumatic stress disorder” |
| 601 |                                  |                          | Psychos*s                        |
| 602 |                                  |                          | Psychotic                        |
| 603 |                                  |                          | Schiz*                           |
| 604 |                                  |                          | Bipolar                          |
| 605 |                                  |                          | Hallucination*                   |
| 606 |                                  |                          | Delusion*                        |
| 607 |                                  |                          | “Eating disturbance*”            |
| 608 |                                  |                          | Anorexia                         |
| 609 |                                  |                          | Bulimia                          |
| 610 |                                  |                          | “Binge eating”                   |

611 *Notes:* Studies will need to include at least one search term from each of the filter above in the  
 612 title, abstract, or keywords, for consideration for inclusion in the review.

613 \* = Indicates that variants of the word after the asterisk will be searched for (e.g., depress\* will  
 614 search for depressive etc.)

615 <sup>a</sup> The Highly Sensitive Search Strategy (HSSS) is more than just a key word search, rather it  
 616 encompasses search techniques and strategies<sup>53</sup>.

Version 3: 11/07/2017

Does Improving Sleep Lead to Better Mental Health?

30

617 **Table 2**

618 *Variables to be Extracted for Moderation Analysis (where available, see Supplementary Materials 3 for detailed variable categories*  
 619 *and levels)*

| 620 | <b>Source characteristics</b> | <b>Sample characteristics</b>    | <b>Design characteristics</b> | <b>Intervention characteristics</b> |
|-----|-------------------------------|----------------------------------|-------------------------------|-------------------------------------|
| 621 | Publication status            | Age                              | Method of recruitment         | Size of the effect on sleep         |
| 622 | Publication year              | Gender                           | Nature of comparison group(s) | Duration                            |
| 623 | Journal impact factor         | Type of mental health problem(s) | Attrition/drop-out rate       | Theoretical basis                   |
| 624 |                               | Type of sleep problem(s)         | Timing of follow-up           | Mode of delivery                    |
| 625 |                               | Clinical status of mental health | Nature of outcome measure(s)  | Adherence                           |
| 626 |                               | Clinical status of sleep problem | Type of analysis              |                                     |
| 627 |                               | Comorbidity                      | Adjusted vs. unadjusted data  |                                     |
| 628 |                               | Concurrent medication use        | Study quality                 |                                     |
| 629 |                               | Concurrent psychological help    |                               |                                     |

## Supplementary Materials 2

### *Ovid Medline Example Search Strategy*

---

Database: Ovid MEDLINE(R) Epub Ahead of Print, In-Process & Other Non-Indexed Citations, Ovid MEDLINE(R) Daily, Ovid MEDLINE and Versions(R)

Search Strategy:

- 1 (Sleep\$ or Insomnia\$ or nightmare\$ or hypersomnia\$ or parasomnia\$ or narcolepsy or circadian rhythm\$ or restless leg syndrome or apnea or apnoea).ti,ab. (180111)
- 2 Sleep/ or Sleep Disorders, Circadian Rhythm/ or Sleep Disorders, Intrinsic/ or Narcolepsy/ or Restless Legs Syndrome/ or Sleep Apnea Syndromes/ or "Sleep Initiation and Maintenance Disorders"/ or Parasomnias/ (70224)
- 3 1 or 2 (193630)
- 4 (psychological health or distress or mental or psychiat\$ or affect or depress\$ or mood or stress or anxious or anxiety or phobi\$ or obsessive compulsive disorder\$ or OCD or psychos#s or psychotic or schiz\$ or bipolar or bi-polar or hallucination\$ or delusion\$ or eating disorder\$ or eating disturbance\$ or anorexia or bulimia or binge eating or wellbeing or well-being or).ti,ab. (2200869)
- 5 Stress, Psychological/ or Anxiety Disorders/ or Obsessive-Compulsive Disorder/ or Phobic Disorders/ or exp "Feeding and Eating Disorders"/ or Anorexia Nervosa/ or Binge-Eating Disorder/ or Bulimia Nervosa/ or Depressive Disorder/ or Hallucinations/ or Delusions/ or Anxiety/ or Depression/ or psychotic disorders/ (379929)
- 6 4 or 5 (2283788)
- 7 3 and 6 (57412)
- 8 randomized controlled trial.pt. (446587)
- 9 controlled clinical trial.pt. (91788)
- 10 randomized.ab. (389502)
- 11 placebo.ab. (183719)
- 12 drug therapy.fs. (1928261)
- 13 randomly.ab. (270741)
- 14 trial.ab. (409336)

- 1  
2  
3  
4 15 groups.ab. (1670961)  
5 16 or/8-15 (3972831)  
6  
7 17 exp animals/ not humans.sh. (4311313)  
8  
9 18 16 not 17 (3433652)  
10  
11 19 7 and 18 (19379)  
12  
13 20 (trial\$ or intervention\$ or treatment\$).ti,ab. (4565976)  
14  
15 21 7 and 20 (23924)  
16  
17 22 21 not 19 (11896)

18 \*\*\*\*\*  
19  
20  
21  
22  
23  
24  
25  
26  
27  
28  
29  
30  
31  
32  
33  
34  
35  
36  
37  
38  
39  
40  
41  
42  
43  
44  
45  
46  
47  
48  
49  
50  
51  
52  
53  
54  
55  
56  
57  
58  
59  
60

1  
2  
3  
4  
5  
6  
7  
8  
9  
10  
11  
12  
13  
14  
15  
16  
17  
18  
19  
20  
21  
22  
23  
24  
25  
26  
27  
28  
29  
30  
31  
32  
33  
34  
35  
36  
37  
38  
39  
40  
41  
42  
43  
44  
45  
46  
47  
48  
49  
50  
51  
52  
53  
54  
55  
56  
57  
58  
59  
60

**Article meta-data**

1. Please state the surnames and first initials of **all** authors of the article in the box below (e.g. Smith, J. A., Jones, A. C.);

2. Please state the year the article was first available or published;

3. What is the publication status of the article:  Published  
 Unpublished (move to Q4)

3.1. Please state the name of the journal the article was published in below;

3.2. Please state the journals most recent impact factor; .

**Nature of the focal sample**

4. Stage the mean age of the intervention group to the nearest whole year;

5. State the rounded percentage of the total sample who are female;

6. What is the clinical status of the mental health related problems of participants included in the study;

Clinical status     Non-clinical status     Mixed status

7. What is the clinical status of the sleep related problems of participants included in the study;

Clinical status     Non-clinical status     Mixed status



**Nature of the focal sample**

8. Record the type of mental health problems and experiences that the authors measure. Where there are multiple mental health difficulties/problems, record all that are mentioned in the text;

Depression  Anxiety  Stress  Psychosis  Eating disorder  OCD

Phobias  Wellbeing/distress  PTSD

Other (provide details in 8.1)

8.1. Please use the box below to provide further details regarding mental health problems/symptoms if necessary;

9. Record the type of sleep problems and experiences that the authors measure. Where there are multiple sleep problems, record all that are mentioned in the text;

Insomnia  Parasomnia  Hypersomnia  Circadian rhythm

Narcolepsy  Sleep apnoea  Nightmares  Restless-legs

Other (if other, provide details in 9.1)

9.1. Please use the box below to provide further details regarding sleep problems/symptoms if necessary;

10. Do participants have any additional problems/difficulties that are comorbid to the target problem (e.g. alcohol dependency, physical disability etc.)

Yes (move to Q10.1)  No (move to Q12)

10.1. Please list any comorbidities stated by the authors;

**Nature of the focal sample**

11. Were participants allowed to take medication for a mental health difficulty/problem that is different to the intervention being tested whilst taking part in the research?

Yes  No

12. Were participants allowed to take medication for a sleep difficulty that is different to the intervention being tested whilst taking part in the research?

Yes  No

13. Were participants receiving psychological help for a mental health difficulty/problem that is different to the intervention being tested whilst taking part in the research?

Yes  No

14. Were participants receiving psychological help for a sleep difficulty that is different to the intervention being tested whilst taking part in the research?

Yes  No

**Research design**

15. Select the method of recruitment used in the study;

Health professional referral  Self-referral/voluntary  Mixed  Other

16. Please state the nature of the comparison group;

**16.1. Comparator 1**

Wait-list  TAU  Placebo  Active control

**16.2. Comparator 2**

Wait-list  TAU  Placebo  Active control  NA

**16.3. Comparator 3**

Wait-list  TAU  Placebo  Active control  NA

**16.4. Comparator 4**

Wait-list  TAU  Placebo  Active control  NA



1  
2  
3  
4  
5  
6  
7  
8  
9  
10  
11  
12  
13  
14  
15  
16  
17  
18  
19  
20  
21  
22  
23  
24  
25  
26  
27  
28  
29  
30  
31  
32  
33  
34  
35  
36  
37  
38  
39  
40  
41  
42  
43  
44  
45  
46  
47  
48  
49  
50  
51  
52  
53  
54  
55  
56  
57  
58  
59  
60

### Research design

21. Please state the type of analysis conducted;

Intention to treat (ITT)     Per protocol     Not stated     Other 

22. State whether adjusted or unadjusted data has been used to compute an effect size;

Adjusted     Unadjusted

23. Please use the Jadad quality scale to score the study in terms of randomization, blinding and the account of participants. Use the 'Score given' column, placing your score in the box provided. Examples and guidance on the interpretation of each item are provided in the coding manual;

| Item                    | Min/max score | Description                                                                                                                                                                            | Score                    |
|-------------------------|---------------|----------------------------------------------------------------------------------------------------------------------------------------------------------------------------------------|--------------------------|
| Randomization           | 0 to 2        | 1 point if randomization is mentioned at all<br><br>1 additional point if the method of randomization is appropriate<br><br>Deduct 1 point if method of randomization is inappropriate | <input type="checkbox"/> |
| Blinding                | 0 to 2        | 1 point if blinding is mentioned<br><br>1 additional point if the method of blinding is appropriate<br><br>Deduct 1 point if the method of blinding is inappropriate                   | <input type="checkbox"/> |
| Account of participants | 0 to 1        | The fate of all participants in the trial is known. If there are no data the reason is stated                                                                                          | <input type="checkbox"/> |
| Total score             | 0 to 5        | Sum total of all domains                                                                                                                                                               | <input type="checkbox"/> |

**Intervention characteristics**

24. Please indicate the size of the effect on sleep quality (Hedges  $g$ ) of the intervention at the first statistically significant follow-up;

Small ( $\leq 0.33$ )     Medium ( $> 0.33, \leq 0.66$ )     Large ( $> 0.66$ )

25. Please state the duration of the intervention(s) to the nearest week;

26. Do the authors specify the theoretical basis of the intervention? If so, provide the broad theoretical category;

Psychological     Pharmacological     Medical device

27. State the approach to intervention that the study describes (tick all that apply);

CBTi     Psychoeducation     Sleep hygiene  
 Mindfulness     Relaxation     Exercise/activity increase  
 Exposure     Image rehearsal     Alternative medicine  
 Medication     Paradoxical intention     Sleep restriction  
 Behavioural     Other (if other, provide more detail in 22.1)

27.1. Please use the box below to provide more details if required;

28. Please state the mode of delivery of the intervention (tick all that apply);

Face-to-face     Self-help/self-administration

28.1. If self-help/self-administration, please state how the intervention was delivered (tick all that apply);

Internet     Video     Pen/paper     Bibliotherapy  
 Other (other, provide more detail in 28.2)

1  
2  
3  
4  
5  
6  
7  
8  
9  
10  
11  
12  
13  
14  
15  
16  
17  
18  
19  
20  
21  
22  
23  
24  
25  
26  
27  
28  
29  
30  
31  
32  
33  
34  
35  
36  
37  
38  
39  
40  
41  
42  
43  
44  
45  
46  
47  
48  
49  
50  
51  
52  
53  
54  
55  
56  
57  
58  
59  
60

**Intervention characteristics**

28.2. Please provide more detail if necessary below;

29. Please record adherence to the intervention where possible. If no adherence data is available, please state "not reported";

**Notes and comments**

**END OF FORM**

## Supplementary Materials 4

*Data Extraction Manual***Data extraction manual**

The following document contains details regarding the data to be extracted from primary studies included in the present review. Characteristics of the source (green), sample (yellow), study (blue), and intervention (grey) are outlined here.

| Variable                         | Definition for coding                                                                                                                                                                                                                                                                                                                                                                                                                                                                             | Example                                                                      |
|----------------------------------|---------------------------------------------------------------------------------------------------------------------------------------------------------------------------------------------------------------------------------------------------------------------------------------------------------------------------------------------------------------------------------------------------------------------------------------------------------------------------------------------------|------------------------------------------------------------------------------|
| 1. Authors                       | The surnames and first initials of all authors.                                                                                                                                                                                                                                                                                                                                                                                                                                                   | Smith, J. A., Jones, A. C.                                                   |
| 2. Publication year              | The year that the article was first published.                                                                                                                                                                                                                                                                                                                                                                                                                                                    | 2017                                                                         |
| 3. Publication status            | Refers to whether the article has been published in a peer reviewed academic journal or not.<br><br>Articles published in a peer reviewed academic journal should be coded as 'Published'.<br><br>Articles that have not been published in a peer reviewed academic journal should be coded as 'unpublished'.<br><br>Unpublished studies include those taken from PhD theses, dissertations, or studies that have otherwise not been accepted following peer review, or submitted to peer review. | Published                                                                    |
| 3.1. Journal name (if published) | The name of the journal that the article was published in.                                                                                                                                                                                                                                                                                                                                                                                                                                        | e.g. <i>British Journal of Psychiatry</i> or <i>Psychiatry Research</i> etc. |
| 3.2. Impact factor               | Impact factor of the journal in which the article was published. This should be computed using the most recent available data from Thomson Reuters InCites                                                                                                                                                                                                                                                                                                                                        | 4.72 (2016)                                                                  |

|                                                                     |                                                                                                                                                                                                                                                                                                                                                                                                                                                                 |                                                                                                                                                                                                                                                                                                                                                                                                                                                                                                                                                                                                                                       |
|---------------------------------------------------------------------|-----------------------------------------------------------------------------------------------------------------------------------------------------------------------------------------------------------------------------------------------------------------------------------------------------------------------------------------------------------------------------------------------------------------------------------------------------------------|---------------------------------------------------------------------------------------------------------------------------------------------------------------------------------------------------------------------------------------------------------------------------------------------------------------------------------------------------------------------------------------------------------------------------------------------------------------------------------------------------------------------------------------------------------------------------------------------------------------------------------------|
|                                                                     | Journal Citation Reports (please note the year in parentheses)                                                                                                                                                                                                                                                                                                                                                                                                  |                                                                                                                                                                                                                                                                                                                                                                                                                                                                                                                                                                                                                                       |
| 4. Age                                                              | <p>The mean age of the participants in the group who received an intervention designed to improve sleep.</p> <p>If mean age is not reported for the experimental group alone, then report the mean age of the sample as a whole.</p> <p>If no data on the age of the sample is available, then state 'not reported'</p>                                                                                                                                         | 27 years                                                                                                                                                                                                                                                                                                                                                                                                                                                                                                                                                                                                                              |
| 5. Gender                                                           | <p>The percentage of participants who are female in the group receiving an intervention designed to improve sleep.</p> <p>If the gender of the participants is not reported for the experimental group alone, then report the percentage of participants who are female in the total sample.</p> <p>If no data on gender is available, then state 'not reported'</p>                                                                                            | 67%                                                                                                                                                                                                                                                                                                                                                                                                                                                                                                                                                                                                                                   |
| 6. Clinical status of participants' (with respect to mental health) | <p>The mental health status of the sample should be coded as either; i) clinical; ii) non-clinical, or iii) mixed</p> <p><b>Clinical samples</b> are those that comprise primarily of participants that have a clinical diagnosis of a mental health problem as defined by formal criteria (e.g., ICD, DSM).</p> <p><b>Non-clinical samples</b> are those that comprise primarily of participants that have no formal diagnosis of a mental health problem.</p> | <p>A study investigating the impact of an intervention aimed at improving sleep on paranoid thinking might recruit participants with a DSM diagnosed psychosis spectrum disorder only. As a DSM rated diagnosis is a requirement for entry into the trial, this would be coded as a <b>clinical sample</b>.</p> <p>A similar study investigating the impact of an intervention aimed at improving sleep on paranoid thinking might include participants from the general population who do not have a formal diagnoses of a mental health problem. For example, participants might volunteer in response to a media advertisement</p> |

1  
2  
3  
4  
5  
6  
7  
8  
9  
10  
11  
12  
13  
14  
15  
16  
17  
18  
19  
20  
21  
22  
23  
24  
25  
26  
27  
28  
29  
30  
31  
32  
33  
34  
35  
36  
37  
38  
39  
40  
41  
42  
43  
44  
45  
46  
47



|                                                                   |                                                                                                                                                                                                                                                                                                                                                                                                                                                                                                                                                                                                                      |                                                                                                                                                                                                                                                                                                                                                                                                                                                                                                                                                                                                                                                                                                                      |
|-------------------------------------------------------------------|----------------------------------------------------------------------------------------------------------------------------------------------------------------------------------------------------------------------------------------------------------------------------------------------------------------------------------------------------------------------------------------------------------------------------------------------------------------------------------------------------------------------------------------------------------------------------------------------------------------------|----------------------------------------------------------------------------------------------------------------------------------------------------------------------------------------------------------------------------------------------------------------------------------------------------------------------------------------------------------------------------------------------------------------------------------------------------------------------------------------------------------------------------------------------------------------------------------------------------------------------------------------------------------------------------------------------------------------------|
|                                                                   | <b>Mixed samples</b> are those that include a mix of participants who have formal clinical diagnoses and those who do not.                                                                                                                                                                                                                                                                                                                                                                                                                                                                                           | of email invitation. This would be coded as a <b>non-clinical sample</b> .                                                                                                                                                                                                                                                                                                                                                                                                                                                                                                                                                                                                                                           |
| 7. Clinical status of participants with respect to sleep problems | <p>The clinical status of the sleep difficulties reported by the sample should be coded as either; i) clinical; ii) non-clinical, or iii) mixed</p> <p><b>Clinical samples</b> are those that comprise primarily of participants that have a clinical diagnosis of a sleep problem as defined by formal criteria (e.g., ICD, DSM).</p> <p><b>Non-clinical samples</b> are those that comprise primarily of participants that have no formal diagnosis of a sleep problem.</p> <p><b>Mixed participants</b> are those that include a mix of participants who have formal clinical diagnoses and those who do not.</p> | <p>A study investigating the impact of an intervention aimed at improving sleep on depressive symptoms might recruit participants with a DSM diagnosed sleep problem (e.g. insomnia). As a DSM rated diagnosis of insomnia is a requirement for entry into the trial, this would be coded as a <b>clinical sample</b>.</p> <p>A similar study investigating the impact of an intervention aimed at improving sleep on depressive symptoms might include participants from the general population who do not have a formal diagnoses of a sleep problem. For example, participants might volunteer in response to a media advertisement or email invitation. This would be coded as a <b>non-clinical sample</b>.</p> |
| 8. Type of mental problems                                        | <p>The type of mental health problem(s) and experiences that the authors measure.</p> <p>Where there are multiple mental health problems, record all that are mentioned in the text.</p>                                                                                                                                                                                                                                                                                                                                                                                                                             | A study may use the GAD-7 and the BDI to measure anxiety and depression at baseline and again at post-intervention. In this case, record ‘anxiety’ and ‘depression’.                                                                                                                                                                                                                                                                                                                                                                                                                                                                                                                                                 |
| 9. Type of sleep problem(s)                                       | <p>The type of sleep problem(s) and experiences that the authors measure.</p> <p>Where there are multiple sleep problems, record all that are mentioned in the text.</p>                                                                                                                                                                                                                                                                                                                                                                                                                                             | A study may use the insomnia severity scale and the PSQI to measure insomnia and sleep quality at baseline and again at post-intervention. In this case, record ‘insomnia’ and ‘sleep quality’.                                                                                                                                                                                                                                                                                                                                                                                                                                                                                                                      |
| 10. Comorbidity                                                   | Any problems or difficulties identified by the authors that are comorbid to the targeted sleep and/or mental health problem.                                                                                                                                                                                                                                                                                                                                                                                                                                                                                         | An example would be an intervention designed to improve sleep in those with depression and alcohol dependency. For this review, sleep and depression would not be considered comorbid at these are the                                                                                                                                                                                                                                                                                                                                                                                                                                                                                                               |

|                                                          |                                                                                                                                                            |                                                                                                                                                                                                                                                                                                                                                                                                                                                                                                                                                                                                             |
|----------------------------------------------------------|------------------------------------------------------------------------------------------------------------------------------------------------------------|-------------------------------------------------------------------------------------------------------------------------------------------------------------------------------------------------------------------------------------------------------------------------------------------------------------------------------------------------------------------------------------------------------------------------------------------------------------------------------------------------------------------------------------------------------------------------------------------------------------|
|                                                          |                                                                                                                                                            | target problems of this review. However, alcohol dependency would be considered a comorbid problem.                                                                                                                                                                                                                                                                                                                                                                                                                                                                                                         |
| 11. Concurrent medication use for mental health          | Did participants take medication for a mental health difficulty in addition to the intervention being tested while taking part in the research?            | <p>A study may investigate the effect of improving sleep using CBTi in people with depression who are also using SSRI medication. As these participants are receiving medication for depression in addition to receiving an intervention designed to improve sleep, they would be classed as using concurrent medication for a mental health problem.</p> <p>Alternatively, a study may screen those using medication for a mental health problem and remove these participants before randomisation. In which case, state that the participants are not using concurrent medication for mental health.</p> |
| 12. Concurrent medication use for sleep                  | Did participants take medication for a sleep difficulty that is different to the intervention being tested while taking part in the research?              | <p>A study that tests the impact of an intervention for insomnia that allows participants to continue with benzodiazepine use would be classed as allowing concurrent medication for a sleep problems.</p> <p>Alternatively, a study might screen those taking medication for a sleep problem and remove these participants before randomization. In which case, state that the participants are not using concurrent medication for sleep.</p>                                                                                                                                                             |
| 13. Concurrent psychological treatment for mental health | Did participants receive psychological help for a mental health difficulty in addition to the intervention being tested while taking part in the research? | A study where participants continued receiving psychological help from outside of the study team for an anxiety problem while receiving the study intervention would be classed as involving concurrent psychological treatment for mental health.                                                                                                                                                                                                                                                                                                                                                          |

1  
2  
3  
4  
5  
6  
7  
8  
9  
10  
11  
12  
13  
14  
15  
16  
17  
18  
19  
20  
21  
22  
23  
24  
25  
26  
27  
28  
29  
30  
31  
32  
33  
34  
35  
36  
37  
38  
39  
40  
41  
42  
43  
44  
45  
46  
47

|                                                  |                                                                                                                                                                                                                                                                                                 |                                                                                                                                                                                                                                                                                                                                                                                                                                                                                                                                                                                                                                         |
|--------------------------------------------------|-------------------------------------------------------------------------------------------------------------------------------------------------------------------------------------------------------------------------------------------------------------------------------------------------|-----------------------------------------------------------------------------------------------------------------------------------------------------------------------------------------------------------------------------------------------------------------------------------------------------------------------------------------------------------------------------------------------------------------------------------------------------------------------------------------------------------------------------------------------------------------------------------------------------------------------------------------|
|                                                  |                                                                                                                                                                                                                                                                                                 | Alternatively, a study may screen participants who are currently receiving psychological help for a mental health problem and remove these participants before randomisation. In which case, state that the participants are not receiving concurrent psychological treatment for mental health.                                                                                                                                                                                                                                                                                                                                        |
| 14. Concurrent psychological treatment for sleep | Did participants receive psychological help for a sleep difficulty in addition to the intervention being tested while taking part in the research?                                                                                                                                              | <p>A study where participants are able to continue receiving psychological help from outside of the study team for a sleep problem while receiving the study intervention.</p> <p>Alternatively, a study may screen participants who are currently receiving psychological help for a sleep problem and remove these participants before randomization. In which case, state that the participants are not receiving concurrent psychological treatment for sleep.</p>                                                                                                                                                                  |
| 15. Method of recruitment                        | <p>How participants were recruited and from which source(s).</p> <p>The method of recruitment should be coded as;</p> <ol style="list-style-type: none"> <li>1. Referral by a health professional (e.g., GP)</li> <li>2. Self-referral/voluntary</li> <li>3. Mixed</li> <li>4. Other</li> </ol> | <p>Clinicians may refer participants with psychosis spectrum diagnoses from outpatient centres into the trial. In which case, record that participants were referred by a healthcare professionals.</p> <p>Alternatively, participants may see advertisements and contact the study team directly. In which case, record that participants were self-referred to the study.</p> <p>Some studies could recruit participants who are referred by a health professional and those who self-refer, in which case code this as mixed recruitment.</p> <p>Code any studies that use a method of recruitment not specified here as 'other'</p> |

|                                       |                                                                                                                                                                                                                                                                                                                                                                                                                                                                                                                                                                                                                                                   |                                                                                                                                                                                                                                                                                                                                                                                                                                                                                                                                                                                              |
|---------------------------------------|---------------------------------------------------------------------------------------------------------------------------------------------------------------------------------------------------------------------------------------------------------------------------------------------------------------------------------------------------------------------------------------------------------------------------------------------------------------------------------------------------------------------------------------------------------------------------------------------------------------------------------------------------|----------------------------------------------------------------------------------------------------------------------------------------------------------------------------------------------------------------------------------------------------------------------------------------------------------------------------------------------------------------------------------------------------------------------------------------------------------------------------------------------------------------------------------------------------------------------------------------------|
| <p>16. Nature of comparison group</p> | <p>Identify the nature of the comparison group.</p> <p><b>Wait-list</b> groups are defined as those who receive no intervention (including usual care) for the duration of the study</p> <p><b>Treatment as Usual (TaU)</b> groups are those that receive only their usual care throughout the study</p> <p><b>Placebo</b> groups are those that unknowingly receive a ‘sham’ treatment that is specifically designed to have no real effect.</p> <p><b>Active control</b> groups are those that receive an intervention that can theoretically have an effect on outcomes, but it is not the primary intervention being tested in the study.</p> | <p>An example of an active control group would be a trial comparing a group receiving full CBTi intervention with a group who simply complete a daily sleep diary. Although the sleep diary group have not received a CBTi intervention, the act of keeping a diary could improve sleep quality and is therefore considered an ‘active’ intervention. Other examples of active control groups include trials that compare CBT for depression against a befriending group or comparing two drugs that can affect outcomes (e.g., melatonin vs. benzodiazepines on sleep related outcomes)</p> |
| <p>17. Attrition/dropout</p>          | <p>The total number of participants in the intervention group(s) who have dropped out of the trial between baseline and each follow-up point should be expressed as a percentage.</p>                                                                                                                                                                                                                                                                                                                                                                                                                                                             | <p>If a study stated that <math>n = 100</math> participants in the intervention group provided baseline data, <math>n = 75</math> provided data immediately post-intervention and <math>n = 50</math> provided data at 6 month follow-up, then this would be reported as;</p> <p>Post-intervention = 25% attrition</p> <p>6 month follow-up = 50% attrition</p>                                                                                                                                                                                                                              |
| <p>18. Follow-up point</p>            | <p>The number of weeks following the intervention where outcome data is reported.</p> <p>Where there are multiple follow-up periods, state the number of weeks following the intervention for each.</p>                                                                                                                                                                                                                                                                                                                                                                                                                                           | <p>A study that collects data immediately after an intervention has been delivered and then again 3 and 12 months later would have the following follow-up points;</p> <ol style="list-style-type: none"> <li>1. 0 weeks (post-intervention)</li> <li>2. 13 weeks (3 months)</li> <li>3. 52 weeks (12 months)</li> </ol>                                                                                                                                                                                                                                                                     |

|                              |                                                                                                                                                                                                                                                                                                     |                                                                                                                                                                                                                                                                                                                                                                                                                                                                                                                                                                                                                                                                                                                                                                                                   |
|------------------------------|-----------------------------------------------------------------------------------------------------------------------------------------------------------------------------------------------------------------------------------------------------------------------------------------------------|---------------------------------------------------------------------------------------------------------------------------------------------------------------------------------------------------------------------------------------------------------------------------------------------------------------------------------------------------------------------------------------------------------------------------------------------------------------------------------------------------------------------------------------------------------------------------------------------------------------------------------------------------------------------------------------------------------------------------------------------------------------------------------------------------|
| 19. Measure of sleep         | The name of the measure(s) used to assess sleep.<br>Identify whether each measure was; i) self-reported; ii) rated by a clinician; or iii) measured objectively.                                                                                                                                    | A study that uses both polysomnography and the Insomnia Severity Index (ISI) would be coded as having both an objective and a self-report measure of sleep.                                                                                                                                                                                                                                                                                                                                                                                                                                                                                                                                                                                                                                       |
| 20. Measure of mental health | The name of the measure(s) used to assess mental health and/or wellbeing.<br>Identify whether each measure was self-reported or rated by a clinician                                                                                                                                                | A study that uses the Anxiety Disorder Interview Schedule (ADIS) and the Generalised Anxiety Disorder Assessment-7 (GAD-7) would be coded as having both a clinician-rated measure of anxiety disorders and a self-report measure.                                                                                                                                                                                                                                                                                                                                                                                                                                                                                                                                                                |
| 21. Study quality            | The Jadad scale assesses three key aspects of study quality that can affect the risk of bias; (i) randomization, (ii) blinding, and (iii) rates of withdrawal / drop-out.<br><br>For guidance, please refer to the Jadad scale embedded within the data extraction form and the accompanying notes. | Full guidance and examples are provided in the data extraction form. However, an example in relation to the assessment of randomization is given below;<br><br>Give a max score of 2 for randomization and a minimum score of 0<br><br>Award 1 point if randomization is mentioned (e.g. <i>“The patients were randomly assigned to one of two groups”</i> ).<br><br>Award 1 additional point if the method of randomization is appropriate (e.g. <i>“The randomization was accomplished using a computer, generated random number list, coin toss, or well-shuffled envelopes”</i> ).<br><br>Deduct 1 point if the method of randomization is inappropriate (e.g. <i>“The group assignment was accomplished by alternate assignment, by birthday, hospital number or day of the week etc.”</i> ) |

|                                                                     |                                                                                                                                                                                                                                                                                                                                                                                                                                                                                                                                                              |                                                                                                                                                                                |
|---------------------------------------------------------------------|--------------------------------------------------------------------------------------------------------------------------------------------------------------------------------------------------------------------------------------------------------------------------------------------------------------------------------------------------------------------------------------------------------------------------------------------------------------------------------------------------------------------------------------------------------------|--------------------------------------------------------------------------------------------------------------------------------------------------------------------------------|
| <p>22. Size of the effect of the intervention on sleep quality.</p> | <p>Please indicate the size of the effect that the intervention has on sleep quality at the first follow-up point at which this effect is statistically significant.</p> <p>Use the method for computing effect sizes outlined in the protocol and then interpret the effect size with respect to Cohen's (1992) criteria, which for Hedges <math>g</math> corresponds to:</p> <p><b>Small</b> effect (<math>g \leq 0.33</math>)</p> <p><b>Medium</b> effect (<math>g &gt; 0.33, \leq 0.66</math>)</p> <p><b>Large</b> effect (<math>g &gt; 0.66</math>)</p> | <p>Medium effect.</p>                                                                                                                                                          |
| <p>23. Duration of the intervention</p>                             | <p>How long did the intervention last (to the nearest week)? If this is not known or reported, then please state unknown.</p> <p>Note that this should be coded as the <i>intended</i> duration of the intervention, regardless of how long participants actually engaged with the intervention.</p>                                                                                                                                                                                                                                                         | <p>An intervention that comprises of 6 weekly modules would be coded as 6 weeks long, even if 80% of the participants only attended the first 4 weeks of the intervention.</p> |
| <p>24. Theoretical basis of the intervention</p>                    | <p>Do the authors specify the theoretical basis of the intervention? If so, state which theory (or theories) were used.</p>                                                                                                                                                                                                                                                                                                                                                                                                                                  | <p>CBTi</p>                                                                                                                                                                    |
| <p>25. Delivery modality</p>                                        | <p>Identify the primary mode by which the intervention was delivered.</p> <p><b>Face-to-face delivery</b> includes interventions which are administered in person by a clinician, researcher, therapist or peer</p> <p><b>Self-help / self-administered interventions</b> are defined as those that are "designed to be conducted predominantly independently of professional contact" (Bower, Richards, &amp; Lovell, 2001, p. 839)</p>                                                                                                                     | <p>Face-to-face delivery</p>                                                                                                                                                   |

|                                   |                                                                                                                                                                                                     |                                                                                                                                                                 |
|-----------------------------------|-----------------------------------------------------------------------------------------------------------------------------------------------------------------------------------------------------|-----------------------------------------------------------------------------------------------------------------------------------------------------------------|
| 26. Adherence to the intervention | If the study assessed rate of adherence to intervention, then describe the nature of the measure along with the rate of adherence.<br><br>If adherence was not assessed, then state “Not assessed”. | If an intervention comprised of 6 weekly modules and the average number of modules completed was 4, then state “Average proportion of modules completed - 66%”. |
|-----------------------------------|-----------------------------------------------------------------------------------------------------------------------------------------------------------------------------------------------------|-----------------------------------------------------------------------------------------------------------------------------------------------------------------|

For peer review only

Supplementary Materials 1

PRISMA-P Checklist

PRISMA-P (Preferred Reporting Items for Systematic review and Meta-Analysis Protocols) 2015 checklist: recommended items to address in a systematic review protocol\*

Page and line numbers, emboldened and in parentheses, indicate the location of the PRISMA-P item in the corresponding manuscript.

| Section and topic                 | Item No | Checklist item                                                                                                                                                                                                |
|-----------------------------------|---------|---------------------------------------------------------------------------------------------------------------------------------------------------------------------------------------------------------------|
| <b>ADMINISTRATIVE INFORMATION</b> |         |                                                                                                                                                                                                               |
| Title:                            |         |                                                                                                                                                                                                               |
| Identification                    | 1a      | Identify the report as a protocol of a systematic review ( <b>p. 1</b> )                                                                                                                                      |
| Update                            | 1b      | If the protocol is for an update of a previous systematic review, identify as such ( <b>NA</b> )                                                                                                              |
| Registration                      | 2       | If registered, provide the name of the registry (such as PROSPERO) and registration number ( <b>p. 2</b> )                                                                                                    |
| Authors:                          |         |                                                                                                                                                                                                               |
| Contact                           | 3a      | Provide name, institutional affiliation, e-mail address of all protocol authors; provide physical mailing address of corresponding author ( <b>p. 1</b> )                                                     |
| Contributions                     | 3b      | Describe contributions of protocol authors and identify the guarantor of the review ( <b>p. 19</b> )                                                                                                          |
| Amendments                        | 4       | If the protocol represents an amendment of a previously completed or published protocol, identify as such and list changes; otherwise, state plan for documenting important protocol amendments ( <b>NA</b> ) |
| Support:                          |         |                                                                                                                                                                                                               |
| Sources                           | 5a      | Indicate sources of financial or other support for the review ( <b>p. 19</b> )                                                                                                                                |
| Sponsor                           | 5b      | Provide name for the review funder and/or sponsor ( <b>NA</b> )                                                                                                                                               |
| Role of sponsor or funder         | 5c      | Describe roles of funder(s), sponsor(s), and/or institution(s), if any, in developing the protocol ( <b>NA</b> )                                                                                              |
| <b>INTRODUCTION</b>               |         |                                                                                                                                                                                                               |
| Rationale                         | 6       | Describe the rationale for the review in the context of what is already known ( <b>p.4-7</b> )                                                                                                                |
| Objectives                        | 7       | Provide an explicit statement of the question(s) the review will address with reference to participants, interventions, comparators, and outcomes (PICO) ( <b>p. 7 and p. 10-11</b> )                         |
| <b>METHODS</b>                    |         |                                                                                                                                                                                                               |



|                                    |     |                                                                                                                                                                                                                                                                      |
|------------------------------------|-----|----------------------------------------------------------------------------------------------------------------------------------------------------------------------------------------------------------------------------------------------------------------------|
| Eligibility criteria               | 8   | Specify the study characteristics (such as PICO, study design, setting, time frame) and report characteristics (such as years considered, language, publication status) to be used as criteria for eligibility for the review (p. 10-11)                             |
| Information sources                | 9   | Describe all intended information sources (such as electronic databases, contact with study authors, trial registers or other grey literature sources) with planned dates of coverage (p. 11)                                                                        |
| Search strategy                    | 10  | Present draft of search strategy to be used for at least one electronic database, including planned limits, such that it could be repeated (see Supplementary Materials 2)                                                                                           |
| Study records:                     |     |                                                                                                                                                                                                                                                                      |
| Data management                    | 11a | Describe the mechanism(s) that will be used to manage records and data throughout the review (p. 11)                                                                                                                                                                 |
| Selection process                  | 11b | State the process that will be used for selecting studies (such as two independent reviewers) through each phase of the review (that is, screening, eligibility and inclusion in meta-analysis) (p. 12)                                                              |
| Data collection process            | 11c | Describe planned method of extracting data from reports (such as piloting forms, done independently, in duplicate), any processes for obtaining and confirming data from investigators (p. 12)                                                                       |
| Data items                         | 12  | List and define all variables for which data will be sought (such as PICO items, funding sources), any pre-planned data assumptions and simplifications (see Table 2 and Supplementary Materials 3 & 4)                                                              |
| Outcomes and prioritization        | 13  | List and define all outcomes for which data will be sought, including prioritization of main and additional outcomes, with rationale (p.8. See also Table 2, p. 30)                                                                                                  |
| Risk of bias in individual studies | 14  | Describe anticipated methods for assessing risk of bias of individual studies, including whether this will be done at the outcome or study level, or both; state how this information will be used in data synthesis (p. 14)                                         |
| Data synthesis                     | 15a | Describe criteria under which study data will be quantitatively synthesised (p.13)                                                                                                                                                                                   |
|                                    | 15b | If data are appropriate for quantitative synthesis, describe planned summary measures, methods of handling data and methods of combining data from studies, including any planned exploration of consistency (such as I <sup>2</sup> , Kendall's $\tau$ ) (p. 13-15) |
|                                    | 15c | Describe any proposed additional analyses (such as sensitivity or subgroup analyses, meta-regression) (p. 15-17)                                                                                                                                                     |
|                                    | 15d | If quantitative synthesis is not appropriate, describe the type of summary planned (NA)                                                                                                                                                                              |
| Meta-bias(es)                      | 16  | Specify any planned assessment of meta-bias(es) (such as publication bias across studies, selective reporting within studies) (p. 14)                                                                                                                                |
| Confidence in cumulative evidence  | 17  | Describe how the strength of the body of evidence will be assessed (such as GRADE) (p. 15)                                                                                                                                                                           |

**\* It is strongly recommended that this checklist be read in conjunction with the PRISMA-P Explanation and Elaboration (cite when available) for important clarification on the items. Amendments to a review protocol should be tracked and dated. The copyright for PRISMA-P (including checklist) is held by the PRISMA-P Group and is distributed under a Creative Commons Attribution Licence 4.0.**

*From: Shamseer L, Moher D, Clarke M, Ghersi D, Liberati A, Petticrew M, Shekelle P, Stewart L, PRISMA-P Group. Preferred reporting items for systematic review and meta-analysis protocols (PRISMA-P) 2015: elaboration and explanation. BMJ. 2015 Jan 2;349(jan02 1):g7647.*
